# Supplementary material for: Microglial calcium signaling is attuned to neuronal activity in awake mice
Source: eLife. 2020 Jul 27;9:e56502. doi: 10.7554/eLife.56502 (PMC7402678; doi:10.7554/eLife.56502)
Supplement: Figure 1—source data 1. [file elife-56502-fig1-data1.xlsx]

## Sheet: Figure 1D-Max Amplitude
	Layer I					Layer II/III
	Somata		Processes			Somata		Processes
	Lck-6f	Cyto-6s	Lck-6f	Cyto-6s		Lck-6f	Cyto-6s	Lck-6f	Cyto-6s
1	0.757646	0.998681	1.12671	2.16494		1.18729	0.705693	1.72268	1.51674
2	0.624839	2.7166	0.4058	6.80048		0.536935	1.1203	1.83015	0.56739
3	0.68366	1.29159	0.9901	1.49761		0.690147	0.287178	0.958252	1.98217
4	0.99573	0.845519	0.556541	1.35841		0.296315	0.569969	0.74753	2.39882
5	0.354127	0.910328	0.855261	1.55052		0.37807	0.672856	1.16139	1.11144
6	0.530433	0.772549	0.763131	3.03809		0.587123	0.871226	0.841355	0.748595
7	0.460378	2.24298	0.82624	1.40955		0.835586	1.37946	0.804194	0.64283
8	0.340139	0.74966	0.593509	0.420501		0.880507	1.00739	1.47096	1.18561
9	0.615439	4.65647	0.511143	4.09563		1.01188	0.785238	1.43069	1.53486
10	0.697065	1.69541	0.657541	1.77465		0.355151	1.66533	0.967192	0.758279
11	0.775808	2.25108	1.12979	4.31795		0.435163	3.63659	1.17862	1.53152
12	0.65505	1.82498	0.75046	3.06735		0.651861	0.559962	1.30077	1.02939
13	0.582118	4.29217	0.928237	2.81477		0.391053	0.976984	0.736754	1.62352
14	0.851907	1.4628	1.07757	1.50709		0.955692	0.911047	0.925254	3.73221
15	0.586308	0.897798	0.491554	2.58044		0.978727	1.05625	0.690852	1.65684
16	0.530007	0.56614	0.638945	3.39361		0.680428	0.659023	1.48102	0.869029
17	0.52056	0.513257	1.02387	2.11495		0.666976	1.28184	0.850687	0.743743
18	1.1564	2.5343	0.926074	1.8855		0.554616	0.68416	0.527288	0.794067
19	0.936854	1.25434	0.446801	1.38783		0.672084	1.60647	1.23717	0.705375
20	0.490613	1.04204	0.467128	1.28125		0.86134	0.607472	1.04061	0.541429
21	0.918545	1.16682	0.769547	0.864734		0.622626	1.39374	1.37234	2.97008
22	0.412141	4.69199	1.35767	0.634169		0.948407	1.34055	0.946117	0.537365
23	0.861007	1.34424	0.722653	0.60099		1.11391	2.96234	1.2987	1.2923
24	0.579032	1.03522	0.657538	0.613218		0.640692	1.99448	1.72329	0.902769
25	0.577937	1.06176	0.369722	0.880207		1.12715	0.976373	1.62754	1.04205
26	0.790214	0.427053	0.800863	0.949714		1	0.52916	0.592124	1.6318
27	0.623259	1.07318	0.49268	0.647987		1.55372	0.806497	0.747255	2.63983
28	0.889238	1.63795	0.75149	1.40833		0.866707	0.511543	0.735717	1.24143
29	0.512553	0.610629	0.409499	0.787919		0.945435	0.730904	0.528249	3.12583
30	0.576657	1.1531	0.472802	0.597252		1.38579	2.03494	0.517424	0.78085
31	1.74275	1.9342	0.662011	1.04879		0.991623	1.19043	0.828864	0.901239
32	0.520188	0.760948	0.497919	1.67659		0.84402	2.87904	0.674765	0.751453
33	0.586032	0.535565	0.555054	2.36389		0.470263	0.606828	0.78223	1.40685
34	1.25025	0.760683	0.477307	2.66103		0.709744	0.736038	0.735325	1.00739
35	0.383857	1.5458	0.945102	0.722908		0.811675	0.75068	0.704932	1.70438
36	0.566469	1.00198	1.27963	1.05266		0.815846	0.513626	0.919924	1.79019
37	0.780683	0.465352	0.747112	1.11835		0.714707	0.657233	1.4627	0.688376
38	1.67171	0.509775	0.520588	0.9277		0.555894	0.807478	0.755204	0.539404
39	1.29626	1.13945	0.541073	2.04977		1.16078	0.971819	1.18052	1.67134
40	0.618566	1.41095	0.434505	0.764547		0.509509	0.902353	1.35116	1.11773
41	0.977774	2.01366	0.62896	0.587668		1.05184	0.652977	1.06128	1.16298
42	0.492381	1.49007	0.39843	0.487747		0.944045	1.43903	1.65301	1.19369
43	0.642236	0.750225	0.41217	1.70464		0.757458	0.821395	1.5735	1.89327
44	0.557169	0.586093	0.768297	0.642823		0.662869	1.20716	0.64694	1.58916
45	0.910891	1.25997	0.58488	0.533362		0.50314	0.804078	1.16403	2.04535
46	0.591995	0.397117	0.909487	2.12594		0.945163	0.349803	0.978546	1.00246
47	2.63695	0.44576	2.75504	2.33102		0.554985	0.428694	1.0851	1.035
48	0.960791	0.478556	0.727414	1.286		0.571617	0.298767	0.86352	0.766439
49	1.10572	0.451056	0.829734	1.33743		0.821507	0.386889	1.09425	0.689251
50	0.797167	0.434357	0.449073	1.25404		0.653879	0.574544	0.544628	0.839595
51	0.932878	0.483683	1.02333	1.33486		0.903833	0.510009	0.495003	1.81934
52	0.498523	0.546735	0.886354	1.19486		0.635665	0.931268	1.344	2.0491
53	0.860727	0.609595	0.992037	0.972721		0.588588	0.499034	0.565433	3.36314
54	0.637291	0.524475	1.15172	1.85466		0.489758	1.68752	0.588014	0.877092
55	0.530147	4.15857	0.82013	1.68768		0.664498	0.675765	0.788191	3.44116
56	1.15564	0.624117	1.01794	1.45025		0.868916	1.16284	0.737168	2.80807
57		0.534328	0.50559	5.37676		0.816954	1.16834	0.681064	1.4912
58		0.350054	2.22419	0.864052		0.879164		0.690247	1.15209
59		1.33396	1.08661	1.03184		0.650191		0.912719	0.443725
60		0.513864	0.625986	1.56021				1.37308	1.15437
61		1.73162	0.508315	1.40006				0.704921	1.32371
62		2.50539	0.520014	1.00224				0.914335	0.883145
63		0.730579	0.676867	0.587202				0.45737	0.559298
64		1.02539	1.1579	0.703295				0.8445	0.8144
65		1.74569	0.937	1.42586				0.98154	1.6868
66		1.43777	1.6639	1.85646				1.23757	1.42608
67		3.68948	1.28141	1.05869				1.49232	1.80601
68		2.58838	0.80079	1.9706				1.78495	1.40629
69		2.63201	0.755778	1.02386				1.68412	3.59618
70		1.08358	1.12909	3.04129				2.27757	1.38683
71		2.36955	1.04853	0.936659				2.23821	1.83564
72		1.28715	0.951316	0.672612				0.619947	0.819396
73		0.623971	0.408888	1.07683				0.952269	1.87112
74		1.9255	1.29978	1.093				1.41261	0.857478
75		0.458941	1.7516	1.76349				0.880589	0.90961
76		0.636485	0.735322	1.57946				0.496586	1.01493
77		0.714503	0.95122	1.70072				0.916484	0.979169
78		1.4013	0.747426	0.931632				0.823217	1.16847
79		2.31047	0.866385	2.26098				1.04665	1.4771
80		0.887703	1.02013	0.762247				0.567302	1.91128
81		2.59595	1.0136	0.684053				0.602171	3.64637
82		3.8324	1.08456	0.547439				0.953564	1.64737
83		3.68254	0.853657	0.705441				0.921671	1.353
84		0.401159	2.3749	0.899552				0.942227	3.47078
85		0.802164	1.28868	2.12006				1.26684	0.693815
86		0.376305	1.303	2.07449				0.948522	1.29567
87		1.35499	0.693321	1.27				0.582739	1.62349
88		1.22252	0.520192	0.596955				1.48313	6.01411
89		0.409076	0.923352	0.499592				1.23804	0.775663
90		0.676461	0.606744	0.794317				1.40404	0.695454
91		0.582483	0.707429	1.18743				0.969197	0.701091
92		0.904746	0.613642	0.873165				0.60755	1.41897
93		0.685473	1.71095	0.908656				0.958257	1.11697
94		0.775134	0.988091	1.38899				1.047	2.20382
95		0.865055	1.31954	0.478379				0.657862	1.29818
96			0.957245	0.631381				1.22994	1.16751
97			0.727702	0.327981				0.595338	1.95751
98			1.65882	0.577951				0.659641	0.942988
99			1.30485	0.83323				1.20482	1.26841
100			0.979527	1.73814				0.484556	0.917914
101			0.827351	0.957828				0.968589	4.37909
102			1.03615	0.773282				0.821532	4.30759
103			0.670943	0.873003				1.01951	2.01419
104			0.761962	2.62041				0.64959	6.35591
105			1.04403	2.60369				0.797495	2.68759
106			1.39455	1.72055				1.3815	1.63336
107			0.787108	0.628562				0.749688	4.78266
108			0.840876	1.98062				1.23765	1.37895
109			0.497411	1.059				1.64124	1.30728
110			1.22099	0.815396				1.41602	1.10001
111			1.16335	1.52876				0.743466	0.636001
112			0.930471	0.86063				2.05064	0.834365
113			1.05072	1.86106				0.984698	0.420368
114			1.43356	0.623409				1.05596	0.549839
115			0.465142	3.27687				0.76667	0.96841
116			0.53775	3.33523				0.91276	1.13222
117			0.755435	0.845892				0.718272	1.55311
118			1.08694	1.63394				1.13025	1.57888
119			1.3238	2.67767				1.13372	1.4013
120			1.1748	1.43184				0.7384	1.32768
121			0.837605	1.33326				1.39076	2.63427
122			3.01876	1.08677				0.982229	0.949829
123			0.597654	0.800984				1.27058	0.589636
124			1.09765	0.812732				0.535137	0.704342
125			0.645578	3.10518				0.823562	0.497206
126			0.717123	2.13322				0.988473	0.530011
127			0.5229	1.76939				1.44467	0.87276
128			1.06995	1.57834				1.40061	1.00893
129			0.900471	1.27916				1.07677	1.85872
130			0.667291	0.776304				1.5742	1.81659
131			0.819689	1.17413				3.06721	0.670944
132			1.13653	2.02069				1.00105	0.823235
133			0.705224	0.890521				1.25378	0.971278
134			1.18629	1.44967				0.849073	1.21772
135			1.39631	1.40682				0.912792	1.94524
136			1.4829	1.58515				0.789432	1.05513
137			2.75777	1.99637				0.894909	2.04115
138			1.64335	3.00461				0.876828	0.943712
139			1.91249	4.6415				0.88527	0.781539
140			3.40783	1.4351				0.978562	0.74987
141			2.50763	3.76453				1.09914	0.906924
142			1.09658	4.33649				1.22286	0.884771
143			1.07705	1.28286				1.0614	2.08245
144			1.37812	2.61515				1.29717	1.38001
145			2.34407	1.73704				0.583222	1.27896
146			1.24808	1.80794				1.00254	1.72834
147			1.48999	1.96772				0.639831	1.00281
148			2.28705	1.54492				0.782575	0.9508
149			0.750626	2.29364				0.859303	0.917461
150			0.756421	1.06192				3.4767	0.380928
151			0.681774	1.04194				1.17105	0.867465
152			1.62898	1.51673				1.06609	2.37214
153			1.1313	3.06051				0.764484	5.21483
154			1.218	0.970943				1.06623	0.93226
155			0.661782	1.90814				1.896	0.322301
156			2.67483	0.586107				1.38257	1.77373
157			1.64718	1.88163				0.864114	1.25738
158			1.25841	1.59548				0.932495	1.89674
159			0.894899	4.00421				2.12394	5.53733
160			0.89454	0.608504				0.981326	1.1781
161			0.823567	1.28086				1.04573	0.759406
162			0.745472	0.718701				2.05039	1.49492
163			0.787264	0.626767				0.729371	0.523916
164			1.11742	0.565468				0.696993	1.60976
165			0.879692	0.872336				0.98987	1.09317
166			2.50286	1.57018				0.585938	1.16782
167			1.92484	1.43245				0.835598	0.755258
168			3.1838	1.28627				1.15457	1.56114
169			1.39654	0.571915				1.62765	2.21576
170			1.59313	0.491268				1.49672	2.98974
171			3.36268	1.44012				0.916516	2.07647
172			1.04088	0.92395				1.08022	1.84192
173			2.83487	1.1465				1.52641	0.883927
174			0.905894	1.51353				0.627788	0.796639
175			2.03176	0.763991				1.75585	2.03071
176			1.75259	1.3043				1.03475	1.80733
177			0.847195	0.741211				2.30192	1.53412
178			1.08524	1.20849				0.658471	1.05311
179			1.63981	0.826298				0.959835	0.718024
180			1.89454	1.60078				0.788448	1.07628
181			1.40616	0.347997				1.25204	0.817885
182			1.12795	5.60891				1.26661	0.740588
183			0.923803	0.786166				1.62241	0.72716
184			1.01632	0.723515				0.732948	0.714729
185			1.98286	9.8709				1.45117	0.879512
186			0.612668	4.0111				0.957976	0.458195
187			1.12802	7.66995				2.4422	5.74871
188			0.691394	3.65436				1.09537	4.30051
189			1.06069	11.7455				1.16675	1.01168
190			0.959279	2.24592				0.814187	2.56943
191			0.859357	0.711408				1.79966	1.04275
192			1.08231	0.964622				0.69906	0.866674
193			0.539851	0.560282				1.11482	1.37817
194			1.31009	0.744826				1.50153	6.21349
195			0.746353	0.625421				0.712299	2.19834
196			1.02106	1.08217				1.33468	8.28795
197			0.758398	0.985952				1.49188	0.917393
198			0.515635	1.6256				1.62615	1.43387
199			0.574276	1.3991				0.563874	1.25351
200			0.695779	1.59775				0.915072	2.46595
201			3.26435	1.28292				0.793127	0.821238
202			0.667405	2.14566				1.32322	0.669374
203			1.09733	2.49096				1.26536	0.760958
204			0.567412	0.475059				1.21441	0.440002
205			0.75808	0.466575				0.874088	1.93513
206			0.783817	0.629083				1.64217	3.01221
207			0.566232	2.18213				2.07284	1.59089
208			0.770541	0.719086				0.904298	2.65606
209			0.98815	0.546571				1.1917	0.728179
210			1.32034	1.1395				0.533964	0.762097
211			1.30409	1.48463				0.643155	0.572636
212			0.786178	3.512				0.635582	1.09158
213			0.715866	1.32067				0.649401	2.87551
214			2.37752	1.90076				1.69976	1.97524
215			1.67238	4.23779				1.02638	1.40944
216			1.72508	1.06453				1.00797	1.11187
217			1.15283	0.608705				0.936044	0.765667
218			1.10806	1.12473				0.654585	1.74274
219			1.09365	1.7773				1.48266	0.694965
220			0.870935	0.449425				1.15127	2.08419
221			0.685441	0.923781				1.21061	1.9173
222			0.745245	0.62376				1.93497	1.2837
223			0.499517	1.2045				0.783978	1.01275
224			0.75198	0.827081				1.41325	0.623
225			1.33536	0.914985				1.06144	3.29428
226			0.921694	0.65897				0.805958	0.732832
227			1.04404	0.630889				0.650401	2.08585
228			0.882641	0.727533				0.796223	1.71195
229			0.917897	1.63105				2.84118	1.58456
230			1.46017	0.758705				0.862745	0.886116
231			1.33896	0.738633				0.625274	1.37467
232			2.09256	1.44517				0.939251	2.6942
233			0.873739	0.873523				1.30758	0.355666
234			2.45843	0.580595				0.691814	2.51735
235			0.587721	0.73174				1.17611	1.89054
236			0.898081	0.446131				1.46373	0.922237
237			0.900006	0.487679				0.701232	0.982877
238			1.44085	0.533483				1.15429	1.48292
239			1.44845	0.987583				2.09697	1.80736
240			1.82985	0.972352				1.33719	2.48657
241			1.54305	0.748986				0.756109	0.689623
242			0.779199	1.08358				0.96643	1.49366
243			4.63658	0.491854					2.61191
244				1.97412					2.7977
245				1.52724					1.62405
246				0.499376					0.919956
247				2.42137					1.48379
248				0.929393					2.26392
249				0.61682					0.874269
250				0.505512					2.17494
251				0.548177					1.4506
252				0.435769					1.65254
253				2.55435					0.59011
254				0.614944					1.23998
255									0.413948

## Sheet: Figure 1D-Signal Area
	Layer I					Layer II/III
	Somata		Processes			Somata		Processes
	Lck-6f	Cyto-6s	Lck-6f	Cyto-6s		Lck-6f	Cyto-6s	Lck-6f	Cyto-6s
1	2.48691	2.54737	6.91955	21.1897		3.26431	2.19051	1.72268	1.51674
2	0.647311	8.36172	2.38212	16.6559		1.33414	6.15213	1.83015	0.56739
3	1.62358	8.43043	2.29762	3.04527		0.313154	23.2904	0.958252	1.98217
4	6.05115	3.19688	1.52691	43.9122		0.614115	1.94713	0.74753	2.39882
5	0.350467	0	3.44678	3.89117		0	3.20355	1.16139	1.11144
6	0.893413	1.79752	3.39308	2.32466		1.16709	3.35033	0.841355	0.748595
7	1.23798	15.3556	3.52008	8.30404		4.05377	10.8157	0.804194	0.64283
8	1.09214	6.37627	1.34669	19.2325		5.04338	0	1.47096	1.18561
9	4.07656	11.5837	2.26818	28.1984		4.3219	1.78409	1.43069	1.53486
10	4.03279	8.56141	6.70031	4.06266		0.408774	28.4687	0.967192	0.758279
11	0.616603	18.7693	4.14023	33.6147		0.549756	51.1293	1.17862	1.53152
12	1.00576	13.9539	2.22304	6.13734		1.73599	2.50531	1.30077	1.02939
13	1.15655	12.0116	1.48945	2.35528		0.377211	8.9067	0.736754	1.62352
14	2.76426	2.72718	5.78207	2.99408		3.80726	16.4965	0.925254	3.73221
15	0.634956	0	0.981686	43.3412		2.57941	2.33081	0.690852	1.65684
16	3.1142	0.813483	2.24403	11.2419		1.16897	0	1.48102	0.869029
17	1.23991	1.16547	3.1518	63.3453		1.63167	1.14473	0.850687	0.743743
18	2.91651	12.4151	2.96562	55.9923		1.90471	2.42337	0.527288	0.794067
19	3.73152	8.61653	1.2134	30.6335		1.38844	10.8428	1.23717	0.705375
20	1.18662	1.73641	1.1243	15.1916		0.784663	0.474878	1.04061	0.541429
21	3.53996	2.98419	4.19153	45.1063		0.394614	0.594325	1.37234	2.97008
22	0.453129	25.906	9.59061	1.89189		2.28111	5.12869	0.946117	0.537365
23	4.30814	5.4126	1.17584	3.54885		3.26724	1.89919	1.2987	1.2923
24	0.915406	3.58688	2.40241	2.0403		1.17933	9.38772	1.72329	0.902769
25	1.60054	0	0	0.867925		0	5.08659	1.62754	1.04205
26	2.28108	0	0.547871	0.357296		0	43.3045	0.592124	1.6318
27	1.7116	4.51927	1.98067	22.436		6.78108	10.2056	0.747255	2.63983
28	1.40264	17.0121	2.98313	10.9456		1.61066	35.9873	0.735717	1.24143
29	0.985006	2.25382	0	14.0496		1.73013	1.10115	0.528249	3.12583
30	0	4.58237	1.07407	12.0204		3.59786	0	0.517424	0.78085
31	8.88093	12.2892	2.18617	14.4983		2.48627	1.42559	0.828864	0.901239
32	5.06084	1.74392	1.83531	14.9326		4.07777	1.3925	0.674765	0.751453
33	1.22571	0	3.19922	15.58		0.765559	9.0713	0.78223	1.40685
34	11.3329	1.84638	0.890433	8.32112		1.23486	12.3178	0.735325	1.00739
35	1.95566	3.36062	2.53161	3.28624		2.69996	13.2728	0.704932	1.70438
36	2.68423	2.91858	3.74336	16.6777		2.63354	9.29386	0.919924	1.79019
37	0	1.8695	3.58159	7.0347		3.0128	17.086	1.4627	0.688376
38	3.62491	1.63935	1.43292	0.471888		2.39077	26.8427	0.755204	0.539404
39	5.77997	0.633495	3.93455	100.966		1.21053	0	1.18052	1.67134
40	2.65166	6.69481	0.779483	20.344		2.3164	1.09786	1.35116	1.11773
41	5.2205	8.47041	1.61891	49.4246		2.66554	0	1.06128	1.16298
42	1.86184	8.04618	2.68709	37.1143		4.43181	2.02656	1.65301	1.19369
43	10.3501	0.537218	1.10367	19.1198		0.643177	4.41835	1.5735	1.89327
44	6.27503	0.517544	5.49189	2.84362		0.849717	2.79807	0.64694	1.58916
45	7.58446	3.49486	1.4995	54.4739		2.02519	2.58343	1.16403	2.04535
46	1.63616	0.963421	1.95337	54.1918		4.88085	7.11654	0.978546	1.00246
47	19.5948	0.517205	28.1645	24.7155		4.01882	6.71058	1.0851	1.035
48	7.07627	1.90842	4.33287	9.06487		0.548665	2.22579	0.86352	0.766439
49	4.88153	0.963795	3.00314	7.5323		4.48814	4.29124	1.09425	0.689251
50	1.65948	1.25688	0.489531	13.924		3.32078	0.346732	0.544628	0.839595
51	5.08085	1.40775	3.05014	8.0015		0.95034	3.35824	0.495003	1.81934
52	4.71998	2.2147	0.800518	3.85264		2.2676	0	1.344	2.0491
53	1.50355	6.23889	1.36769	0.84746		1.65741	0.746027	0.565433	3.36314
54	1.77072	1.66946	4.96078	0.519672		0	13.1411	0.588014	0.877092
55	1.73423	31.0554	1.50437	1.65256		1.92744	2.62125	0.788191	3.44116
56	6.71165	3.37876	2.98651	0.799316		2.11907	3.60208	0.737168	2.80807
57		1.20701	0	1.18195		2.76302	2.94252	0.681064	1.4912
58		0.313703	8.61484	4.89198		2.4831		0.690247	1.15209
59		25.4168	3.43378	3.43965		2.52301		0.912719	0.443725
60		3.9694	0.59856	3.97801				1.37308	1.15437
61		0	1.35261	10.0603				0.704921	1.32371
62		26.6698	0.923006	16.4421				0.914335	0.883145
63		1.27007	2.34204	33.7628				0.45737	0.559298
64		4.05923	4.08858	20.5287				0.8445	0.8144
65		22.5561	3.17511	2.66261				0.98154	1.6868
66		16.1376	9.51619	9.0596				1.23757	1.42608
67		17.5199	3.41666	3.61806				1.49232	1.80601
68		20.0867	1.46127	1.43282				1.78495	1.40629
69		31.456	1.80477	20.5469				1.68412	3.59618
70		28.4931	2.55728	1.75279				2.27757	1.38683
71		27.2494	5.35013	0.540598				2.23821	1.83564
72		3.42648	3.72569	1.16697				0.619947	0.819396
73		3.29487	2.27866	22.4187				0.952269	1.87112
74		12.0182	5.05467	6.23969				1.41261	0.857478
75		3.64642	4.2008	0.559476				0.880589	0.90961
76		1.08345	2.62523	30.7111				0.496586	1.01493
77		2.85577	2.68048	23.5796				0.916484	0.979169
78		7.50078	1.26612	17.7174				0.823217	1.16847
79		28.3123	2.57136	5.4126				1.04665	1.4771
80		7.9495	1.58128	6.81925				0.567302	1.91128
81		18.9345	2.9509	8.27152				0.602171	3.64637
82		5.04266	6.17509	2.54915				0.953564	1.64737
83		56.6317	4.20007	4.72274				0.921671	1.353
84		10.3959	19.64	5.22936				0.942227	3.47078
85		1.62435	2.16496	10.9779				1.26684	0.693815
86		1.18712	6.51948	12.1287				0.948522	1.29567
87		1.35499	2.64052	44.4819				0.582739	1.62349
88		1.22252	0.509724	8.95654				1.48313	6.01411
89		0.409076	1.47145	9.44703				1.23804	0.775663
90		0.676461	1.98101	19.2436				1.40404	0.695454
91		0.582483	2.03155	0.745532				0.969197	0.701091
92		0.904746	1.87486	8.1238				0.60755	1.41897
93		0.685473	5.11569	0.351181				0.958257	1.11697
94		0.775134	3.65757	1.0251				1.047	2.20382
95		0.865055	4.73167	7.44645				0.657862	1.29818
96			3.40142	19.0319				1.22994	1.16751
97			2.82514	14.4067				0.595338	1.95751
98			7.87533	9.15823				0.659641	0.942988
99			3.77293	12.2908				1.20482	1.26841
100			3.52461	28.963				0.484556	0.917914
101			2.22634	3.69483				0.968589	4.37909
102			5.87763	0.493263				0.821532	4.30759
103			1.91698	5.4462				1.01951	2.01419
104			1.2122	28.7473				0.64959	6.35591
105			2.80985	1.65308				0.797495	2.68759
106			7.08101	6.7299				1.3815	1.63336
107			5.50278	13.284				0.749688	4.78266
108			2.26375	22.695				1.23765	1.37895
109			0.890771	10.4975				1.64124	1.30728
110			7.36595	8.83151				1.41602	1.10001
111			3.39729	1.22114				0.743466	0.636001
112			2.13376	1.26692				2.05064	0.834365
113			4.38186	2.08826				0.984698	0.420368
114			6.89595	3.62771				1.05596	0.549839
115			0.437796	2.7193				0.76667	0.96841
116			0.532778	10.8636				0.91276	1.13222
117			3.20221	3.87047				0.718272	1.55311
118			2.10159	2.41948				1.13025	1.57888
119			4.33929	2.93444				1.13372	1.4013
120			2.4747	3.66179				0.7384	1.32768
121			3.17213	2.08765				1.39076	2.63427
122			5.5839	0				0.982229	0.949829
123			2.74256	1.58246				1.27058	0.589636
124			3.54116	0.4744				0.535137	0.704342
125			0	4.91816				0.823562	0.497206
126			0.876735	1.46669				0.988473	0.530011
127			1.41816	7.4305				1.44467	0.87276
128			3.8074	0.989282				1.40061	1.00893
129			0.907232	1.42365				1.07677	1.85872
130			4.06938	1.71156				1.5742	1.81659
131			0.765065	7.8947				3.06721	0.670944
132			8.50664	1.20354				1.00105	0.823235
133			1.53285	1.22826				1.25378	0.971278
134			0.827073	0.512958				0.849073	1.21772
135			2.86624	0.743802				0.912792	1.94524
136			4.60528	0				0.789432	1.05513
137			14.4413	2.69744				0.894909	2.04115
138			3.74784	0				0.876828	0.943712
139			4.85354	0.877918				0.88527	0.781539
140			8.71408	0.876835				0.978562	0.74987
141			24.3855	2.87594				1.09914	0.906924
142			2.25453	30.277				1.22286	0.884771
143			5.69851	1.40059				1.0614	2.08245
144			4.20765	0.906228				1.29717	1.38001
145			2.70399	33.5002				0.583222	1.27896
146			7.58737	0.428049				1.00254	1.72834
147			7.2128	6.89759				0.639831	1.00281
148			4.46158	1.6979				0.782575	0.9508
149			0.647305	1.57925				0.859303	0.917461
150			2.73657	19.2208				3.4767	0.380928
151			3.03386	1.15475				1.17105	0.867465
152			10.967	0.664763				1.06609	2.37214
153			4.63659	0.968377				0.764484	5.21483
154			8.06464	9.21459				1.06623	0.93226
155			2.91457	15.7196				1.896	0.322301
156			7.87246	0				1.38257	1.77373
157			6.00783	2.39344				0.864114	1.25738
158			4.03997	34.3675				0.932495	1.89674
159			6.67251	2.009				2.12394	5.53733
160			2.73809	6.37414				0.981326	1.1781
161			5.64222	1.60656				1.04573	0.759406
162			1.55344	2.47497				2.05039	1.49492
163			4.05199	3.09858				0.729371	0.523916
164			2.4838	3.18138				0.696993	1.60976
165			1.8823	19.4959				0.98987	1.09317
166			12.4686	5.76563				0.585938	1.16782
167			8.61353	8.27433				0.835598	0.755258
168			32.0721	1.56163				1.15457	1.56114
169			11.2503	5.33319				1.62765	2.21576
170			15.3446	3.64659				1.49672	2.98974
171			6.35759	1.45881				0.916516	2.07647
172			3.19128	3.24359				1.08022	1.84192
173			30.532	3.0076				1.52641	0.883927
174			9.45946	11.6751				0.627788	0.796639
175			11.658	1.20415				1.75585	2.03071
176			3.5074	14.905				1.03475	1.80733
177			1.86901	30.9817				2.30192	1.53412
178			5.47182	0.841548				0.658471	1.05311
179			7.32427	6.27326				0.959835	0.718024
180			1.06672	12.12				0.788448	1.07628
181			5.96146	4.82981				1.25204	0.817885
182			3.5767	5.69943				1.26661	0.740588
183			4.0402	6.26532				1.62241	0.72716
184			4.30523	1.06598				0.732948	0.714729
185			2.9908	3.16203				1.45117	0.879512
186			3.83293	45.7458				0.957976	0.458195
187			0.697043	18.0508				2.4422	5.74871
188			4.96835	3.12494				1.09537	4.30051
189			3.4168	5.08465				1.16675	1.01168
190			2.83146	4.21054				0.814187	2.56943
191			3.51308	2.10384				1.79966	1.04275
192			4.48615	3.07666				0.69906	0.866674
193			2.24781	12.0154				1.11482	1.37817
194			1.63507	5.85097				1.50153	6.21349
195			4.15149	3.93738				0.712299	2.19834
196			2.77123	7.63359				1.33468	8.28795
197			6.52335	5.7835				1.49188	0.917393
198			0.502806	37.1527				1.62615	1.43387
199			1.81394	17.2684				0.563874	1.25351
200			1.84874	58.6246				0.915072	2.46595
201			14.671	3.2404				0.793127	0.821238
202			2.56149	44.4823				1.32322	0.669374
203			2.6153	95.2402				1.26536	0.760958
204			2.87003	2.73647				1.21441	0.440002
205			1.18153	7.30824				0.874088	1.93513
206			2.42358	12.7775				1.64217	3.01221
207			2.18271	17.6954				2.07284	1.59089
208			1.31922	6.59695				0.904298	2.65606
209			2.60307	10.4321				1.1917	0.728179
210			6.51771	11.7428				0.533964	0.762097
211			4.84641	6.09323				0.643155	0.572636
212			2.49618	4.78391				0.635582	1.09158
213			2.57517	18.2214				0.649401	2.87551
214			7.37368	4.53035				1.69976	1.97524
215			10.0553	7.5358				1.02638	1.40944
216			8.66043	13.5837				1.00797	1.11187
217			2.91027	6.70062				0.936044	0.765667
218			3.59398	12.2707				0.654585	1.74274
219			2.91903	21.2197				1.48266	0.694965
220			2.20232	10.1396				1.15127	2.08419
221			2.5383	17.4746				1.21061	1.9173
222			1.94185	5.82831				1.93497	1.2837
223			1.03233	8.52149				0.783978	1.01275
224			0.63471	12.7546				1.41325	0.623
225			5.73549	1.79004				1.06144	3.29428
226			2.56338	5.76612				0.805958	0.732832
227			2.67265	1.21094				0.650401	2.08585
228			1.06159	63.3386				0.796223	1.71195
229			5.32129	14.1141				2.84118	1.58456
230			9.23186	5.44449				0.862745	0.886116
231			7.16071	18.6159				0.625274	1.37467
232			12.663	12.8541				0.939251	2.6942
233			2.09026	11.0669				1.30758	0.355666
234			9.65291	7.40792				0.691814	2.51735
235			0.533925	3.05079				1.17611	1.89054
236			4.10416	2.27901				1.46373	0.922237
237			3.68492	5.92317				0.701232	0.982877
238			2.42166	35.6632				1.15429	1.48292
239			5.79785	7.14588				2.09697	1.80736
240			15.9176	1.37943				1.33719	2.48657
241			11.19	0				0.756109	0.689623
242			4.16345	0.453214				0.96643	1.49366
243			13.9117	6.77987					2.61191
244				0.595103					2.7977
245				3.93949					1.62405
246				6.71848					0.919956
247				28.4663					1.48379
248				2.40107					2.26392
249				9.46039					0.874269
250				37.6207					2.17494
251				2.65052					1.4506
252				2.29284					1.65254
253				6.50145					0.59011
254				6.8259					1.23998
255									0.413948
