# Supplementary material for: Microglial calcium signaling is attuned to neuronal activity in awake mice
Source: eLife. 2020 Jul 27;9:e56502. doi: 10.7554/eLife.56502 (PMC7402678; doi:10.7554/eLife.56502)
Supplement: Figure 2—source data 1. [file elife-56502-fig2-data1.xlsx]

## Sheet: Figure 2B-Sholl Analysis
Shell distance (microns)																																	Shell distance (microns)
	Acute Window																																	Chronic Window
	Cell 1	Cell 2	Cell 3	Cell 4	Cell 5	Cell 6	Cell 7	Cell 8	Cell 9	Cell 10	Cell 11	Cell 12	Cell 13	Cell 14	Cell 15	Cell 16	Cell 17	Cell 18	Cell 19	Cell 20	Cell 21	Cell 22	Cell 23	Cell 24	Cell 25	Cell 26	Cell 27	Cell 28	Cell 29	Cell 30	Cell 31			Cell 1	Cell 2	Cell 3	Cell 4	Cell 5	Cell 6	Cell 7	Cell 8	Cell 9	Cell 10	Cell 11	Cell 12	Cell 13	Cell 14	Cell 15	Cell 16
10	4*	6	4	4	5	7	5	6	8	6	5	7	4	2	5	5	4	3	5	3	6	3	3	2	5	6	7	7	6	3	2		10	3	3	6	4	4	4	4	4	2	3	6	3	6	4	5	5
12.5	3	4	4	6	6	4	9	5	9	6	6	7	3	3	5	10	8	9	8	4	5	4	2	3	7	5	6	4	6	2	4		12.5	6	2	9	4	5	5	4	3	4	5	7	3	8	3	2	4
15	4	6	5	8	2	5	6	5	7	8	5	6	4	2	7	8	5	8	9	4	7	4	1	6	4	6	5	6	7	1	3		15	5	3	6	5	2	8	9	6	7	2	8	4	5	5	4	4
17.5	7	8	7	6	11	2	4	7	4	6	8	7	5	4	6	9	7	6	10	5	3	4	5	5	5	4	5	12	5	2	4		17.5	5	4	7	5	3	6	9	3	5	2	5	2	5	5	4	3
20	6	7	7	6	3	5	1	4	6	4	4	5	4	3	8	6	5	6	8	8	4	8	3	4	9	6	11	6	9	3	4		20	6	5	7	4	1	10	7	5	5	5	5	5	9	7	7	3
22.5	6	8	7	4	5	7	2	4	8	4	3	1	4	7	8	6	5	4	13	4	4	7	4	5	8	7	10	7	10	3	5		22.5	8	7	10	7	1	6	6	2	5	6	4	5	13	4	10	3
25	11	10	3	5	3	3	1	3	4	3	6	2	3	8	10	5	4	4	12	7	5	13	4	2	5	10	11	6	8	5	6		25	7	8	10	3	2	6	5	1	4	8	5	8	7	4	8	4
27.5	7	10	4	6	5	3	1	7	2	2	4	2	2	6	5	4	1	2	13	7	4	12	4	1	3	6	9	4	7	5	5		27.5	6	5	12	2	1	9	2	2	4	7	2	10	6	2	10	7
30	9	8	1	6	3	0	0	7	2	3	3	2	2	5	4	3	0	1	3	4	5	9	5	2	4	10	12	4	9	8	3		30	4	5	8	3	1	7	3	3	5	5	4	8	10	1	5	4
32.5	5	6	0	4	4	0	0	3	0	1	3	0	2	8	3	3	0	0	3	4	4	5	1	1	2	7	9	5	2	4	0		32.5	4	2	8	1	1	6	2	1	4	5	3	6	5	1	3	3
35	6	7	0	6	3	0	0	0	0	0	3	0	2	5	4	2	0	0	1	6	3	6	1	1	1	5	9	2	3	4	0		35	2	1	8	3	2	4	1	2	1	9	3	4	3	1	2	2
37.5	5	3	0	5	2	0	0	0	0	0	3	0	1	4	3	2	0	1	0	4	5	4	0	1	1	8	10	1	1	5	0		37.5	2	0	5	2	1	5	2	3	0	6	3	3	1	1	1	0
40	6	3	0	5	2	0	0	0	0	0	1	0	0	4	2	1	0	2	0	2	3	3	1	0	1	8	4	3	1	6	0		40	1	0	6	1	4	2	2	4	0	7	1	4	1	1	1	0
42.5	4	3	0	4	0	0	0	0	0	0	4	0	0	2	1	4	0	2	0	3	0	3	1	0	1	4	1	2	0	3	0		42.5	1	0	3	0	2	1	3	5	0	5	0	4	1	0	2	0
45	3	1	0	5	0	0	0	0	0	0	2	0	0	2	0	1	0	0	0	1	0	4	1	0	0	1	1	1	0	3	0		45	0	0	3	0	3	0	2	4	0	2	0	2	0	0	1	0
47.5	3	1	0	8	0	0	0	0	0	0	1	0	0	2	0	1	0	0	0	2	0	2	1	0	0	3	1	2	0	1	0		47.5	0	0	5	0	5	0	1	3	0	0	0	0	0	0	0	0
50	4	0	0	8	0	0	0	0	0	0	0	0	0	3	0	0	0	0	0	3	0	0	0	0	0	0	2	4	0	1	0		50	0	0	6	0	3	0	0	3	0	0	0	0	0	0	0	0
52.5	3	0	0	5	0	0	0	0	0	0	0	0	0	2	0	0	0	0	0	2	0	1	0	0	0	0	2	1	0	1	0		52.5	0	0	4	0	1	0	0	0	0	0	0	0	0	0	0	0
55	2	0	0	4	0	0	0	0	0	0	0	0	0	1	0	0	0	0	0	2	0	0	0	0	0	0	2	0	0	1	0		55	0	0	2	0	0	0	0	0	0	0	0	0	0	0	0	0
57.5	2	0	0	3	0	0	0	0	0	0	0	0	0	0	0	0	0	0	0	2	0	0	0	0	0	0	2	0	0	0	0		57.5	0	0	1	0	0	0	0	0	0	0	0	0	0	0	0	0
60	2	0	0	2	0	0	0	0	0	0	0	0	0	0	0	0	0	0	0	2	0	0	0	0	0	0	2	0	0	0	0		60	0	0	1	0	0	0	0	0	0	0	0	0	0	0	0	0
62.5	2	0	0	3	0	0	0	0	0	0	0	0	0	0	0	0	0	0	0	3	0	0	0	0	0	0	1	0	0	0	0		62.5	0	0	0	0	0	0	0	0	0	0	0	0	0	0	0	0
65	1	0	0	3	0	0	0	0	0	0	0	0	0	0	0	0	0	0	0	3	0	0	0	0	0	0	1	0	0	0	0		65	0	0	0	0	0	0	0	0	0	0	0	0	0	0	0	0
67.5	0	0	0	2	0	0	0	0	0	0	0	0	0	0	0	0	0	0	0	2	0	0	0	0	0	0	0	0	0	0	0		67.5	0	0	0	0	0	0	0	0	0	0	0	0	0	0	0	0
70	0	0	0	0	0	0	0	0	0	0	0	0	0	0	0	0	0	0	0	2	0	0	0	0	0	0	0	0	0	0	0		70	0	0	0	0	0	0	0	0	0	0	0	0	0	0	0	0
72.5	0	0	0	0	0	0	0	0	0	0	0	0	0	0	0	0	0	0	0	3	0	0	0	0	0	0	0	0	0	0	0		72.5	0	0	0	0	0	0	0	0	0	0	0	0	0	0	0	0
75	0	0	0	0	0	0	0	0	0	0	0	0	0	0	0	0	0	0	0	2	0	0	0	0	0	0	0	0	0	0	0		75	0	0	0	0	0	0	0	0	0	0	0	0	0	0	0	0
77.5	0	0	0	0	0	0	0	0	0	0	0	0	0	0	0	0	0	0	0	0	0	0	0	0	0	0	0	0	0	0	0		77.5	0	0	0	0	0	0	0	0	0	0	0	0	0	0	0	0
80	0	0	0	0	0	0	0	0	0	0	0	0	0	0	0	0	0	0	0	0	0	0	0	0	0	0	0	0	0	0	0		80	0	0	0	0	0	0	0	0	0	0	0	0	0	0	0	0
	*values denote the number of branch point intersections at each shell distance from soma
[truncated: 15 more columns]

## Sheet: Figure 2F-Max Amplitude
	Layer I					Layer II/III
	Somata		Processes			Somata		Processes
	Acute	Chronic	Acute	Chronic		Acute	Chronic	Acute	Chronic
1	0.998681	1.33144	2.32541	0.802074		0.705693	0.497984	1.82355	2.88464
2	2.7166	1.24134	2.72388	1.11996		1.1203	0.82351	0.528419	0.755563
3	1.29159	0.477289	0.968226	1.43406		0.287178	0.632346	1.89786	1.03812
4	0.845519	1.86712	3.72464	1.11532		0.569969	0.766887	2.51125	1.47564
5	0.910328	1.35504	1.03122	1.40219		0.672856	0.611438	1.11094	1.0898
6	0.772549	0.70869	1.19638	1.89113		0.871226	2.01446	0.688573	2.85425
7	2.24298	1.13702	2.95682	1.73325		1.37946	1.4431	0.755347	1.03599
8	0.74966	0.907147	3.85223	2.37213		1.00739	0.734821	1.08309	1.69528
9	4.65647	0.888717	2.73415	2.02053		0.785238	0.939428	1.47129	1.0451
10	1.69541	1.23812	1.22005	0.643429		1.66533	1.07049	0.822645	0.316304
11	2.25108	0.686251	2.06962	0.820149		3.63659	0.781879	0.740808	1.86183
12	1.82498	1.59912	1.11767	3.09136		0.559962	1.46159	1.02497	1.25485
13	4.29217	1.89344	1.26408	1.4892		0.976984	1.17226	1.1668	1.05551
14	1.4628	2.97037	0.792957	0.594526		0.911047	0.71627	3.56658	0.485066
15	0.897798	2.30362	5.13617	0.693276		1.05625	0.96426	1.6554	2.48344
16	0.56614	0.389085	1.47963	0.426235		0.659023	0.87246	1.1166	0.512233
17	0.513257	1.99735	5.69533	1.14039		1.28184	0.557233	0.578401	0.836829
18	2.5343	2.03001	2.73687	1.31668		0.68416	0.636899	0.761133	0.46468
19	1.25434	0.668907	2.41748	0.624035		1.60647	1.03066	0.74271	1.24345
20	1.04204	1.1535	1.01971	1.32965		0.607472	0.633435	0.50621	0.781689
21	1.16682	0.454364	2.08871	0.378001		1.39374	0.896491	2.80391	0.54595
22	4.69199	0.347841	0.947437	1.73454		1.34055	0.66792	0.508827	0.483908
23	1.34424	0.616618	0.608219	1.18642		2.96234	1.50183	1.84806	0.841381
24	1.03522	0.365769	0.547186	0.539197		1.99448	1.10795	0.782737	0.594086
25	1.06176	1.07566	0.44531	0.838616		0.976373	1.02221	0.821719	0.982034
26	0.427053	0.807269	0.357296	0.907123		0.52916	0.660101	1.66355	2.04017
27	1.07318	0.694727	2.34019	1.1095		0.806497	0.878911	2.73217	0.422398
28	1.63795	0.69586	1.51857	2.04014		0.511543	0.464753	0.935068	1.4804
29	0.610629	0.561734	1.61093	0.745582		0.730904	0.994185	2.79705	0.792222
30	1.1531	1.58046	2.25864	0.898959		2.03494	0.883128	0.941563	3.64708
31	1.9342	0.79887	2.15917	0.692007		1.19043	0.582497	1.14428	1.77858
32	0.760948	1.03285	6.7157	0.985114		2.87904	0.927904	0.915055	2.11672
33	0.535565	0.786049	1.31077	0.904844		0.606828	0.466338	1.37539	3.50789
34	0.760683	1.5907	1.11929	1.05896		0.736038	0.604006	0.934198	2.53074
35	1.5458	0.584213	1.09562	0.628633		0.75068	1.66427	1.4304	1.12675
36	1.00198	1.2885	2.95586	0.780764		0.513626	0.979547	1.82975	0.389073
37	0.465352	1.48683	1.78598	1.06987		0.657233	0.683803	0.763917	0.910015
38	0.509775	1.03268	0.471888	0.941913		0.807478	2.564	0.56541	1.36093
39	1.13945	1.00489	3.33795	1.77252		0.971819	2.10426	1.38405	1.73563
40	1.41095	0.361129	1.84166	1.84877		0.902353	2.40735	0.730841	0.435447
41	2.01366	2.16604	3.67338	2.22352		0.652977	1.2609	1.25849	1.93919
42	1.49007	1.54112	3.02114	1.93793		1.43903	2.03529	0.964512	1.09478
43	0.750225	0.77395	2.93135	0.630914		0.821395	0.529204	1.62217	1.16115
44	0.586093	2.05217	1.47743	0.664934		1.20716	2.5877	1.42339	1.39629
45	1.25997	1.23641	2.08738	0.793323		0.804078	0.739433	1.92391	0.862602
46	0.397117	0.629283	2.01918	1.27857		0.349803	1.45313	1.16411	1.78127
47	0.44576	1.07247	2.02056	0.7283		0.428694	1.45175	1.01376	1.82754
48	0.478556	0.651048	1.66138	0.643907		0.298767	2.43378	0.675637	1.20775
49	0.451056	3.20975	1.41095	0.64255		0.386889	1.348	0.567445	0.930823
50	0.434357	0.429385	1.25603	1.02691		0.574544	0.77038	0.866103	0.870783
51	0.483683	2.87308	0.831173	1.21511		0.510009	1.11923	1.78323	2.54349
52	0.546735	0.621533	0.628283	1.79721		0.931268	0.74008	1.01162	0.919655
53	0.609595	0.94968	0.434332	0.808574		0.499034	2.24879	1.48077	1.24344
54	0.524475	1.88373	0.519672	0.897221		1.68752	1.85663	1.41843	0.647492
55	4.15857	0.473289	0.868088	0.696411		0.675765	0.942285	1.74041	1.21576
56	0.624117	1.1445	0.799316	1.6248		1.16284	0.690222	0.614372	0.410631
57	0.534328	0.869929	0.608228	4.30973			3.71178	0.910297	1.79036
58	0.350054	1.30088	1.50131	2.3819			7.24263	1.35291	0.915872
59	1.33396	2.24706	0.619244	1.50882			3.03744	1.719	1.52691
60	0.513864	0.835093	0.517195	0.870262			0.943346	4.92405	0.565725
61	1.73162	0.621323	1.26313	1.43064			2.85395	0.571973	1.84291
62	2.50539	1.07404	1.63776	0.63985			0.555093	2.45522	0.745391
63	0.730579	2.65189	2.42345	1.03186			1.65104	1.97154	1.13873
64	1.02539	0.463507	2.47646	1.00377			0.630815	0.542185	1.36755
65	1.74569	0.39704	0.756346	1.46343			0.434028	1.15609	1.40964
66	1.43777	0.491164	1.20162	1.0532			0.644807	0.399629	0.998513
67	3.68948	1.13485	0.973238	0.878009			0.528155	2.03986	1.33129
68	2.58838	0.556071	0.765474	0.966813				0.997644	0.959426
69	2.63201	0.28515	2.10346	0.530952				1.21439	0.762883
70	1.08358	0.860559	0.633523	0.60778				0.555282	0.797282
71	2.36955	0.397422	0.540598	0.680719				0.908209	1.11681
72	1.28715	0.434062	0.403883	0.706552				0.814741	0.829871
73	0.623971	1.0941	1.411	0.463487				2.04642	1.04939
74	1.9255	0.69145	0.583713	0.729813				0.790641	1.95971
75	0.458941	0.247615	0.559476	0.546947				2.01307	1.28516
76	0.636485	0.679418	2.63548	1.00242				0.695547	0.622379
77	0.714503	0.517901	2.18254	0.444322				1.05457	2.62811
78	1.4013	1.3733	1.32793	1.0525				3.31581	2.20211
79	2.31047	2.0794	1.43631	1.09996				2.5616	3.06158
80	0.887703	2.34188	1.49969	0.709692				2.96247	1.68409
81	2.59595		1.07812	0.603187				2.37758	1.1992
82	3.8324		0.733938	1.26515				1.04076	1.0769
83	3.68254		0.847864	0.455172				1.03251	0.990387
84	0.401159		1.28208	1.19452				1.48516	0.517493
85	0.802164		2.01523	0.935256				1.08048	0.893928
86	0.376305		1.71378	0.487446				1.02729	1.20045
87	1.35499		4.26004	1.13784				1.1948	3.06297
88	1.22252		0.886175	0.618904				3.47485	0.681487
89	0.409076		0.81408	0.563215				1.45863	1.23481
90	0.676461		1.44081	0.586942				1.54983	1.55332
91	0.582483		0.745532	0.52547				0.972075	2.12424
92	0.904746		1.04561	0.489395				2.46868	1.19371
93	0.685473		0.351181	0.376765				0.797265	0.880511
94	0.775134		0.55717	0.473873				2.29851	0.651841
95	0.865055		1.32579	1.43142				2.40383	0.80461
96			1.78515	0.387297				1.57381	0.93614
97			1.17138	0.51993				1.10285	2.87448
98			1.32365	0.884021				0.360931	0.642656
99			0.973258	0.393987				0.999276	0.911412
100			2.66796	0.552038				0.883203	0.802588
101			0.900832	1.11959				0.609443	1.10824
102			0.493263	0.512415				0.479118	1.01569
103			1.01744	0.761425				0.579744	1.04141
104			3.21764	1.41844				1.35346	0.884952
105			0.446097	0.369904				0.942708	0.876753
106			1.70326	1.13831				1.49598	1.77754
107			1.57306	0.520635				1.17638	1.65663
108			1.58427	0.728415				3.40255	2.28571
109			0.766913	1.27445				1.27619	0.917524
110			1.36507	0.483197				1.79607	2.61914
111			0.616989	0.43719				0.615456	1.36171
112			0.69629	0.454886				1.61987	1.69086
113			0.579368	0.791175				0.399631	1.1249
114			0.802399	2.31061				0.896489	1.17142
115			0.920004	0.991787				0.807101	1.20356
116			1.51928	1.2647				1.06431	1.30787
117			1.42209	0.542802				0.786884	0.725757
118			0.82463	1.10754				1.40108	1.63401
119			0.618367	1.0098				1.89612	1.10081
120			0.39179	1.93099				3.60229	1.02687
121			0.548299	2.15273				1.24835	1.49535
122			0.710281	1.78877				0.963042	2.41352
123			0.533584	0.525101				3.13848	1.42202
124			0.4744	0.960107				0.672089	0.571186
125			0.943265	0.40625				1.19943	0.817633
126			0.408997	0.625747				1.09884	0.945485
127			0.596896	1.25991				2.66782	2.69744
128			0.342865	1.86258				0.631468	5.95202
129			0.487977	0.419623				0.57707	1.12769
130			0.601608	0.43268				0.585771	2.89178
131			1.40741	0.414184				1.25293	0.752526
132			0.609338	0.551461				0.796907	0.618239
133			0.63299	0.823965				1.14163	0.608038
134			0.512958	0.784672				1.23693	0.714078
135			0.743802	0.52994				0.592952	1.44657
136			0.397	0.791257				1.59052	1.58636
137			0.608885	4.11167				0.975132	3.82039
138			0.543903	1.37289				1.03136	0.875229
139			0.300374	0.6163				0.683463	0.873161
140			0.446236	0.886225				2.56973	1.59778
141			0.823102	0.48304				3.69557	0.741405
142			2.14262	0.624161				1.94592	4.94838
143			0.37476	0.947112				7.48561	1.72063
144			0.461589	0.947605				2.01619	0.638732
145			2.93883	1.20723				1.80059	0.961707
146			0.428049	1.69434				3.45653	2.02998
147			1.91202	0.960352				0.948596	0.604174
148			1.06601	0.499702				1.14962	1.85477
149			0.895024	1.1704				0.885777	1.44434
150			1.9094	1.01633				0.552009	2.07814
151			0.405322	1.07044				0.71452	1.40069
152			0.355989	0.942782				0.357682	0.611745
153			0.505125	0.811624				0.531015	2.97367
154			1.3315	0.978526				0.630987	1.35423
155			2.32655	0.763636				0.831342	0.498182
156			0.444013	1.04291				1.55185	0.758372
157			0.418112	0.827075				1.49921	0.667835
158			2.6429	1.10865				1.33828	1.29403
159			0.593512	0.827931				0.928412	0.8707
160			1.07336	0.884601				1.80405	1.16821
161			0.553526	1.06402				1.04024	1.96215
162			0.701957	1.22941				0.607049	1.5284
163			0.787157	0.77123				0.656804	2.2528
164			0.795995	0.772517				0.462805	0.468597
165			2.19993	1.28696				0.437339	1.80067
166			1.5631	0.59729				0.570979	1.11007
167			1.79547	1.3843				0.963613	0.770787
168			0.543595	0.741688				2.26991	0.833961
169			1.99335	1.25015				1.74357	1.03551
170			0.957971	1.15383				0.548045	0.654602
171			0.735263	2.71353				0.820244	1.5955
172			1.17162	0.651866				0.8196	0.527282
173			0.763552	1.18148				1.40102	1.39455
174			1.82648	1.23677				1.84962	0.535137
175			0.634473	1.11206				0.92533	0.662697
176			2.32501	0.716656				1.28114	0.692163
177			5.06342	0.824233				0.99894	1.50121
178			0.841548	0.941858				0.838827	0.630777
179			1.4558	0.912278				0.851295	0.807899
180			2.17535	1.07868				1.08128	0.702789
181			1.23399	1.6174				0.991637	0.450535
182			1.05703	1.03917				1.59377	0.961689
183			0.99087	1.08452				1.25169	1.10982
184			0.582508	0.817666				0.925716	1.16513
185			0.778612	1.20355				1.23797	0.36307
186			2.77721	0.914518				0.978868	0.775898
187			1.83242	0.901915				0.737221	0.932635
188			1.13614	1.28898				0.838956	0.862139
189			1.02938	0.642606				0.379918	1.15114
190			1.30028	0.64546				0.696424	0.581423
191			0.837414	0.440492				2.76695	2.21828
192			1.14014	2.1801				4.62158	1.08648
193			2.06351	1.24952				1.42979	1.31951
194			0.849389	2.2575				1.72777	0.95102
195			1.38793	1.03498				1.49009	0.705471
196			1.53027	1.71668				0.826346	1.48564
197			1.2654	0.840117				2.48235	0.63572
198			1.95642	1.47942				0.903339	2.00573
199			2.82571	0.52502				1.08812	0.648962
200			3.43005	1.09501				1.6745	0.371158
201			1.67869	1.28024				0.599126	0.338143
202			3.34441	1.91103				0.577872	0.690374
203			3.97841	0.904468				1.24427	1.28644
204			0.955241	1.61559				1.13632	1.16593
205			2.19536	1.04069				0.504855	0.353007
206			1.66753	0.743885				0.582763	4.77379
207			1.59133	1.43682				0.827863	1.14638
208			1.81312	1.0205				2.15026	1.50522
209			1.57445	1.14819				1.15745	1.58844
210			1.46501	0.682228				0.468461	1.40053
211			1.08628	1.31244				1.50503	1.01632
212			1.09064	0.556938				1.1221	0.856239
213			1.54628	0.779065				1.7948	1.45043
214			1.201	0.944593				4.75704	2.45287
215			2.02565	0.833127				1.23731	0.737509
216			1.78215	1.47872				0.738694	0.981441
217			1.30483	10.4646				1.59096	0.917946
218			3.02166	0.541591				0.511134	1.02823
219			2.28323	1.45703				1.59647	1.24669
220			1.51856	5.17676				1.27788	2.20082
221			2.20686	1.91625				0.900811	0.913966
222			1.19189	3.41767				0.714286	1.42623
223			1.56279	1.24585				1.3276	1.20685
224			1.97863	1.10563				2.04511	1.80772
225			0.950937	7.0141				2.40046	3.0286
226			1.0755	2.23161				2.36681	1.34431
227			0.606738	1.47777				2.2759	1.76719
228			2.41317	1.02015				1.12245	1.18426
229			1.29058	0.581252				0.85529	0.814491
230			1.44018	1.99281				2.07566	0.739202
231			2.6261	2.8074				1.42792	1.65651
232			1.54184	2.82609				1.35831	0.889477
233			1.31673	0.973196				1.17378	2.91133
234			1.05357	1.90669				0.883416	1.08047
235			1.04189	4.23411				1.21622	0.797117
236			1.13964	0.594863				0.833211	0.839058
237			1.38668	1.68294				0.979908	0.854062
238			4.91143	8.75835				0.740033	1.41407
239			2.89991	1.01476				0.745254	1.82724
240			0.83397	0.553049				0.977061	2.44853
241			0.816552	0.422918				0.450079	1.66255
242			0.964803	1.26716				4.98478	1.90049
243			2.51979	0.716524				4.07395	1.52778
244			1.48016	0.996328				1.04409	1.35306
245			1.88466	0.995384				2.79154	2.30931
246			2.53926	0.672464				1.08585	0.840655
247			1.03139	1.24749				0.84688	1.17071
248			1.34644	0.811876				1.41517	1.27816
249			1.4707	0.660041				5.28205	1.422
250			1.3845	3.57903				2.74777	1.13997
251			1.21551	0.744141				5.77171	1.49726
252			1.56176	0.611369				1.03785	2.15134
253			1.74348	1.91512				1.35838	1.36401
254			2.19796	2.10285				1.15863	1.58246
255			1.11525	0.506554				2.59668	0.816997
256			1.11405	0.505349				0.788652	1.04689
257			0.897131	0.757507				0.621082	1.06701
258			0.715014	1.83942				0.727357	1.05037
259			1.05385	4.32719				0.402982	1.64342
260			0.735046	1.2716				1.88081	1.40911
261			0.709308	1.02224				1.79223	2.0966
262			1.8581	0.54733				1.44043	1.54805
263			0.952026	2.59848				2.07887	1.23419
264			1.92307	2.46667				0.567686	0.806778
265			1.40227	4.40616				0.692169	1.11605
266			1.02151	4.40794				0.434271	3.17138
267			1.82914	1.7997				0.811925	1.31215
268			2.34962	1.41555				1.03128	0.595876
269			4.27661	1.2542				1.69354	1.50417
270			3.39011	0.703117				1.23471	1.01329
271			2.91107	2.31794				1.29814	1.871
272			2.33626	0.860181				0.720832	1.15407
273			2.03414	1.9858				1.5163	1.11158
274			1.59598	0.81994				0.781133	0.612412
275			2.31337	0.450461				1.66217	1.1288
276			1.40955	1.97731				1.7344	0.985525
277			1.2065	1.40623				1.28274	1.42539
278			1.12796	2.22375				0.465414	1.54093
279			0.907237	0.729024				0.552306	1.0776
280			1.61426	1.09253				3.18437	0.885841
281			1.12427	1.1092				0.667566	0.687688
282			1.63259	0.470994				1.94537	1.54427
283			1.70034	4.09403				1.38749	1.46112
284			6.00287	2.7627				2.05803	0.920019
285			6.12316	1.22375				0.797555	2.43329
286			2.74878	1.93891				1.43258	1.22084
287			8.35371	0.417865				2.31311	0.597991
288			1.30286	0.753807				0.332383	0.716392
289			1.74658	0.624473				2.90151	0.715359
290			1.1385	1.7695				1.59419	0.931781
291			1.40372	0.708159				0.76374	0.63151
292			1.49413	0.716814				1.13897	0.693053
293			2.16038	0.406172				1.35714	1.07841
294			3.01905	0.799079				1.81602	1.34692
295			0.671971	3.85858				1.31663
296			4.31812	0.559035				0.690304
297			0.581692	1.58376				1.29116
298			1.23652	0.411783				2.14818
299			1.30682	0.661101				3.13554
300			0.573248	1.42206				1.72698
301			0.508255	1.64928				0.862985
302			0.488214	2.07418				1.04725
303			0.779742	1.29224				2.447
304			1.77629	0.254351				0.637782
305			0.973558	0.410047				1.8238
306			1.10095	0.89116				2.18144
307			0.726766	0.803997				0.785296
308			0.678212	1.26196				0.51139
309			3.02123	0.983506				0.679314
310			1.62001	1.50807				0.388123
311			2.49171	0.326825				0.555968
312			0.827057	3.11961				1.78336
313			2.32041	1.57662				1.99338
314			0.765512	1.00371				0.578235
315			1.86524	0.929859				0.677166
316			1.74556	1.3528				1.29094
317			4.62069	3.01502				2.13758
318			0.750128	2.18038				0.670857
319			1.98677	1.2626				0.765861
320			0.887678	1.82207				1.51906
321			0.906902	1.50834				0.434747
322			0.648098	1.68057				0.995312
323			1.19268	6.74249				3.4107
324			2.24685	3.53325				0.815487
325			1.36984	0.543745				0.771819
326			1.43466	0.680283				0.620261
327			0.658009	0.743444				0.934256
328			0.43234	1.10481				0.889613
329			2.21663	0.767698				3.67386
330			1.02299	1.31685				1.02569
331			1.12859	1.49805				0.669385
332			1.77962	0.939084				1.19644
333			0.910636	0.629112				1.99082
334			1.52155	1.84524				0.67897
335			0.859456	0.992608				0.900687
336			2.01844	1.05777				0.386057
337			0.868283	0.43476				1.81422
338			2.34283	0.339273				0.540441
339			0.243216	1.07766				2.43071
340			2.54787	0.46416				0.987627
341			0.708822	0.362799				0.855624
342			0.775295	0.472986				1.20816
343			4.16711	0.419212				0.997663
344			4.22185	1.18697				2.23143
345			2.71748	2.865
346			2.93838	0.439655
347			4.4942	0.950388
348			2.05126	0.519235
349			1.10513	0.451542
350			1.33058	0.70535
351			0.533822	1.17345
352			1.17887	0.724577
353			0.750273	0.70104
354			1.01566	0.326957
355			1.26336	0.635918
356			1.65613	0.870049
357			1.04563	2.87767
358			1.5413	1.61219
359			0.90579	0.306699
360			1.99021	0.611783
361			1.17118	0.439025
362			2.92702	0.327165
363			0.512871	0.475739
364			0.471632	0.553368
365			0.453214	1.32391
366			1.69289	0.283627
367			0.561381	1.24382
368			0.595103	1.60999
369			0.977976	0.339948
370			1.20474	0.640083
371			3.33402	0.826124
372			0.623923	1.74406
373			1.4379	0.455932
374			5.87696	0.584204
375			0.952604	0.906186
376			0.491949	1.98745
377			1.20568	0.757544
378			1.35933	1.54604
379			0.376845	0.689458
380			0.623286	1.41906
381			0.42692	1.05866
382			0.872203	0.380106
383			0.553446	0.313406
384			0.914189	0.456244
385			0.734431	1.08782
386			0.620448	0.701787
387			0.709498	0.662582
388			1.81406	0.669546
389			0.696045	0.351332
390			0.800768	0.576303
391			1.38994	0.420005
392			0.789753	0.949174
393			0.55256
394			0.699436
395			0.498187
396			0.371887
397			0.503791
398			1.01493
399			0.867179
400			0.596258
401			0.878091
402			0.398903
403			1.64173
404			1.26809
405			0.534445
406			1.64234
407			0.454968
408			0.452997
409			0.363707
410			0.377437
411			0.360233
412			2.25219
413			0.667
414			1.04564
415			1.57441
416			1.25998
417			0.627999
418			1.38356
419			0.419243

## Sheet: Figure 2G-Signal Area
	Layer I					Layer II/III
	Somata		Processes			Somata		Processes
	Acute	Chronic	Acute	Chronic		Acute	Chronic	Acute	Chronic
1	2.54737	2.53472	21.1897	3.65888		2.19051	1.28889	9.57366	26.4587
2	8.36172	15.0519	16.6559	5.28295		6.15213	2.72376	1.51392	2.69977
3	8.43043	0.929275	3.04527	3.92007		23.2904	1.25606	3.52733	2.58177
4	3.19688	6.05145	43.9122	11.5177		1.94713	10.0815	9.08657	4.85849
5	0	1.35504	3.89117	8.83032		3.20355	3.2554	8.41822	3.88626
6	1.79752	0.70869	2.32466	12.3352		3.35033	30.7868	4.97851	19.5287
7	15.3556	7.57392	8.30404	7.93714		10.8157	12.2171	4.47686	2.84658
8	6.37627	5.99408	19.2326	10.8694		0	2.18527	2.0913	10.615
9	11.5837	3.94445	28.1984	6.94066		1.78409	5.04974	8.42563	2.87141
10	8.56141	4.45064	4.06266	1.82235		28.4687	3.5905	4.37426	0
11	18.7693	1.91563	33.6147	4.74051		51.1293	2.1454	2.09901	8.18676
12	13.9539	5.08727	6.13734	20.5878		2.50531	13.2866	6.37218	2.41138
13	12.0116	8.28417	2.35528	1.4892		8.9067	6.62915	6.53156	5.68654
14	2.72718	30.9531	2.99408	6.10043		16.4965	0.71627	44.7083	0.955044
15	0	26.4529	43.3412	1.86219		2.33081	1.80698	12.8989	8.68842
16	0.813483	0.389085	11.2419	2.65847		0	3.71653	3.42162	1.52414
17	1.16547	8.91288	63.3453	6.829		1.14473	1.09785	0.578401	2.51958
18	12.4151	15.0529	55.9923	10.4999		2.42337	1.20465	0	0.46468
19	8.61653	1.21998	30.6335	2.88887		10.8428	4.63294	2.7871	5.87641
20	1.73641	13.6997	15.1916	5.99301		0.474878	0	0.988411	1.51741
21	2.98419	0	45.1063	0.730607		0.594325	5.96948	34.5754	1.44034
22	25.906	1.6966	1.89189	9.88046		5.12869	1.32081	1.004	3.16221
23	5.4126	2.18234	3.54885	6.35183		1.89919	11.515	13.8368	3.80889
24	3.58688	0.365769	2.0403	3.44314		9.38772	5.57164	2.84999	1.12846
25	0	6.42541	0.867925	3.16015		5.08659	6.60377	0	2.83102
26	0	0	0.357296	3.99651		43.3045	1.30676	7.74025	12.5676
27	4.51927	1.29108	22.436	2.97805		10.2056	2.19481	40.8359	2.58575
28	17.0121	2.54486	10.9456	9.71968		35.9873	0.464753	0	8.94357
29	2.25382	0.561734	14.0496	2.86458		1.10115	6.30427	11.6238	3.56901
30	4.58237	21.2049	12.0203	2.46745		0	7.82501	3.07689	20.1492
31	12.2892	1.4936	14.4983	0.692007		1.42559	0.582497	4.49337	8.18654
32	1.74392	1.03285	14.9325	7.216		1.3925	1.72339	3.79383	9.65463
33	0	2.17634	15.5799	3.48703		9.0713	1.34544	4.62961	19.3533
34	1.84638	11.3354	8.32112	4.38934		12.3178	0.604006	3.53916	13.4992
35	3.36062	3.89627	3.28624	0.628633		13.2728	8.29418	7.53687	4.30744
36	2.91858	16.8915	16.6777	2.23038		9.29386	11.5568	12.1071	1.78408
37	1.8695	6.28709	7.0347	2.56651		17.086	0	2.14804	1.80668
38	1.63935	4.70524	0.471888	3.70358		26.8427	10.6576	0.56541	7.03101
39	0.633495	12.9966	100.965	13.3634		0	9.61185	4.14365	7.84728
40	6.69481	0	20.344	12.2269		1.09786	9.69663	2.1482	1.66864
41	8.47041	26.4707	49.4246	15.0662		0	7.50496	5.12365	11.0213
42	8.04618	16.8575	37.1143	8.54537		2.02656	19.9093	3.7274	1.09478
43	0.537218	3.52309	19.1198	1.67228		4.41835	0.529204	6.48842	4.28736
44	0.517544	28.3037	2.84362	0.664934		2.79807	31.902	11.1091	2.62299
45	3.49486	6.50683	54.4739	2.32646		2.58343	0	7.32851	2.52846
46	0.963421	2.23497	54.1918	5.56615		7.11654	4.89745	2.97877	3.50787
47	0.517205	4.40713	24.7155	1.94721		6.71058	6.56905	3.93236	4.63318
48	1.90842	4.1913	9.06487	1.89877		2.22579	30.9255	2.70012	4.42441
49	0.963795	14.9097	7.5323	2.4455		4.29124	0	2.6883	8.73341
50	1.25688	0	13.924	3.00957		0.346732	1.49808	3.28761	2.56214
51	1.40775	23.504	8.0015	8.32356		3.35824	7.1696	11.0389	21.4395
52	2.2147	1.82616	3.85264	5.10185		0	2.75246	6.90226	4.78662
53	6.23889	7.74278	0.84746	2.85138		0.746027	20.8731	13.5463	3.49261
54	1.66946	17.5395	0.519672	1.73378		13.1411	11.8964	5.04019	1.9222
55	31.0554	1.36642	1.65256	2.0481		2.62125	2.66206	5.86165	4.62246
56	3.37876	27.5155	0.799316	6.67329		3.60208	0.690222	3.80365	0.811993
57	1.20701	12.4061	1.18195	41.7883		2.94252	49.5704	2.65793	5.95392
58	0.313703	4.70435	4.89198	54.6097			32.1853	10.975	0
59	25.4168	15.5211	3.43965	10.1234			17.6368	30.6366	8.32963
60	3.9694	8.36582	3.97801	2.18355			1.52667	101.251	0.565725
61	0	2.30759	10.0603	7.94053			17.442	1.96934	5.24366
62	26.6698	2.91886	16.4421	1.72804			0	18.4859	3.79399
63	1.27007	12.04	33.7628	2.69683			4.47098	17.8061	3.13461
64	4.05923	1.35464	20.5287	3.48075			0.630815	0.542185	7.22599
65	22.5561	1.05906	2.66261	10.9857			0.434028	6.14245	6.11104
66	16.1376	1.34424	9.0596	3.5474			3.13526	0.399629	2.68926
67	17.5199	2.40273	3.61806	3.2199			0	11.2424	2.59697
68	20.0867	1.56979	1.43282	1.88975				5.66539	2.67303
69	31.456	0.565852	20.5469	0				7.61282	2.20003
70	28.4931	6.13746	1.75279	1.70395				0	0.797282
71	27.2494	0	0.540598	2.67398				4.47578	4.0285
72	3.42648	0.434062	1.16697	0.706552				3.62047	3.60365
73	3.29487	7.31092	22.4187	0.463487				10.4854	4.93511
74	12.0182	0.69145	6.23969	1.25583				0.790641	12.2449
75	3.64642	0	0.559476	1.06632				8.37658	2.43333
76	1.08345	1.34646	30.7111	6.31931				2.54356	2.4472
77	2.85577	2.44786	23.5796	1.15892				3.86423	21.4053
78	7.50078	9.95839	17.7174	11.2516				17.2835	11.7305
79	28.3123	4.71242	5.4126	4.77682				9.41391	16.1447
80	7.9495	12.3812	6.81925	2.72282				12.167	6.47005
81	18.9345		8.27152	2.04886				12.8297	1.1992
82	5.04266		2.54915	4.7322				4.27351	5.18252
83	56.6317		4.72274	0.866848				3.26438	2.79583
84	10.3959		5.22936	4.03353				6.04671	1.96665
85	1.62435		10.9779	6.6063				2.84696	5.03265
86	1.18712		12.1287	1.92216				2.37895	5.5622
87	1.35499		44.4819	8.57643				4.66101	20.7231
88	1.22252		8.95653	1.67988				39.4388	1.3579
89	0.409076		9.44703	3.49725				6.45061	3.21871
90	0.676461		19.2436	0.586942				8.70227	5.2044
91	0.582483		0.745532	1.35965				1.9138	11.9809
92	0.904746		8.1238	0.894365				9.7309	6.57635
93	0.685473		0.351181	1.09512				1.47728	4.04689
94	0.775134		1.0251	0.946838				26.1081	1.28702
95	0.865055		7.44645	21.8663				11.3419	2.31293
96			19.0319	0.770361				10.5302	4.44899
97			14.4067	1.50189				5.06031	15.3342
98			9.15824	4.63127				0.360931	0
99			12.2908	0				3.76066	1.80022
100			28.963	2.36441				1.55211	3.71599
101			3.69483	8.42739				1.7029	5.14309
102			0.493263	0.904401				0.93881	4.56541
103			5.44621	2.70026				0.579744	2.54796
104			28.7473	7.29762				3.4962	2.37359
105			1.65308	0				5.09112	1.72285
106			6.7299	6.40439				9.71661	10.856
107			13.284	1.49126				9.44059	9.41114
108			22.695	4.55405				19.1209	13.3358
109			10.4975	10.6688				7.53827	3.52577
110			8.83151	1.34521				21.4289	22.0681
111			1.22114	0				2.6832	5.33566
112			1.26692	0.454886				8.16406	4.41193
113			2.08826	3.34486				0.399631	6.57956
114			3.62771	25.5983				2.56181	3.37653
115			2.71931	3.13932				2.29608	5.6721
116			10.8636	16.0522				2.04379	3.84746
117			3.87047	1.52869				0.786884	3.4245
118			2.41948	1.10754				2.64719	8.6531
119			2.93444	3.12265				9.8483	5.27615
120			3.66179	10.6421				23.9837	5.89187
121			2.08765	14.9828				5.2805	4.07065
122			0	18.7345				3.73398	6.65708
123			1.58246	3.66719				22.454	6.1935
124			0.4744	4.57335				1.29338	1.68577
125			4.91816	0				2.15556	3.63418
126			1.46669	1.86629				7.08653	3.47297
127			7.4305	6.16141				13.8225	17.4621
128			0.989282	6.45887				1.75991	40.0736
129			1.42365	0.807608				0.57707	4.73374
130			1.71156	0.852117				1.7326	12.6662
131			7.8947	0.788538				3.346	2.12696
132			1.20354	0.551461				3.90546	2.33629
133			1.22826	5.5038				2.17826	1.20491
134			0.512958	1.56327				4.44255	2.08159
135			0.743802	1.95746				1.1806	2.77313
136			0	3.05028				10.4773	6.02221
137			2.69744	113.423				1.68608	25.6597
138			0	5.11622				3.70668	2.5795
139			0.877918	2.90603				4.03438	4.0876
140			0.876835	5.65868				36.4859	11.5049
141			2.87594	0.929078				20.2487	1.40864
142			30.277	1.1724				27.8589	44.4766
143			1.40059	2.67759				90.591	6.33212
144			0.906228	1.83086				15.5131	1.66317
145			33.5002	3.02945				25.6103	0
146			0.428049	11.7701				41.4568	8.42626
147			6.89759	3.67841				7.8279	1.20082
148			1.6979	0.499702				9.59352	8.34464
149			1.57925	4.43424				1.73252	6.06324
150			19.2208	3.60516				3.14403	14.3704
151			1.15475	3.07956				1.84822	3.66191
152			0.664763	2.56842				0	2.76033
153			0.968377	3.44963				2.01139	14.2271
154			9.21459	4.46387				2.30824	5.98461
155			15.7196	2.21626				4.54161	1.41274
156			0	3.30698				12.4786	0.758372
157			2.39343	1.60505				6.31352	2.48844
158			34.3675	2.83771				7.73659	6.15346
159			2.009	6.3663				2.56849	3.27778
160			6.37414	1.689				7.63692	6.36913
161			1.60656	4.72347				2.24424	6.48435
162			2.47497	4.46021				1.6667	5.64402
163			3.09858	2.92435				1.93911	9.38385
164			3.18138	1.98154				0.876378	1.38516
165			19.4959	7.16461				0.87457	6.58312
166			5.76563	0.59729				2.24737	3.93595
167			8.27433	4.79404				3.47236	2.98476
168			1.56163	1.41627				8.19283	3.15419
169			5.33319	4.06546				9.02794	3.36286
170			3.64659	4.78627				0.548045	2.92687
171			1.45881	17.9986				3.59263	8.67847
172			3.24359	1.12156				2.94302	1.01737
173			3.0076	6.87734				18.1285	8.82028
174			11.6751	19.1268				12.535	0
175			1.20415	2.08795				7.38374	1.96454
176			14.905	2.54981				6.46256	3.33923
177			30.9817	2.78385				5.21004	4.31156
178			0.841548	5.05849				3.25932	7.83123
179			6.27326	3.6408				2.92056	2.69705
180			12.12	4.01523				5.42976	3.84124
181			4.82981	9.58812				8.60371	0
182			5.69943	2.78648				14.4013	6.13181
183			6.26532	4.84816				8.34581	4.34151
184			1.06598	2.95839				9.15438	3.88887
185			3.16203	4.18404				6.89521	0.36307
186			45.7458	3.25723				6.34898	2.98515
187			18.0507	3.30903				4.16562	5.98362
188			3.12494	8.18466				3.03871	5.26233
189			5.08465	0.642606				0.75253	3.16998
190			4.21054	2.46147				2.01862	1.14692
191			2.10384	0.875098				32.0688	11.6494
192			3.07666	40.3806				39.0291	1.08648
193			12.0154	11.5526				14.4101	6.4746
194			5.85097	13.7642				18.2386	3.66038
195			3.93738	7.17385				10.768	2.67462
196			7.63359	8.32194				4.72033	5.81283
197			5.78349	5.48711				17.3284	1.85926
198			37.1527	9.36082				5.09849	10.4961
199			17.2684	1.47096				4.23023	2.90716
200			58.6246	6.30565				16.143	1.32547
201			3.2404	3.41769				1.16971	0.913859
202			44.4823	7.78924				1.60238	0.690374
203			95.2402	0.904468				7.04818	3.35637
204			2.73647	7.71996				14.6315	5.30025
205			7.30824	4.96944				0.97904	0
206			12.7775	1.45246				0.582763	27.4929
207			17.6954	16.8675				2.83941	7.39602
208			6.59695	5.51171				16.5443	6.93133
209			10.4321	6.27207				4.73996	2.99797
210			11.7428	2.60145				3.76685	4.76793
211			6.09323	5.01009				4.28557	1.01632
212			4.78391	0.556938				4.27111	3.28598
213			18.2214	2.84322				6.2869	5.59404
214			4.53035	1.54636				34.0525	22.662
215			7.53581	5.12938				3.49849	1.46286
216			13.5837	0				3.3462	4.9142
217			6.70062	106.173				4.37089	1.71828
218			12.2707	1.06168				1.40362	1.02823
219			21.2197	8.10793				10.1485	4.51691
220			10.1396	57.0748				6.65404	6.53935
221			17.4746	10.0511				2.17849	2.58149
222			5.8283	23.0683				2.01092	5.18098
223			8.52149	4.71288				5.86843	7.06826
224			12.7546	4.16955				12.9866	11.5908
225			1.79004	58.1029				17.1953	19.151
226			5.76612	17.8625				9.87284	4.79426
227			1.21094	5.69581				9.26279	13.3968
228			63.3386	6.32159				3.64563	7.68691
229			14.1141	2.79758				5.16233	4.44269
230			5.44449	4.98974				12.0392	2.86268
231			18.6159	26.2056				9.97247	7.77795
232			12.8541	11.2861				7.13863	3.81399
233			11.0669	5.23869				7.1966	18.8807
234			7.40792	7.65955				3.21299	2.09698
235			3.05079	38.3187				5.81903	0.797117
236			2.27901	0.594863				1.63956	1.58288
237			5.92317	10.6211				4.4622	2.40166
238			35.6632	80.6132				4.03805	6.3645
239			7.14588	4.84044				2.02736	9.22837
240			4.17153	2.0653				2.78338	18.1619
241			2.07742	0.826791				1.68767	4.6822
242			2.53582	7.3957				74.9519	6.56404
243			8.4493	1.38527				51.0145	5.86367
244			6.40165	3.69591				3.88796	6.16646
245			21.8645	7.9515				23.3172	6.04449
246			17.5455	2.51509				2.99836	3.16985
247			11.9084	8.00782				3.19018	4.68211
248			10.9187	0.811876				9.86956	3.49354
249			13.9909	1.19206				19.7194	5.24138
250			9.32053	16.561				16.7522	1.13997
251			9.34723	6.54029				26.3476	5.77462
252			9.88608	1.20521				4.31079	9.31429
253			8.14651	6.20623				6.01347	3.65016
254			11.664	39.0811				6.51835	5.5996
255			3.64696	1.66141				9.07014	3.16495
256			5.85966	0.505349				2.94034	3.7514
257			1.73339	3.52059				4.12263	3.94403
258			0.715014	3.3514				0.727357	3.96626
259			6.49726	38.021				1.19212	8.69008
260			2.11529	3.50883				7.91401	6.18341
261			4.04676	5.63854				6.53161	8.18421
262			12.4954	2.06096				6.91297	6.51442
263			13.782	15.1454				15.4799	2.41229
264			19.1535	11.3875				0.567686	2.9916
265			19.5208	33.7617				2.01089	1.99232
266			13.2991	19.6539				0.434271	52.5507
267			14.633	8.86766				0.811925	4.75696
268			32.8489	6.49968				0	0.595876
269			59.751	4.48532				1.69354	9.9106
270			57.5709	1.39734				3.38992	3.76096
271			67.3349	14.1376				2.41352	3.72254
272			33.7305	8.30176				2.76963	6.44386
273			22.4717	8.95276				7.94238	5.12745
274			27.2417	2.67257				1.47179	0.612412
275			41.1222	0.450461				9.81282	6.92997
276			10.5676	6.84998				9.41676	4.3524
277			6.68393	8.53355				6.8614	7.32761
278			11.2954	7.7882				0.885823	15.7772
279			1.61011	4.50654				0	3.46612
280			9.93561	7.54025				22.9478	3.45287
281			8.94893	5.85302				2.26932	0.687688
282			8.58404	0				12.3865	3.92457
283			6.04144	33.6782				8.09113	8.73502
284			34.7934	21.575				13.2538	5.66678
285			30.8295	2.34245				3.00707	5.99449
286			41.0826	7.36423				6.81591	6.52037
287			33.4064	1.15018				14.5938	1.74324
288			2.60354	4.49979				0.92041	0.716392
289			14.7475	2.47309				18.6806	2.54221
290			4.21491	9.65811				10.0585	3.29154
291			8.05738	1.33737				3.65338	0.63151
292			5.51584	2.70622				8.07283	1.37152
293			13.994	0.89459				9.08879	4.2156
294			21.2213	1.55786				3.31229	8.47098
295			3.70892	22.4521				5.97774
296			19.3692	3.98597				1.21674
297			0.581692	4.36611				12.9528
298			6.72594	2.6716				15.5481
299			9.01669	1.92888				44.6529
300			1.45158	4.07944				7.95615
301			0.508255	7.37893				2.40119
302			1.56307	15.4687				5.85979
303			1.55516	5.20899				13.8016
304			9.977	0.727013				0.637782
305			7.80573	0.410047				7.6861
306			5.8455	4.20015				28.2628
307			4.92531	2.22343				1.48596
308			3.67593	2.4491				0.51139
309			44.96	1.9426				2.65656
310			30.465	5.63361				2.17597
311			34.7084	0.626184				1.61153
312			4.29856	27.7537				4.61511
313			12.1163	9.15039				12.4164
314			2.20893	5.83208				1.10213
315			18.5212	2.67189				1.9821
316			20.9015	8.5767				7.48988
317			71.2775	15.3938				8.86901
318			3.32927	26.329				1.87581
319			11.9203	6.69949				2.88
320			1.6817	6.40791				4.11437
321			4.07294	4.22125				0.848209
322			2.93796	9.31924				8.04466
323			3.19375	54.5008				36.7274
324			7.65041	25.4073				4.5944
325			8.24067	0.543745				3.60404
326			9.2837	2.3133				0.620261
327			5.62624	2.77004				1.80605
328			1.62108	2.82636				4.82958
329			23.2645	1.50961				38.8141
330			7.46011	5.04547				3.82304
331			13.4514	3.9833				1.96838
332			18.7118	3.5764				4.37165
333			6.20365	1.24913				39.1179
334			8.85178	8.02083				1.28488
335			4.16406	0.992608				2.3119
336			13.5314	2.04505				0.386057
337			5.86126	1.24845				6.80256
338			9.61095	0.664893				0
339			0.243216	4.52248				14.3829
340			40.6029	0				5.94631
341			7.34484	0.715796				2.46825
342			2.1091	0.8973				3.23943
343			45.8279	1.60019				7.00152
344			84.0156	8.70729				10.267
345			72.057	18.4888
346			27.9099	1.2341
347			45.8218	4.1659
348			19.7285	1.48942
349			14.3599	2.4837
350			11.8451	2.5256
351			1.05057	8.90479
352			2.15686	1.39221
353			2.96364	1.86481
354			5.25663	0.646776
355			7.9001	1.85569
356			12.9449	1.6724
357			3.74395	15.301
358			17.3043	5.27447
359			3.81829	0.306699
360			15.7511	2.66552
361			10.8551	1.21307
362			57.7488	0.327165
363			1.37943	1.66526
364			0	1.44463
365			0.453214	4.71013
366			6.77987	0
367			0	3.50884
368			0.595103	8.46238
369			3.93949	0
370			6.71848	1.86067
371			28.4663	4.34426
372			2.40107	10.7502
373			9.46039	1.71784
374			37.6207	3.05478
375			2.65052	2.94617
376			2.29284	7.43274
377			6.50145	3.95972
378			6.8259	7.87878
379			0.740518	2.39103
380			0.623286	6.43468
381			0.805886	5.39548
382			4.37974	0.734481
383			2.6261	1.15732
384			2.46055	0.870985
385			2.0443	4.17465
386			2.93739	2.02826
387			1.37423	2.50628
388			10.1384	1.76204
389			1.35958	1.01785
390			1.47138	1.10487
391			6.36192	0.827128
392			1.56144	1.84073
393			1.61534
394			2.4249
395			1.3008
396			1.0277
397			2.36637
398			3.28722
399			4.53412
400			2.21012
401			5.71969
402			1.56044
403			7.28523
404			4.54563
405			1.2241
406			10.7319
407			2.06672
408			1.68691
409			0.690448
410			3.29566
411			0.711498
412			7.17474
413			2.21561
414			3.05924
415			5.55852
416			7.74816
417			2.94608
418			1.38356
419			0

## Sheet: Figure 2H-Baseline Stability
	Somata						Processes
Day 1	3.5423	2.64806	8.37092	3.64792	4.21355		4.90953	5.93671	7.66277	5.70204	6.1831
Day 2	3.46049	4.50833	5.95481	2.9191	4.72302		5.04895	5.80583	5.30333	5.51585	7.37821
Day 3	2.40621	1.94318	5.68699	3.60676	5.47984		4.95915	5.13298	8.04311	5.15939	8.08365
	Mouse 1	Mouse 2	Mouse 3	Mouse 4	Mouse 5		Mouse 1	Mouse 2	Mouse 3	Mouse 4	Mouse 5
