# Supplementary material for: Microglial calcium signaling is attuned to neuronal activity in awake mice
Source: eLife. 2020 Jul 27;9:e56502. doi: 10.7554/eLife.56502 (PMC7402678; doi:10.7554/eLife.56502)
Supplement: Figure 3—source data 1. [file elife-56502-fig3-data1.xlsx]

## Sheet: Figure 3G-% Active
	Somata						Processes
	Mouse 1	Mouse 2	Mouse 3	Mouse 4	Mouse 5		Mouse 1	Mouse 2	Mouse 3	Mouse 4	Mouse 5
Baseline	32	36	0	31	13		14	28	32	20	20
0-10	22	18	8	13	7		58	37	35	30	31
10-20	13	33	8	0	7		57	47	52	57	37
20-30	31	6	0	6	17		61	43	40	62	46

## Sheet: Figure 3G-Signal Area
	Somata						Processes
	Mouse 1	Mouse 2	Mouse 3	Mouse 4	Mouse 5		Mouse 1	Mouse 2	Mouse 3	Mouse 4	Mouse 5
Baseline	5.80446	6.5328	1.88485	3.67773	1.61735		3.45269	4.03791	5.04195	3.73095	4.42855
0-10	5.51011	4.1352	2.51525	1.537	2.24977		10.6167	5.95748	5.7869	6.59133	6.17505
10-20	2.08882	4.92908	3.73816	0.883919	1.4544		17.8531	10.7625	9.73453	11.9819	9.66531
20-30	6.60085	1.62589	1.24968	1.08905	3.00048		14.1985	7.67825	9.6268	15.3689	8.3789

## Sheet: Figure 3H-minutebins
	Baseline											Isoflurane
time (min):	1	2	3	4	5	6	7	8	9	10		1	2	3	4	5	6	7	8	9	10	11	12	13	14	15	16	17	18	19	20	21	22	23	24	25	26	27	28	29	30
	0	0	0	11.2736	0	0	0	0	0	0		0	1.08613	0	0	0	0	0	0	0	0	0	0	0	0	0.866523	0	0	0	0	0	0	0	0	0	0	0	0	0.948094	0	0
	0	0	0	0	0	0	0	0	0	0		0	0	0	0	0	0	16.3541	0	0	0	0	0	0	0	0	0	0	0	5.49416	0	1.08495	0	0	0	0	0	0	0	0	0
	1.30324	0	9.47372	0	0	0	0	1.53919	0	0		0	0	0	0	0.291572	0	0	0	1.7533	0	0	0	0	0	0	0	0	1.09147	0	0.810575	1.04068	0.909331	0	0	0	0	0	0	0	0
	0	17.5085	0	11.3979	0	0	0	0	0	0		0	10.2111	0	0	0	0.620834	0	0	0	0	0	0	0	0	3.29184	83.9102	0	0	0	0	0	0	0.889195	0	0	0	0	0	0	0
	0	0	0	0	0	0	0	0	1.29094	0		0	0	0	0	0	0	0	0	0	0	0	0	0	0	0	0	0	0	0.667536	0	0	0	0	1.00821	0	0	0	0	0	0
	0	0	0	2.25526	0	0	0	0	0	0		0	0	0	0	0	0	0	0	5.33969	0	1.91781	0	0	0	4.79787	0	0	0	0	0	0	0.918285	0	0	0	0	0	0	0	0
	0.733882	0	0.966781	0	0	0	0	0	0	0		0	0	0	0	0.814439	0	0	0	0	0	0	0	0	13.5562	0	0	0	0	0	20.5471	0	0	0	0	0	0	0	0	9.83926	0
	0	0	0	0	0	0	0	0	0.927475	0		0	0	0.551875	0	0	0	0	0	0	0	0	0	2.91584	0	14.3445	0	0	0	1.09544	0	0	0	0	0	0	0	1.27778	2.72695	1.23676	0
	1.04592	0	0	0	0	0	0	0	0	0		0.717859	0	0	0	0	0	0	0	0	0	0	0	0	0	0	0	0	0	0	0	0	0	0	0	0	0	0	0.808133	0.993982	0
	0	0	0	0	0	0	0	0	0	0		0	0	0	0	0	0.915069	0.991627	1.01739	0	0	0	0	0	0	0	0	0	0	0	0.654918	0	0	0	0	0	0	0	0	0	0
	0	0.838999	0	0	0	0	0	0	0	0		1.49182	0	0	0	0	0	0	0.725634	0	0	0.612285	0	0	0	0	0	0	0	0	0	0	0	0	0	0	0	1.25107	2.4903	1.0118	0
	0	0	0	0	0	0	0	0	0	0		0	0	0	0	0	0	0	0.545263	0	5.94916	0	2.75596	0	7.62827	0	4.31795	0	3.56747	0	0	0	0	1.66662	4.62061	0	0	0	0	0	0
	0	0	0	0	0	0	0	0	0	0		0	0	11.7987	0	0	0	0	0	0	0	0	0	0	0	0	1.26093	0	0	0	0	0	0	0	0	0	0	0	0	0	0
	0	0	0	0	0	0	0	0	0	0		0	0	0	0	0	0	0.685303	0.380079	0.35022	0	0	0	0	0	0	0.452154	0.379416	0	0	0	0	0	0	0	0	0	0.601399	0	0	0
	0	0	0	0	0	0	0	0	0	0.923834		0	0	0	0	0	0.379507	0	0	0.391288	0	0	0.494418	0.508014	0	0	0	0	0	0	0	0	0	0	0	0	0	0	0	0.798351	0
	0	0	0	0	0	0	0	0	0	0		0.336478	0	0	0	0	0	0	0	0	0	2.89644	7.19393	0	0	0	2.6288	4.07919	0	0	0	0	0	0	0	0	0	22.9313	7.3058	0	0
	0	1.40067	0	0	0	0	0	0	0	0		0	0	0	0	0	0	0	0.926614	0	1.389	28.6566	0	0	0	0	0	0	9.33921	11.2254	2.18165	0	0	0	0	0	0	0	0	8.63893	12.5194
	0	0	0	0	0	0	2.12631	0	2.02012	0		0	0	0	0	0	0	0	0	0	8.94041	0	0	0	0.751326	0	0	0	1.28729	0.661602	0	0	0	16.6767	12.2949	0	0	0	0	0	0
	0	0	0	0	0	0	0	0	0	0.907051		0	0	0	0	20.7726	12.7875	1.42696	0	0	0	0	0	0	0.622015	0	0	0	0	1.29635	0	33.559	28.7381	0	0	0	0	14.439	0	0	0
	0	0	0	0	0	0	0	0	0	0		0	0	0	0	0	0	0	0	5.85158	10.3212	0	23.075	0	0	0	0	0	0	0	0	0	0	0	0	0	0	35.9475	3.85087	0	0
	0	0	0	0	0	0	0	0	0	0		0	0	0.562219	0	0	0	0	0	1.6317	0	0	0	0	0	0	0	0	49.2484	0	0	0	5.72032	0	0	0	0	0	0	3.1999	13.4144
	0	0	0.856699	0	0	0	0	0	0	0		0	0	0	0	0	0	1.71192	0.920654	0	0	0	0	0	0	0	0	0	0	0	70.3968	0	0	2.72779	13.7559	0	0	4.51258	0	0	0
	0	0	0	0	0	0	0	0	0	0		0	0	0	10.415	0	0	0	0	0	0	0	18.1368	0	0	0	0	0	18.9122	0	0	0	0.757255	0	0	0	0	0	0.803132	0	0
	0	0	0	0	0.798488	0	0.935467	0.808651	0	0		4.25996	0	0	0	0	0.862412	0	0	0	0	0	0	0	0	1.62623	2.35372	3.1088	0	0	0	0	0	0	0	0	0	0	0	10.6295	17.3743
	0	2.16181	0	0	1.12667	1.04705	0	0	0	0		0	0	0	0	0	11.7502	0	0	0	0	0	0	0	0	0.475381	0	0	0	0	0	0	0	0	0.891913	0	0	0	3.00319	3.57477	14.189
	0	0.661175	0	0	0	0	0	0	0	0.713775		0	2.41737	0	0	0	15.6536	0.933636	0	0	0	0.716357	0	0	0	0	0	0	0	0	0	0	0.750826	0.71337	0	0	0.694343	0	0	0	0
	0	0	0	0	0	0	0	0	0	0		0	0	0	0	0	0	0	0	2.08601	0	0	0	0	0	0	0	0.774718	0	0	7.6479	0	0	0	0	0	0	0	12.9669	0	0
	0	0	0	0	0	0	0	0	0	0		0.612107	0.282585	0	0	0	0	0	0	0	0	0	0	1.67783	0	0	3.63505	0	5.54207	0	0	1.37626	0	0	0	0	0	0	2.83982	5.71817	0
	0	0	0	0	0	0	0	0	0	1.48277		0	0	0	0	0	0.639932	0.644863	0	0	0	0	0	0	0	14.4428	0	0	12.0788	0	0	0	0	0	0	0	0	0	0	9.56296	16.0147
	0	0	0	0	0	0	0	0	0.628153	0		0.538696	0	0	0	0	0	5.37551	0	0	0	0	0	0	0	0	4.1806	14.7753	0	0	38.328	0	5.61903	0	0	0.521387	0	0	0	0	0
	0	0	0	0	0.987253	0	0	0	0	0.906252		0	0	0	0	0	0	17.5144	2.39865	0	0	0	0	0	0	0	0	0	0	1.50307	0	0	0	0	0	0	0	0	0	1.97386	1.00291
	0	0	0	0	0	1.58814	6.03458	0	0	0		0	0	0	0	1.24461	0	0	0	0	4.63868	0	0.255112	0	0	0	0	0	0	0	0	0	0	0	0	0	0	0	0.791244	1.0492	0
	0	0	0	0	0	0	0	0	0	2.98079		0	0	13.7177	0	0	0	0	0	0	0	0	4.98919	0	0	3.5096	9.71797	10.4439	8.51636	0	0	0	0	0	0	0	0	0	0	0.958381	0
	1.67384	0	0	0	0.7739	0	0	0	0	0		0	0	0	0	0	0	0	0	0	0	0	11.6797	2.01515	0	0	0	0	0	5.17779	0	3.00243	0	0	0	0	0	0	0	0	0
	0	1.51173	0	0	0	0	0	0	0.648465	0		0	12.4261	0	0	0	0	0	3.69083	0	0	0	8.87194	0	9.63687	0	3.39205	0	0	0	0	0	0	0	0	0	0	0	1.07914	0	0
	0	0	0	0	0.788596	0	0	0	0.802747	0		0	0	10.2989	7.5786	0	0	0	1.57404	0	0	0	14.2133	7.54705	0	1.41823	3.00344	3.96357	0	0	0	0	2.20476	6.20595	0	15.9517	0	0	0	2.03391	0
	0	0	0	0	0	0	0	0	0	0		0	0	0	0	0	0	0	5.05335	3.11409	0	0	0.508369	0	0	0	0	0	0	0	0	0	0	0.723115	0	0	0.807251	0	0	0.796131	0
	0	0	0	0	0	3.82796	0	0	0	0		0	0	0	0	0	0	0.303286	0	0	0	0	0	0	0	0	0	0	1.23707	1.12109	0	0	0	1.80113	0	0	5.83835	0	8.00769	0	5.1307
	0	0	0	0.857002	0	0	0	0	0	0		0	0	0	0	0	0	0	0	0	0	0	0	0	0	0	0	0	2.46602	39.0682	0	0	0	0	0	0	0	0	0	3.34533	15.9107
	0	0	0	1.60679	2.53401	0	0	0	0	1.30662		0	0	0	0	0	0	3.39982	0	2.36057	0	2.51124	0	0.86257	0	0	0	0	0	2.47447	1.60769	0	11.3209	0	2.32398	0	0	0	0	0	0
	0	0	0	0	0	3.51345	0	0	0	0		0	0	0	0	0	0	7.38044	2.5933	0	0	0	0	0	0.907854	0	0	0	0	1.03879	0	0	0	3.01983	7.71663	0	0	0	4.93833	0	0
	0	0	0	0	1.03255	0	0	1.10144	1.10479	0		8.44866	0	0	0	0	0	0	0	0	2.5177	0	0	0	0	0	0	0	0	0	0	0	0	0	1.84224	0	0	1.78713	0	0	0.552204
	0	0	0	0	1.10105	0	0	0	0	0		0	0.526667	0	0.542445	0	0	0	0	0.942008	0	0	0	0	0	0	2.28204	0	0	0	10.9284	0	0	1.65196	0	0	0	0	0	0	3.66491
	4.10525	0	0	0	0	0	0	0	0	0		0	0	0	6.13634	0.661963	0	0	0	0	0	7.65226	0	5.58084	1.96584	11.9539	0	0	0	0	0	0	1.17825	0	0	0	0	1.17389	0	0	0
	0	0	0	0	0	4.54809	0	0	0	0		1.53207	0	0	0	0.508263	0.558053	0	0.682987	0	0	0	0	0	0	7.89615	69.484	0	0	0	0	0	0	1.30633	0	0	0	5.24592	0	0	1.18766
	0	0	0	0	0	0	0	0	4.48932	0		0	0	0	0	3.51504	0	0	0	0	3.17413	0	0	0	0	0	0	0	0	0	5.28497	1.52925	3.3586	0	0	5.73773	11.7849	0	0	0	0
	1.28666	0	0	0	0	0	0	0	2.21927	0		0	0	0	0	0	0	0	0	0	0	0	0	0	0	0	1.14867	0	0	0.609129	4.08085	0	0	0	0	4.21159	61.7221	28.4418	0	0	0
	0	0	0	0	0	0	11.0751	0	0	0		9.31659	0	0	0	0	0	8.06872	0	0	0	0	0	2.62119	5.02875	0	0	2.5657	0	0	26.8403	42.4035	13.7142	0	0	0	0	0	0	0	0
	0	0	0	0	0	0	0	0	1.18376	1.02188		0	0	0	0	0	0	0	0	7.915	18.094	0	0	0	0	0	6.20955	19.646	3.18228	0	0	0	0	0	25.007	0	0	0	0	0	0
	2.52757	0	0	0	0	0	0	0	0	0		0	0	0	9.87618	19.4283	0	0	0	0	0	0	0	0	0	0	0	0	17.15	17.4611	8.79429	0	0	0	0	46.1734	0	0	0	0	0
	0	0	0	0	0	0.85916	0	0	0	2.23391		0	0	0	23.3477	1.33184	0	0	0	0	0	0	0	0	0	0	0	0	0	0	0	0	0	0	0	0	0	0	0	0	0
	0	0	0.684994	0	0	0	0	0	0	0		0	0	0	0	0	0	4.21834	1.48536	0	0	0	0	0	0	0	0	0	0	12.856	2.02196	0	6.53817	1.29442	0	0	0	0	2.51896	0	0
	0	0	0	0	0.66405	0	0	0	0	0		0.819137	1.1434	0	0	0	0	0	0	0	0.902277	0	0	0	0	0	15.142	2.37091	0	19.0591	4.47604	0	0	0	0	0	0	0	0.547212	0	0
	0	2.07083	0	0	0	0	0	0	1.08813	0		0	0	48.4079	0	0	0	0	0	0	0	0	0	0	0	0	0	0	0	0	0	0	0	7.16429	0	0	0	0	0	0	0
	0	0	0	0	0	0	0	0	0	0		0	0	0	1.52879	0	0	11.9229	0	0	0	0	0	0	0	0	0	5.48255	0	1.58018	0	2.20847	1.0952	0	0	0	0	0	0	0	0
	0.820253	0	0	0	0	0	0	0	0	1.82265		0	0	4.63013	0.829762	0	0	0	0	0	0	0	0	3.22377	0	0	0	0	0	0.657822	0	0	0	1.57979	0	4.35792	0	0	0	3.36338	0
	0	0	0	0	0	0	0.622439	0	0	0		0	0	2.07733	0	0	2.95312	0	0	0	0	0	0	0	8.73074	0	0	1.59268	0.482461	0	0	1.23767	0	0	0	0	0	0	0	1.02243	0
	0.852154	0	0	0	0	0.982149	0	0	0	0.909112		0	0	0	0	0	0	0	0	0	0	0	0.792909	0	0	0	0	0	0	0	0	0	8.49702	0	0	0	0	0	0	0	0
	0	0	0	0	0	0	0	0	2.65029	0		0	0	0.855645	2.43578	0	0	0	0	0.862711	0	0	0	2.28996	1.08598	0	0	0	0	0	0	0	0	1.65486	0	0	5.60356	0	0	0	1.08245
	0	0	0	0	0	0	0	0	0	0.647202		2.78886	0	0	0	3.07157	0	0	1.8733	0	0	0	0	5.23575	0	0	0	2.52304	2.29234	0	0	0	0	0	0	0	0	20.236	0	0	0
	0	0	0	0	0	0	0	0	0	5.01911		0	0	0	10.0867	0	0	0	78.6556	0	0	0	0	1.37901	0	0	0	0	0	0	0	0	0	5.44612	1.09168	0	0	2.11527	3.28265	3.8541	0
	0	0	0	0	0	0	0	0	0	0		0	0	0	12.6908	13.1535	0	0	0	0	0	0	0	0.817168	0.897947	0	0.827368	0.771985	0	0	0	0	0	0	0	7.96169	0	0	0	0	0
	0	0.565983	0	0	0	0	0	0	0	0		0	0	0	0	1.79621	0	0	0	0	0	0	0	0	1.86447	0	0	0	0	0	0	0	0	0	0	0	0	0	21.5895	13.1371	0
	0	0	0	0	0	0	0	0	0	0.310619		31.3797	0	13.0294	0	0	0	0	0	0	0	0	0	0	0	0	0.791297	0.386661	0	0	0	0	0	23.7614	4.47494	0	0	0	0	2.08329	4.21844
	0	0	0	0	0	0	0	0	0	5.5783		27.6472	0	6.63727	2.14542	0	0	0	0	0	0	0	0	0	0	0	0	1.59632	0	0	0	0	0	0	0	0	0	22.2286	0	0	0
	0	0	19.0751	0	0	0	0	0	0	0		0	0	0.679268	0	0	0	5.80094	5.60274	0	2.38717	0	0	1.00453	5.94343	0	0	0	0	0	0	0	0	0	0	0	0	0	0	0.922081	0
	0.965075	0	0	0	0	0	0	0	0	0		0	0	10.0076	1.56512	0	0	0	0	26.5131	0	0	0	0	0	2.41774	1.63258	0	0	0	0	0	0	4.24784	0	0	0	0.881937	0	2.62463	0
	0	0	0	0	0	0	0	0	0	0.926039		0	0	5.26701	1.42642	0	0	0	0	0	0	0	0	0	0	0	0	16.2591	9.28426	0	0	1.0077	0	0	9.08559	0	0.983383	0	0	0	0.991185
	0	0	0	0.827233	0	0	0	0	0	0		0	0	0	0	0	0	0	0	0	0	0	0	42.1665	2.09266	0	0	0	0	0	0	0	0	0	0	0	0	13.6332	12.0667	0	0
	0	0	0	0	0	0	0	1.79733	0	0		0	0	0	0	0	0	0	0	0	0	0	0	0	0	0	94.4478	3.98565	0	0	0	0	0	25.3513	0	0	0	0	0	0	0
	0	0	0	0.840219	0	0	0	0	0	0		0	0	0	0.988213	0	0	0.821918	0	0.964135	0	0	0	0	0	21.7344	0	0	0	0	0	0	0	0	0	0	0.936518	0.892185	0	0	0
	0	0	0	0	0	0	0	0	0	0		0	4.19566	0	0	0	0	0	0	0	0	0	0	0	0	0	0	5.97182	0	18.372	0	0.776781	0	0	0	0	0	0	0	0	0
	0	0	0	0	0.848231	0	0	0	0	0		0	0	0	0	0	0.825219	7.28934	0	0	0	0	15.9718	0	0	0	0	0	0	0	0	1.56155	0	0	3.91975	0	0	1.2287	0	2.19181	0
	0	0	0	0	1.8349	0	0	0	0	0		0	0	0	0	0	15.2287	0	0	0	0	0	0	0	0.7837	0	0	0	0.733125	1.76943	0	0	1.32908	0	0.423061	0	0	0	0	0.473298	0
	0	0	0	0	0	0	0	0.664188	0.759739	0		1.5732	1.51794	0	0	0	0	7.06943	0	0	0	0	0	0	0	0	0	0	0	20.5987	0	0	0	0	0	0	9.15232	0	0	0.912492	0
	0	0	0	0	0.798363	0	0	0	0	3.15964		0	0	0	0	0.664327	0	5.20692	0	0	0	0	0.654307	0	0	0	0	0	0	0	0	0	0	2.8724	0	0	0	0	0	0	0
	0	0	0	0	0	0	0	0	1.7854	0.835715		0	0	0	0	0	0	17.3945	0	0	0	0	0	0	0	0	0	3.14398	2.24293	0	5.8533	0	0	0	0	0	0	1.06673	0	0	0
	0	0	0	0	0	0	0	0	1.84993	0		0	0	0	0	0	0	0.982449	0	0.966446	0	1.49182	0	2.66843	0	0	0	1.55691	0	0	0.747394	1.95304	0	0	0.852735	0	0	0	0	1.02238	0
	0	0	0	0	0	0	0.47105	0	0	5.66319		0	0	0	2.79843	0	3.24851	5.666	0	0	0	0	0	0	0	0.448827	0	0	0	0	0	8.47801	0	0	0	0	0	0	0	15.7757	2.23422
	0	0	0	0.67558	0	0	0	0	0	0.684048		0	0	0	0	0	0.671174	0	0	0	0.655177	0	0	0.823897	0	0	0	0	0	0	0	0	0	0	0	0	0	0	2.79445	0	10.8089
	0	5.78643	0	0	0	0.984602	0	0	0	1.78159		0	0	0	0	0	0	0	0	4.96812	0.671951	0	0	0	0	0	0	0	0	0	1.01539	0	0	0	0	0.733266	0	0	0	1.52342	0
	0	0	0	7.57344	0	0	0	0	1.77043	0.887495		0	0	0	0	0	17.4773	0	0	0	0	0	0	0	0	0	14.2212	1.13587	0	0	0	0	0	0	0	0	0	2.54023	0	0	13.1905
	0	0	0	0	0	0	2.19901	0	0	3.27526		0	0	0	0	0.332161	0.729904	0.340479	0	0	0	0	0.983794	1.01486	0	0	0	0	0	0.964765	0	0	0	0	0.333587	1.345	0	0	0	0	0
	0	3.46647	0	0	0	0	0	0.607875	0	0		0	0	0	3.70109	0	0	0	0	0	0	0	0	0	0	0	1.52347	0	0	17.9377	4.18111	5.06439	0	3.97747	1.24681	0	0	0	0	0	0
	0	0	0	0.764873	0	0	0	0	0	0		0	3.33275	3.23292	1.03063	0	0	0	0	0	0	0	0	0	0	0	0	2.0768	0	0	0	0	0	0	0.77872	1.33571	0	0	0	0	0
	0	0	0	0	0	0	0	0	0	0		0	0	0	0.677351	0	1.88789	0	0.701704	0	0	2.88699	0	1.04535	0	0	0	0	6.13832	0	0	0	0	0	0	1.09125	0	0	3.30592	1.05513	0
	0	0	0	0	0	0	0	0	0	0		0	0	0	0	0	8.50395	1.51657	0	0	0.717741	0	0	0	0	0	0	0	0	0	0	0	0	0	0.753279	0	0	0	0	0	0
	0	0	0	0	0	0	0	0	0	0		0	0	0	0	1.10156	1.10156	10.0315	0	0	0	2.4335	0	0	0	0	0	0	0	0	0	0	0	1.20653	2.07913	0	0	0	0	0	0
	0.310679	0	0	0	0.307999	0.36179	0	0	0	0		0	0	0	1.14249	0	18.0242	1.13686	0	0	0	0	0.849124	0	0	0	0	4.80226	1.80732	0	0	0	0	0	0.350515	0	0	0	0	0	0
	0	0	0	0	0	0	0	0.80424	2.48041	0		0	0	0	0	0	0.594455	1.78475	0	0	0	0	0	12.9536	0	0	0	0	0	0	0	0	0	0	0	0	0	0	1.34299	1.30652	0
	0	0.920028	0	0	0	0	0.81008	0	0	5.87886		0.878239	0	0.895863	0	1.88133	0	0	0	0	0	0	0	13.1444	0	0	0	0	0	1.40687	1.48791	1.70325	0	1.55709	0	4.32024	0	0	0	0	0
	0	0	0	0	0	0	0	0	2.11597	0		0	0	0	0	0.743782	3.12628	0.806601	0	0.683465	0	0.339893	0	0.361317	0	0	0	0	0	0	0	0	0	0	0.596105	0	0	0	0.722044	0	0
	0	0	0	0	0	0	0	0	0.944168	1.9788		0.631438	1.51673	0	0	0	0.652423	4.86099	0	0	0	0	0	0	0	1.22297	0	0	0	0	2.96139	0	0	0	0.847408	0	0.827631	0	0	0.828675	0
	0	0	0	0	0	0	0	0	0	0		0	0	0	0	0.607661	0	0.585127	0	0	0	0	0	0	0	0	0	0	8.53035	1.37841	0	0	0	9.70506	0	0	0	0	0	0	0
	0	0	0	0	0	0	0	5.06585	0	0		0	0	0	0	0	0	0	0	3.77895	0	0	0	0	0	0	0	0	2.76314	0	0	5.90032	0	0	0	0	0	0	0	0	0
	5.52087	0	0	0	0	0	0	0	0	0		0	0	0	0	0	0	0	0	0	17.5752	0	0	1.12416	1.06441	0	0	0	0	0	0	0	0	0	1.44238	0	2.13602	0	1.07635	1.18189	0
	0	0	0	0	0	0.889452	0	0.793951	0	0		0	0	0	0	3.57904	4.75006	0	1.24376	0	0	0	0	0	0	0	0	8.92193	0	0	3.7003	0	0	0	1.44341	6.2234	0	0	0	0	0
	0	0	0	0	0	0	0	0	8.44562	0		0	0	0	0	0	1.14672	2.64204	1.13666	0	0	0	0	0	0	0	0	0	0	0	0	0	1.15267	1.30486	0	0	0	0	0	1.27596	0
	0	0	0	1.0408	0	0	0	0	0.925449	0		0	0	0	0	0	0	0	0	0	0	0	0	0	0	0	3.27531	10.6746	0	0	0	0	0	0	0	0	0	0	0	0	0
	0	0	0	0.809242	0	0.765783	0	0	0	0		0	0	0	0	0	0	0	0	0.961168	0	0	1.00662	0	0	0	0	0	0	0	0	0	0	3.91739	0	0	1.07798	0	1.11949	0	0
	0	0	0	0	2.02918	0	0	0	0	3.05673		0	0	0	0	0	0	1.44247	0	1.69121	0	0	0	4.78608	0	0	0	0	0	0	0	0	0	0	1.00993	0	0.999195	0	0	0	0
	0	0	0	0	0	0	0	0	0.441988	0		0	0	0	0	0	3.93222	0	0	0	0	0	0	0	0	0	0	0	0	2.87045	0	0	0	0.711309	0	0	0	0	0	0	0
	0	0	0	0.775621	0.829554	0	0	0	0	0.852013		0	0	1.05724	0	0	0	5.00788	0	0	0	0	1.03321	0	0	0	0	0	0	0	0	0	0	4.1285	2.85036	7.95641	0	0	0	7.79546	0
	0.722752	0	0	0	0.84702	0	0	0	0	0.719187		0	0	0	0.585986	0	0	0	0.642712	0	0	0	0	0	0	0	0	0	0	2.21991	0	0	0	13.4931	0	0	11.016	0	31.0625	0	0
	0	0	0	0	0	0	0	0	0	0		0	0	0	0	0	7.33609	4.31059	0	0	0	0	0	0	0	0	0	0	0	0	0	0	0	0	8.19661	3.86363	0	0	0	0	0.78253
	0	0	0	0	0	0	0	0	0	0		0	0	0	0	0	0	0	0	0	5.77848	0	1.02397	0	0	0	0	2.00111	0	0	0	0	0	0	0	0	0	0	0.704853	0	0
	1.19419	0	0	0.604844	0	0	0	0	0	0		0	0	0	0.755489	0	0	0	0.807591	1.03832	0	0	0	1.85888	0	3.22329	0	0	1.628	1.55969	0	0	0	0	0	0	0	0	0	0	0
	0	0	0	0	0	0	0	0	0	0		0	0	0	0	0	0.542005	0	0	0	0	6.39171	10.8179	7.90396	0	0	0	0	5.3405	2.7683	0	0	0	0.747054	0.770613	0	0.839086	0	0	0	0
	0	0	0	0	0	0	0	0	0	0		0	0	0	0	0	0	0	0	0	0	0	0.70467	1.44961	0	0	0	0	5.2355	0	0	0	0	1.52004	1.34975	0	0	0	0	0	0
	0	5.27824	0	0	0	0	0	0	0	0		0	0	0	0	0	0	15.4999	0	0	0	0	0	0	0	0	0	0.84487	0	0	0	0	0	0	1.08328	1.26456	0	0	1.13049	3.29201	0
	0.859794	0	0	0	0	0	0	0	0.831143	0.849355		0	0	0	0	0	11.3814	0	0	0	0	0	0	0	0	0	0	0	31.542	2.61025	0	0	0	0	0	0	0	0	0	0	0
	0	0	0	0	0	0	0	0	0	2.55378		0	0	0	0	0	0	0.80502	0	0	0	0	0	0	0	0	0	1.01336	1.06233	1.02079	0	0	1.16868	5.03617	0	0	0	0	0	0	1.18526
	0	0	0	0	0	0	0	0	0	0		0	0	0	0.673912	0	0	0	0	0	0.63908	0	0	0	0	0	0	0.512851	0	0.505607	0	0	0	0	0	0	0	0.690369	0	1.43519	0
	0	0	0	17.5077	0	0	0	1.52449	0	0		0	1.28202	0	0	1.21979	0	0	0	0	0	0	0	0	0	0	0	0	0	0.708134	0	0	0	5.5077	4.23503	0	0	0	0	0	0
	0	0	0	0.612464	0	0	0	0	1.81091	0.56096		0	0	0	0	0	0	0	0	0	0	8.73683	0	0	0	0	0	0	0	2.27534	0	0	0	2.32801	2.59083	0	0	0	8.12743	0	0
	0	0	0	0	0	0	0	0	0.918572	0		0	0	0	0	0	0	0	0	0	0	0	0	0	0	0	0	0	0	1.31436	0	0	0	1.15093	0	0	0	0	0	0	0
	0	0	0	0	0	0	0	0	0	0		1.05804	1.0795	0	1.0449	0	0	0	0	0	0	0	0	0.629819	0	0	0	0	0	0	0	0	0	0	7.65252	0	0	0	0.569733	0	0
	0	0	1.82873	3.12877	1.45942	0	0	0.894863	3.75146	0		0.724866	0	0.746671	0	0	0	0	0	0	0	0	0	0	0	0	0	0	0	0.634216	0	0	0	0.924826	0	9.9123	0	0	0	0	0
	0	0	0	0	0	0	0	0	0	2.67874		0	0	0	0	0	0.919682	0.818965	0	0	0	0	0	0	0	0	0	0.786202	0	0.814399	0	0	0	0	3.01232	4.02903	0	0	0	0	0
	0	0	0	0	0	0	0	0	0	0		0	0	0	0	0.569219	0.535823	0	0	0	0	0	2.07731	1.11735	0	0	0	0	0	0	0	0	0	0	0	0	0	0	0	2.43809	0
	0	0	0	0	0	0	0	0	0	0		0	0	0	0	0	0.859944	0	0.944981	0	0.89706	0	0	2.37203	0	0	13.2029	0	0	0	0	0	0	0	0	0	0	0	0	0	0
	0	0	0	0	0	0	0	0	15.1919	0		0	0	0	0	0	0	0	0	0	9.2407	0	0	0	0	1.03853	0	0	0	0	0	0	0	0.623994	0	0	0	0.673687	0	0.662576	0
	0	0	0	0	0	0	0	0	0	0		0	0	0	0	0	0	3.19194	0	0	0	0	0	7.78266	0	0	0	0	1.7479	0	0	0	0	0	8.67798	0	0	0	0	0	0
	0	0	0	0	0	0	0	0	0	0		1.58699	0	0	0	0	0.718963	0.7644	0	0	0	0	0	1.02891	1.02891	0	0	2.09048	0	0	0	0	0	0	0	0	1.80384	0	0	1.62619	0
	0	0	0	0	0	0	0	0	2.35193	0		0	0	0	0	0	0.898471	0	0	0.910404	0	0	0	0	0	0	0	0	0	0	0	0	0	0.499391	1.04715	0	0.550495	0	0	0	0
	0	0	0	0	0	0	0	0	0	0		0.714872	0	0	0	0	1.42938	0	0	0	0.839253	0	0	0	0	0	12.7381	21.599	0	0	4.32171	0	0	0	0	0	0	0	0.805433	0	0
	0	0	0	0	1.4586	0	0.658206	0	0	0		0	0	0	0	0.382248	0	0	0	0	0	0	0	0	0	0.757684	0.969365	0	0	0	0	0	0	27.9691	0	0	0	0	0	0	0
	1.4023	0	0	0	0	0	0	5.02426	0	4.89729		0	7.72579	0	4.45825	9.68211	0	0	1.79351	0	0	5.70941	1.15162	1.14634	0	0	0	0	0	0	0	0	0	0	58.6345	0	0	3.043	0	0	0
	0	0	0	0	0	0	0	0	0	0		0	0	0	0	0	0	0.445836	0.369035	0	0	0	0	0	0	0	0	0	0	0.895715	0	1.26099	1.24863	0	0	0	0.60536	0	0	0	0
	0	0	0	0	0	0	0	3.71817	0	0		0	0	0	0	0.385598	0.669017	0	0	0	0	0	0	0	0	0	0	0	0	1.00229	0.857214	0	0	0	0	0	0	0	0	19.0761	13.3646
	0	0	0	0	0	0	0	0	6.92248	1.44075		1.14075	0	0	0	1.07812	0.876615	0	0	0	0	0	0	0	1.42192	0.70302	0	0	0	0	0	0	2.06585	0	3.3935	0	0	0	0	0	0
	0	0	0	0	0	0	0	0	0	18.4952		0	0	0	0	0	0	0.438959	0	0	0.445691	0	1.03239	0	0	0	1.0069	0	0	0	0	3.89019	0	0	22.4262	0	0	1.98918	0	0	0
	0	7.78269	0	0	0	0	0	0	0	11.2391		0	0	0	0	0	0	0.571135	0	0	0	0	0	0	0	1.45363	0	0	0	0	0	0	0	0	0	0.877452	0	0.864079	0	0	0
	0	5.0005	0	0	0	0	0	0	0	4.11068		0	0	0	0	8.18618	0	0	0	0	0	0	0	0	0	0	0	0	46.4375	3.00107	0	0	0	0.811633	0	3.34295	0	0	0	0	0
	0	0	0	0	0	0	1.55844	0	0	0		0	0	0	0	2.52042	20.4966	0	0	0	0	0	0	0	0	0	0	0	9.82424	20.1074	0	0	0.920481	3.12694	0	0	0	0	0	0	0
	0	0	0	0.321921	0.309606	0	0	0	0	0		0	0	0	0	1.1699	0	0	0	0	0	0	0	0	0	0	0	0	7.95258	8.67174	0	0	0	0	2.44591	2.60796	0	1.19205	1.17869	0	0
	0	0	0	0	1.1621	0	3.00068	2.55232	0	0		0	0	0	0	0	0	0.357939	0	0	0	0	0	0	0	0	0	0	17.521	6.47057	0	0	0	0	0	1.91431	0	0	0	0	0
	0	1.12782	0	0	0	1.0914	1.03626	0	0	0		0	0	0	0	0	0	0	0	1.4035	0	0	0	0	0	0	0	0	10.7984	9.54235	0	0	0.698891	0	0	0	0	0	0	2.21372	0
	0	0	0	0	0	0.638627	0	0	0	0		0	0	0	0	0	0	0	0	10.5901	0	0	0	0	0	0	0	0	0	0	15.1143	0	0	0	0.633131	0.637897	0.637699	0	0	0	0
	0	0	0	0	0	1.0794	0	0	0	0		0	0	0	0	0	0	0.80269	0	0.886609	0	0	0	0	0	8.97287	0	0	0	0	0	0	0	0	0	0	0	0.87641	0	0	0
	0	0	0.706434	0	0.755502	0	0	0.785966	0	0		0	0	1.03946	0	0	0	0	2.18372	0	0	0	0	0	0	0	0	0.597557	0	0	0	0	0	0	0	1.09984	0	0	0	0	0.488489
	1.71996	0	0	0	0	0	0	0	0	0		0	0	0	0	0	0	0	0	0	0	0	0	2.54053	0	0	0	1.19768	0	0	0	2.34785	0	0	0	0	0	0	1.52949	0	0
	0	0	0.752767	0	0	0	0.677704	0.677704	0	0		0	0	1.87447	1.75241	0	0	12.8555	0	5.02907	0	0	3.04859	0	0	0	0	0	0.864663	0	0	0	0	1.06495	0	0	0	0	1.22137	0	0
	0	0	0	2.69897	0	0	0	5.94764	0	0		0	8.24022	14.793	0	0	0	0	0	0	0	0	0.582141	0	0	0	0	0	0	0	0	0	0	0	0	0	0	1.26218	1.12534	0	0
	0	0	0	0	1.12502	0.997509	0	1.05707	0	0		0	0	0	0	0	2.47915	0	1.31684	1.23876	0	0	0	0	0	0	0	28.1724	0	0	0	0	0	0	2.32217	0	0	0	1.39582	0	0
	0	0	1.32934	0	0	0	0	0	0	0		0	2.11902	0	0	0	0	0.992111	0	0	0	0	0	0	1.52237	0	0	0	0	1.29263	0	2.62334	0	0	0	0	0	2.5421	1.34148	5.9477	1.41781
	0	0	0	0	0	1.89666	0	0	0	0		0	0	0	0	0	0.536712	0	0	1.3281	0	3.36472	0	0	0	0	0	0	0	0.895882	0	0	0	0.78855	0	0	0	0	0	1.46053	0
	2.28334	0	0	0	0	1.35385	0	0	0	0		2.51574	1.68828	0	0	0	0	0	0	0.689987	0	0	0	0	0	0	0	1.54996	1.91119	1.3696	0	0.983764	0	0	0	0	0.808017	0	0	0	0
	0	0	0	0	0	0	0.728668	5.39425	0	0		0	0	0	0	0	0	0.995228	4.86049	3.07363	0	3.67254	0.93354	0	0	0	0	0	0	0	0.913773	0	0	0	1.18909	0	0	0.542971	0	0	4.08737
	0	0	0	0	0	0	0	0	0	0		7.76941	11.4492	0	0	0	0	0	0	0	0	0	0	0	0	0	0	0	0	0	0	0	0	0	1.00416	0.98429	1.06841	0.952143	0	0	1.33767
	0	0	0	0	0	0.794899	1.78773	0	0	0		0	0	0	0	0	0	0	0	0	0	0	0	0	0	1.20075	0	0	0	0	0	0.416976	0.408866	0	0.875652	0	0	0	0	0	0
	0	0	0	0	1.11809	0	0	0	3.33058	0		0	0	0	0	0	0	1.02071	0	1.01111	0	0	0	1.03233	0	0	0	0	0	0.992825	0	0	1.38457	0	0	0	0	0	0	1.24947	0
	0	0	1.14082	0	0	1.17656	0	0	0	0		0.353244	0	0	0	0	0	0	0	0	0.3456	9.22128	0	4.00733	0	0	0	0	0	0	0	4.08679	2.22271	0	0	0	0	0	0	0	0
	0	0	0	0	0	0	0.693312	0	0	0		0	0	0	0	0	0	0.767869	0.616287	0	0.658029	34.0039	0	0	0	0	0	0	0	0	0	0	0	0	0	0	0	0	1.37932	0	0
	0	0	0	3.15407	3.55552	0.984244	0	0	0	0		0	0	0	0	1.48211	1.51231	0	1.56818	0	0	0	0	0	0	0	0	0	0.871064	0.746443	0	0	0	0	0	0	0	0	0	8.97949	0
	0	0	0	0	0	5.31693	0	0	0	0		0	0	0	7.12612	1.23781	0	0	0	0	0	0.798898	0	0.833589	0	0	0	0	0	0	0	1.18489	0	0	0	0	0	0	2.77741	0	1.15382
	0	0	0	0	0	0	0	0	0.895663	0		0	0	0	0	1.43799	0	0	0	0	0	0	0	0	0	0	0	17.8574	0	0	0	1.27388	0	0	0.777492	0.660135	0	0	0.81338	0	0
	1.41471	0	0	0	0.879532	0	0	0	0	0		0	0	0	2.34065	0	0	0	0	1.20458	1.09004	0	0	0	1.02448	0	0	0	0	0	0	0	0	0	0	0	0	0	1.86624	0	0
	0	1.52502	0	1.16854	0	0	0	3.88358	0	0		0	0	0	0	0	0	0	0	18.5583	0	0	0	0	0	0	0	0	2.11306	1.23164	0	1.26899	0	0	0	0	1.05084	0	3.42673	1.39699	0
	0	0	0	0	0	0	0	0.354048	0	0		0	0	0	0	0.849415	0	0	0	0	0	0	0	0.63055	0.63055	0	0	0	0.592325	0	0	0	0	0	0	0	0	0	1.0431	0	0
	0	0	0	0	0	0	1.98127	3.56724	0	0		0	0	0	0	0	0	1.24241	0	1.25544	0	0	0	0	0	0	3.25934	0	0	0	0	0	0	0	20.6295	6.93051	0	0	2.37845	0	0
	0	0	0	0.852685	0	0	3.08365	0	0	0		0	0	0	0.457899	0	0.486417	0	0	0	0	0	0	0	2.18258	0	0.724104	0	0	0	0	0	0.994601	1.11141	2.13684	0	0	0	1.03649	1.01458	0
	0	0	0	0	0	0	2.13456	2.00514	0	0		0	1.30212	1.23871	1.44618	1.20595	0	0	0	0	0	0	0	0	2.32281	0	0	0	1.51691	0	0	0	0	0	0	0	0	0	1.27759	1.47948	1.18326
	0	0	0	0	0	0	0	0	0	2.23766		0	0	16.223	0	0	1.91685	0.90717	0	0	0	0	0	0	0	0	0	0	0.99713	1.04971	0	0	0	0.542912	0	0.565401	0	0.508344	0	0	0
	1.42271	0	0	0	0	0	0	0	0	1.11938		0	0	0.781776	0	0	0	0	0	0.917133	0	0	0	1.26221	0	2.61536	1.29851	1.2527	0	0	1.31752	0	0	5.80742	0	0	0	0	0	0	14.5124
	0	0.585153	0	0.617957	3.50884	0	0.576588	0	0	0		0	0	0.98715	0	0.957485	0	0	0	0	0	0	0	0	0	0	0	0	2.03767	0	1.28313	0	0	0	0	0	0	1.02303	0	0	0
	0	0	0	0	0	0	2.31971	0	0	0		0	0	0.508178	0.508178	0	0	0	0	0.51742	0	0	0	13.2486	0	0	0	0	0	0	0	0	0	0	3.66528	11.9794	0	0	0	18.5184	0
	0	0	1.31432	0	1.31676	0	1.30932	0	0	1.29272		1.20318	1.44949	1.48389	0	0	0	14.2888	0	0	0	0	0	3.8605	0	0	0	0	0	0	0	0	0	1.66054	2.80599	0	0	0	0	0.77355	0
	0	0	0	0	0	0	0	0	0	0		0	0	0	0	0	0	0	0	5.16766	0	0	0	0	0	0	0	0	1.10359	0	1.07698	0	0	0	0	0	0	0	1.25601	1.19182	2.53853
	0	0	0	0	0	33.0825	13.4701	0	0	0		0	0	0	0	0	0	0	0	2.01499	0.540126	0	0	0	4.75867	0	0	0	0	0	0	0	0	0	0	0	0	0	0.889547	0	0
	0	0	0	1.38603	1.17461	3.67239	0	0	0	0		0	0	0	0.890857	0.888258	0	0	0	0	0.923233	0	0	0	0	0	0	0.89238	0	2.11209	0	0	0	0	0	0	0	0	1.17284	0	0
	0	0	0	0	1.29476	0	0	0	0	0		0	0	0	0	0	0	0	0	0.805056	0	0	0	0	0	0	0	0	0	0	0	0	0	0	0	0	1.06326	0	0	0	0.942898
	0	0	0.954002	0.974804	0	0	0	0	0	0		0	0	0	0	1.14122	0	0	0	0	0	0	0	0	0	0	0	0	0	1.00096	0	0	0	0	0	0	12.7094	8.74465	0	0	0
	0	0	1.32675	0	0	3.65706	1.02768	0	1.882	0		0	1.10431	0	0	0	0	0	0.970863	0	0.971417	1.00943	2.10543	0	0	0	0	0	0	2.1228	0	0	0	0	0	0	0	0	0	2.63817	0
	0	0	0	1.18843	1.0947	0	0	0	0	0		0	0	0	0	0	0	0	0	0.820092	0	0	0	0	0	0	0	0	0	0	0	0	0	0	0	1.03042	1.02967	0	0	0	0
	0.432744	0	0.46005	0	0.474491	0	0	0	0	0		0	0	0	0	0.594573	0	0	0	0.540944	0	1.64919	0	0	0	0	0	0	2.72152	0	0	0	0	1.3281	0	0	0	0	1.2608	0	0
	0	0	0	1.64186	0	0	0	0	0	0		0	0	0	0	0.766988	0	0	0	0	0	0	0	1.44722	0	0	0	0.649211	3.10995	0	0	26.656	0	0	0	0	0	0	0	0	0
	0	0	0.943899	0.892224	1.10379	0.986492	0	1.01413	0.96347	0		0	0	0	0	0	0	0	0	0	0	0	0	0	0	0	0	0.780908	0	1.50653	0	0	0	0	0	0	1.87975	0	0.580945	0.627738	0
	0	0	0	0.482066	0	0	0	0.494162	0	0		0	0	0	0	0	0.554633	0	0	0.509739	0	0	31.2476	0	1.68185	7.00246	0	0	0	0	0	0	0	0.711361	0	0	0	0	0	0	0
	0	0	0	3.23405	0	0	0	0	0	0		0	0	0	1.21175	0	0	0	0	1.31709	0	0	0	0	0	0	0	5.81148	2.55273	0	0	0	1.00615	0	0	0	0	0	1.10735	0	0
	0	0	0	0	2.90268	16.4107	0	0	0	0		0	0	0	0	0	0	0	0	0	0	0	0	0	0	0	0	0	0	0	8.03268	0	0	0	0	0	1.1364	0	0	0.363086	4.15059
	0	0	0.982997	1.98412	1.11331	0.992727	1.15968	0	0	0		0	0	0	0.988409	0	1.02908	0	0.966249	2.04895	0	0	0	0	0	0	0	0	0.895471	0	0	0	0	0.848125	0	0	0	0	0.816576	0	0
	0	0	0	3.50435	1.00678	0	0	2.3291	0	0		0	0	0	0	0	1.03051	0	1.06984	5.29946	0	0	4.84312	5.40261	0	0	0	0	0	0	0	0	0	0	0	0.971083	0	0	0	1.79215	1.014
	0	0	0	0	0	0	0	0	0	0		0	0	0	1.11743	0	0	0	0	0	0	0	0	0	0	0	0	0	2.78288	0.756673	0	0	0	4.93307	9.97656	0	0	0	0	2.38262	0
	0	0.549284	0	0	1.22183	1.7133	0	0	0	0		0	0	0	0	0	0	0	0	0	1.15202	1.11797	0	0	1.27536	0	0	0	0	0	10.5077	0	0	0	0	1.4256	0	0	0	0	0
	0	0	4.24935	0	1.25634	0.625034	0	0	0	0		0	0	0	0	0	0.703088	0	0	0	0	0	0	0	4.76775	0	0	50.8844	0	0	0	1.14923	0	0	0	0	0	0	0	0	0
	0	0	0	0	6.34378	3.89276	0	0	0.710167	0		0	0	0	0	0	0	0	7.3994	0	0	0	0	0	0	0	0	1.68092	0	1.23928	0	5.56546	0	0	0	15.1143	7.01537	0	2.39429	0	0
	0	0	0	2.58896	0	0	0	0	0	1.17811		0	0	0	0	0	0	0	0	0	0	10.5352	0	0	0	0	0	0	0	0	0	0	0	0	0	0	0	0	0	0	0
	0.971572	0	0	0	0	0	0	0	0	0		0	0	0	0	0	2.28121	1.47235	0	0	1.04825	3.44314	0	0	0	0	1.61581	0	0	1.62323	0	0	0	0	0	0	0	0	0	2.20468	0
	0	0	1.26032	4.22987	0	0	0	0	0	0		0	0	0	0	0	0	0	0	0	0	0	0	0	21.3258	0	0	0	0	0	0	0	0	0	0	6.34189	1.95085	0	0	0	0
	0	0	0	0	0	1.02666	0	0	0	0		1.30537	0	1.0931	1.02523	0	0	0	0	0	0	0	0	1.04693	6.4153	0	0	0	0	6.03641	0	0	0	0	7.47724	6.68098	1.74338	0	1.76771	0	0
	0.607283	0	0	0	0	0.537141	0.552066	0	0	0		0	2.70365	3.14008	0	3.17892	0	0	0	0	0	0	0	0	15.0024	0	0	0	0	1.69418	0	0	0	0	0	0	0	0	0.597587	0	0
	0	0	0	0.342774	0	0	0	0	0	0		0	0.810409	0	0	0	0	0	0	0	0	0	0	0	0	0	0	2.01341	16.6283	0	0	28.1667	7.90373	0	0	0	0	0	0	0	0
	0	0	8.0795	0	0	0	0	0	0	0		1.19493	0	0	0	0	1.22902	1.09912	0	0	0	1.21168	0	0	5.10489	0	3.74355	1.54613	1.54613	0	0	1.03061	0	6.93879	1.05909	0	4.84144	0	0	1.42533	0
	0	0	0	0	0	0.578966	0	0	0	1.28021		0	7.47215	3.1009	0	0	0.812354	0	0	0	0	0	0	0	6.3192	0	0	0	0	0	0	0	0	11.6745	1.83467	0	14.4778	0	0	0	0
	0	0	0	2.77226	0	0	0	2.26231	0	0		1.19277	0	0	0	0	0	0	0	0	0	0	0	0	2.02252	0	2.79164	0	0.869269	0	0	0	0	0	0	0	21.2747	0	0	0	0
	0	0	0	0	0	0	0	1.13421	0	0		0	1.45421	5.56253	7.11705	0	0	0	0	0	0	25.6405	0	0	0	0	0	0	0	0	0	0	0	0	0	0	0.716152	0	0	0.663188	0.657791
	1.19696	0	0	1.14959	0	0	0	0	0.967598	0		0	0	0	0	0	0.95029	0	0	2.07171	0	0	0	0	0	0	0	5.51699	11.9756	0	0
	0	0	0	0	0	0	0	0	0	0		0	0	0.397367	0	0	0	0	0.850164	0	0	0	0	0	0	0	0	7.8323	26.089	0	0	1.21742	0	0	1.37914	0	0	0	0	0	0
	0	0	1.60544	1.36258	0	0	2.69297	0	0	0		0	3.4451	0	1.80708	0	0	0	0	0	0	0	0	0	0	0	0	0	0	1.73483	20.4907	0	0	0	0	0	0	1.13334	1.37349	0	1.13731
	0	0	0	0.585093	0.573089	0	0	0	0	0		0	3.83431	10.3803	0	1.87873	0	0	0	0	0	0	0	0	0	0	0	0	0	0	20.0185	0	0	0	1.38092	2.56834	0	0	1.1484	0	0
	2.02942	0	0.509251	0	0	0	0.523131	0	0	0		0	0	0	0	0	0	0	0	0	0.453665	0	0	0	0	0	0	1.02339	3.57482	0	0	0	1.46641	0	0	0	1.37165	0	1.43802	1.49017	1.58847
	0	0	0	0	0	0	0	0	0	0		0.459442	0	0	0	0	0	0	0	0	0	0.92513	0	0	0	0	0	2.67588	7.5383	0	2.03796	0	0	0	0	7.2771	0.896166	0	0	0.925608	0
	0.648372	0	0	0	0.646518	0	0	0	0	0		0	0	0	0.877615	1.46168	0	0	0	0	0	0.981957	0	0.820885	0.820885	0	0	0	2.66936	0	0	0	0	0	0	0	0	8.245	0	0	0
	0	0	0	0	0	5.31439	0	0	0	0		0	0	0	0	0	0	1.25856	1.23244	13.0453	0	0	0	0	0	0	0	0	0	0	0	0	0	0	1.1109	9.26952	1.28909	0	0	0	2.28533
	0	0	0	0	0	0.429991	0.89292	0	0	0		0	0	0	0	0	0	0	0	0	0	2.61284	1.97538	0	0	0	0	0	0	0	0	0	0	0	0	11.0655	0	0	0	0	9.43719
	0	0	0	0	0	3.29743	1.06034	0	0	0		0	0	0	0	0.969612	0	0.891577	0.902617	0	0	0	0	0	0	0	0	0	0	0	0	0	0	0	0	4.80559	0	0	0	0	1.45673
	0	0	1.08387	0	0	1.00966	0	5.25471	0	0		0	0	1.45893	2.2333	0	0	0	0	0	0	0	0	1.01568	0	1.32929	1.10578	0	0	0	1.19	0	0	0	0	0	0	0	0	0	0
	0.556318	0	0.577779	0.622437	0	0	0	0	0	0.671942		0	0	0	0	0	8.09773	0	0	0	0	0	0	0	0	0	0	0.578781	0.635454	0	0	1.20016	0	0	0	0	2.46331	1.24579	0	0	0
	1.08495	0	1.00223	0	1.35169	0	0	0	0	0		0	0.998932	3.42418	0	0	0	0	0	0	0	0	0	1.28581	0	0	1.29235	2.82789	0	6.28508	0	0	0	0	0	0	0.807967	0	0	0.772431	0
	0	0	0	0	0	0	0	0	62.5082	0		0	1.04649	1.14162	0	0	0	0	0	0	0	0.820195	0	0	0	0	0	0.949687	0	0	0	2.79236	0	1.43203	0	2.91206	28.9774	0	0	0	0
	0	0	0	0	0	2.97318	0	0	0	0		0	0	0.408317	0	0	0	0	0	0	0	3.17314	0	0	4.84872	1.65612	0	0	0	0	9.99442	0	0	0	0	0.871317	0	0	0	0.658799	0
	1.59993	0.9281	1.5458	0	0	0	0	0	0	0		0	0	0	0	0	0	0	0	9.18576	0	0	0	0	0	12.9515	12.3697	0	0	0	0	0	31.2146	57.1637	0	0	0	0	0	0	0
	0	0	0	0	0	0.253261	0	0	0	0.252834		3.4993	0	0	0	0	3.34958	5.20076	0	0	1.68614	0	0.612314	0	0	0	0	0	0	0	0	0	5.66147	0	0	0	0	0	1.88986	0	0
	0	0	0	1.0249	0	0	6.61393	0	0	0		1.60923	0.728229	0	0	0	0	0	0	0.766055	0.705541	0	0	0	0	19.8352	4.22203	9.984	0	0	0	0	0	1.03624	0	0.84179	0	0	0	5.281	0
	0	0	1.1979	0	0	0	0	2.88325	0	5.22384		0	1.03494	0	1.10702	0	0	0	0	0	1.07455	0	0	0	0	0	16.7907	0	0	0	0	0	0	0	0	0	0	0.582972	0.590891	0.593249	0
	0	0	0	0	2.84811	24.1712	0	0	0	1.16562		0	0	0	0.372168	0	0	0	0	0	0	0	0	0	0	0	0.763705	0	3.53181	0.805286	0	0	0	0.70738	0	0.729476	0	0	0	0	0
	0	0	0	0	0	0	1.36801	4.10935	0	0		0	0	0	0	0	0	0	0	0	0	0	0	1.57994	0	0	0	0	0	0	0	0	0	0	0	0	0	0	0	0.869769	0
	0.567522	0	0	0	0	0	0	0	0	0		0	0	0	0	0	0	1.36174	2.24554	0	0	0	2.798	2.63098	0	0	0	0	0	0	1.5584	0	0	0	0	1.03483	0	0	3.85385	0	0
	0	0	0	0	0.537505	0	0.482245	0	0	0		0	0	0	1.42895	0	0	0	0	0	0	0	0	0	0	0.512218	0	0	0.501278	0	0	0	0	0	0	0	0	0	0	0	2.47846
	0	0	0	0	9.50936	0	1.28381	0	11.1081	0		0.778457	0	0	0.685173	0	0	0	0	0	0.740576	0	0	0	14.5017	34.013	4.07124	0	0	0	0	0	0	0	0	0	0	37.9237	0	8.74202	0
	0	0	1.16004	2.6069	0	0	0	0	0	0		0	0	0	6.21025	0	0.726778	3.76742	0	0	0	0	0	0.813513	0	0	0.521691	0	0	0	0	0	0.791902	0	0	0.758039	0	0	0	0	0
	0.676322	0	0	0	0	0.821795	1.37559	0	0	0		0	0	1.14797	0	0	0	0	0	0	0	0	0	3.27614	1.09526	0	0	0	0	0	0	0	0	0	0	0	15.9862	5.08744	0	0	0
	0	0	0	0	0	0	0	0	0	0		0	0	0	0	0	0	0	0	8.6777	4.16643	0	0.776738	5.73665	0	0	0	0	0	0	0	0	0	0	0	0.619471	0	0	0	0	0
	0	0	0	0	0	0	0	1.3872	0	0		0	0	0	0	0.851967	0	0	0	0	1.93354	0	0	0	0	0	0	0	0	1.31313	0	0	0	0	2.34325	0	0	0	0	0.92844	0
	0	0	2.54922	0	0	0	0	0	0	0		0	0	0	0	0	0	0	0	0	0	19.8583	0	0	4.87404	16.4848	0	0	0	0	0	0	0	0	0	0.924311	0	0	0	0	0
	0	0	0	0	0	0	2.11878	0	0	0		0	0	0	0	0	0	0	0	0	17.2683	0	0	0	6.46916	8.78811	6.62236	0	0	21.6635	11.8788	0	0	12.0765	25.0515	0	0	0	0	0	0
	0	0	0	0	0	0.852354	0	0	0	0		0	0	0	0	0	0	0	15.1585	6.64416	0	0	0	0	0	0	0	0	0	0.56834	0	0	0	0	0	2.63058	0	0	0	0	0
	0	0	0	0	0	0	0	0	0	0		0.703385	0	0.674691	0	0	1.46933	0	0	0	3.34395	8.21951	0	0	0	0	2.74852	0	0	5.90673	0	0	0	0	0	0	0	8.85861	21.0723	14.4517	0
	0	0.468271	0	0	0	0	0	0	0	0		0	0	0	0	1.38383	9.21633	0	1.3871	1.40481	0	0	0	0	11.799	5.51102	0	0	0	0	0	0	0	0	0	0	2.44561	0.965135	0	0	0
	0	1.97341	0	0	0	0	0	0	0	3.29468		0	0	0	0	0	0	8.72431	0	0	0	0	0	0	0	0	0	9.03368	0	0	1.77339	1.59904	2.23163	0	0	0.740925	0	0.728043	0	0	0
	0	0	0	0	0	0	0	0	0	0		0	0	0	0	0	0	0	0	0.936912	0	0	0	0	0	0	0	1.10534	0	1.14854	0	0	0	6.48309	0	0	0	0	0	0	3.25026
	0	0	0	0	0	0	0.35296	0	0.349636	0		0	0	0	0.450288	0.39693	0	0.41938	0	0.450193	0	0	0	0	0	0	0.729974	0	0	0.742848	0	0	0	0	0	0	0	0	0	0	0
	0	0	0	0	0	0	0	0	0	0		0	0	1.62077	5.97863	1.76178	0	0	0	0	3.97255	0	0	0	0	0	8.01682	0	0	0	0.953247	0	0	0	0	1.09465	3.86459	0	0	3.11707	1.99626
	1.36154	0	1.26287	0	0	0	0	0	0	0		0	0	0	0	0	0	0	0	2.2835	0	0	0	3.12581	0	0	0	0	0	1.38308	0	0	15.5899	0	0	0	0	0	0	4.81745	3.15472
	0	0	0	0	0	0.571767	0	0	0	1.0999		0	0	0	0	0	0	0	0	0	0	0	0	0	0.555081	0	4.20286	0	0	0	0	0	0	1.9074	2.36491	0	0	0	0	0.437797	0
	0	0.698424	0.583677	0	0	0	0	0	0.627352	0		0	9.22831	0	0	4.39035	6.91878	0	0	0	0	0.456919	0	0	0	0	1.78185	0	0	0	0	0	0	0	0	0	0	0	0	0	7.36413
	0	0.595409	0.564851	0	0	0	0	0	0	0		0	0.862642	1.97901	5.29126	0	0	2.64987	0	0	0	6.19571	0	0	0	0	1.62341	0	0	0	0	0	0	0	0	0	0	0	0	1.02961	0
	0	0.403094	0	0	0	0	0	0	0	0		0	0.935588	0	0	18.0611	0	0	0	0	0	0	4.82324	8.92373	0	5.5683	1.85944	0	1.68866	0	0	0	0	0	0	12.5105	0	0	0	1.59222	0
	0	0	0	1.43714	0	0	0.571971	0	0	0		0	0	0	4.36354	0.95337	0	0	0	0	0	0	0	0	0	7.98918	0	0	0	0	0	0	0	0	0	1.23665	12.3222	0	0	0	0
	1.32455	0	1.34984	1.24827	1.23367	0	0	1.29768	1.20971	1.63569		0	0	0	0	0	33.6326	0	0	0	0	0	0	0	0	0	0	0	1.04742	0	0.914985	1.09779	0	0	0	0	0	1.27386	0	0	0
	0.756852	0.744207	0	0	0	0	0	0	0	0		0	0	0	0	0	1.04611	2.855	0	0	0	0	0	0	1.03382	0	0	0	0	0	0	6.02945	1.41623	5.70728	1.30986	0	0	0	0	0	0
	0	0	0	0.752963	0	0	0	1.6896	0	0		0	0	0	0	0	0	0	0	0	0	0	0	0	0	0	0	18.4024	0	0	0	1.60617	0	0	13.4624	0	0	0	0	0	0
	0	0	0	0	0	0	0	0.661981	0	0.597093		0	1.02794	0	1.00472	0	1.00179	0	0	0	0	0	0	10.3441	0	0	12.4801	6.46602	0	0	3.56934	1.47491	0	0	1.78141	0	3.0734	0	0	0	0
	0	0	0	0	0	0.434162	0.424209	0	0	0		0	0	0	0	1.06853	0	1.09398	0	0	0	0	0	0	1.3146	2.64815	0	2.73485	0	0	0	1.15425	0	0	0	0	1.1933	0	0	0	0
	0	0	0.889627	0	0	0	0	0	0	0.90961		0	0	0	0	0	0	0	0.783981	0	1.20741	0	0	0	8.48727	1.99898	4.02934	1.96759	2.31751	0	0	23.7474	0	0	0	21.9772	0	0	0	0	0
	0	0	0	0	0	0	0.351834	0	0	0		0	0.79518	0	0	0	0	0	0	0	0	0	0	0	4.01601	0	0	0	0	0	0	0	60.2163	8.94652	0	0	0	0	0	0	0
	0	2.1643	0	1.29578	0	0	0	0	0.994878	0		0.660384	0	0	0	0	0	0	0	0	0	0	0	0	0	0	0	0	0	2.94713	1.51667	0	0	0	29.7346	9.77822	0	0	0	0	0
	0	0	0	0	0	0	0	1.33833	0	0		0	0	0	0	0	0	0	0	0	0	0	1.77832	1.57789	0	0	0	0	0	0	1.61965	2.36841	0	0	0	0	0	0	0	0	1.76355
	0	1.29908	0	0	0	0	1.60826	0	0	0		0	0	0	0	0	15.2197	0	0	0	0	13.9066	0	0	0	0	0	0	0	0	0	0	0	0	0	0	0	0	0	0	21.56
	1.25161	0	1.08666	0	0	0	1.05753	0	0	0		0	0	0	0	0	0	0.84462	0	0	0	0	0	0	0	0	2.07464	0	13.461	0	0	25.4347	0	4.53971	0	0	0	0	0	0	0
	0	1.58012	1.84331	0	0	0	0	0	0.346048	0		2.4555	0	0	0	0	0	0	0	0	0	0	0	0	2.39507	0	0	0	0	0	3.47865	30.4108	0	0	0	0	0	0	0	0	0
	0	0	0	0	0	0	3.89637	0	0	0		1.13449	0	0	1.12867	0	1.36389	0	1.54533	0	0	0	0	0	0	0	0	0	0	3.79876	0	0	0	14.9332	23.6029	0	0	0	0	4.26986	5.06159
	0	0	0	0	0	0	0	0	0	0		0	0.785218	2.34274	0.785078	0	0	0.730539	0	0	0	1.70545	0	0	0	0	0	2.24071	0	0	0	34.0748	0	0	0	0	0	0	0	0	3.23493
	0	1.14025	3.55258	0	0	0	0	0	0	0		0	0	0	0	0	0	2.21549	0	2.45961	0	0	0	0	0	0	2.81335	0	24.2753	2.86226	0	0	0	0	0	0	0	0	0	0	11.4356
	0	0	0.917172	0.42518	0	0	0	0	0.43121	0		0	0	0	0.788209	0	0	0	0	1.64905	0	0	0	6.61202	33.6604	0	0	0	0	0	0	0	1.89422	0	0	0.869938	0	0	0	1.90253	5.46855
	0	0.993184	0	0	0	0	0	0	0	0		0	0	3.20586	0	0	0	0	0	2.75185	1.78563	0	0	2.70838	0	0	22.5593	0	0	0	0	0	0	0	1.02695	0	0	0	0	0	0
	0	0	0	0.518803	0	0	0	0	0	0		0	0	0.998824	0	0	0	0	1.21668	0	0	0	0	0	1.51225	0	5.31403	0	0	0	9.42115	0	0	0	6.37673	2.11521	0	0	0	0	0
	0	4.23964	0	0	0	0	0	0	0	2.56818		0	0	0.889484	0	0	0	0	0.345895	0.342449	0	5.2722	0	0	0	0	0	0	12.084	1.46617	0	0	19.4325	30.9182	0	0	0	0	0	0	0
	0	1.44049	2.53726	0	0	0	1.1906	1.1906	0	1.36593		1.13739	1.09664	1.26161	0	0	0	0	0	1.07293	0	8.432	0	0	0	0	0	0	0	0	0
	0	0	0	0	0	0	0	0	1.37936	0		0	0	0	0	0	0	0.762355	0	0	0	9.39039	0	0	0	0	0	0	0	0	0	0	0	0	0	0	0.907965	0	0	0	0.960158
	1.1369	2.1818	0	0	0	1.12938	0	0	0	0		0	6.30903	0	0	0	0	0	0	0	0	24.7461	0	0	0	0	0	2.0037	0	0	0	1.06928	0	3.34106	1.37679	0	0	0	0	0	0
	0	3.60363	1.00072	0	0	0	0	0	0	0		0	7.84403	0	0	0	0	2.23088	0	6.68995	0	0	0	0	1.05787	1.02704	0	0	0	1.15224	0	0	1.47717	1.18905	0	0	0	0	0	2.29419	0
	1.02679	2.25653	1.10422	0	0	0	0	0	0	0		0	1.03748	0	0.968307	0	0	0	0	0	0	0	0	0	0	0	0	0	1.98453	0	0	0	1.38672	0	0	0	0	1.32199	0	0	2.7202
	0	12.1766	0	0	0	0	0	0	0	0		0	0	0.565311	0	0	0	0	0	0	0	0	0	0	2.30916	0	0	0	0	0	0	0	3.98456	0	0	0	0	0	0	0	0
	0	0.33831	0	0	0	0.336077	0	0	0	0		0	0	0	0	0	2.48124	0	0	1.08707	0	7.29791	0	0	0	0	0	0	0	0	0	0	0	1.33256	0.903347	0	0	0	0.870367	0	0
	1.10938	0	0	0	1.04245	0	0	1.07271	0	0		4.64485	0	0	0	0	0	0	0	2.32483	0	0	0	0	0	0	1.00382	1.94068	0	0	0	0	0	2.69849	0	0	0	0	6.5426	0	0
	0	0	0	0	0	0	0	0	0	0		1.93697	0	0.959571	0	0	0	0	0	5.44002	0	0	0	0	0	0	0	0	1.07305	0	0	0	0	1.50028	0	0	0	0	6.59237	0	0
	0.322125	0	0.877609	0	0.354516	0	0.31774	0	0	0		0	0	0	0	0	0	0	0	0.395005	0	0	0	0	0	0	0	0	0	0	0	0	0	0	0.884429	0	0	1.16977	0	0	0
	5.23992	1.30616	0	0	0	0	0	4.78807	0	0		0	0	0	0	0	0	0	0	0	0	0	0	0	0	0	0	0	0.985354	0	0	0	0	0	0	0	0	0.977974	1.95436	1.16446	0
	0	0	0	0	0	0	0	2.17786	1.03802	0		0	0	0	0	0	1.16146	0	0	1.30687	0	0	0	1.14915	0	1.04583	0	0	0	0	0	1.10705	0	0	0	0	0	0	0	0	0
	0	0.463114	0.668715	0	0	0	1.00068	0	0	0		0	0	0	0	0	0	0	0.961375	0.886246	0.968924	0	0	0	0.97643	0	0	1.02926	0	0	0	0	0	0	0	5.36572	0	0	0	0	0
	0	0	0.974192	0	0	0	0	0.947986	0	0		0	0	0	0	0	0	0	0	0	21.9038	0	1.25164	0	0	0	0	0	0	0	0	0	0	0	0	14.8931	0	0	0	0	0
	0	3.04988	0	0	0	0	0	1.14176	0	0		0	0	0	0	0	0	0	0	0	0.284307	0	0	0	0	0	0	0	0	5.00408	0	0	0	0	0	8.11397	0	0	7.19124	0	0.952673
	0	0	0	0	0	2.36626	0	0	0	0		1.51703	0	0	0	0	0	0	0	0	0	13.3222	1.85815	0	0	0	0	0	0	0	0	0	0	0	0	0	0	10.018	0	0	0
	0	0	0	0	0	0	0	0	1.58351	0		0	0	0	0	0	0	0	0.375456	0	0.339407	2.55533	0	0	0	1.31074	0	0	0	0	0	1.09641	1.09163	1.19894	0	1.25191	0	0	0	0	0
	0	0	0	0	0	3.08664	1.43097	1.30756	0	0		0	0	1.54174	0	0	0	0	0	5.14051	27.9311	9.28753	0	0	0	0	0	0	0	0	0	0	0	0	0	0.719557	0	0	0	0	0.54626
	0	0	0	0	0	4.13807	0	0	0	0		0	0	0	0	0	0	0	0	0	4.10664	0	0	0	0	0.641235	0	0	0	0	0	0	0	0	0.863532	1.72788	0	0	0	0.849576	0
	0	0	0.251071	0	0	0	0	0	0	0		0	0	0	0	0	0	0	0	4.02801	4.59338	0	0	0.714288	0	0	0	0	0	0.631385	0	0	0	0	1.2419	0	0	1.3421	1.1606	0	0
	0	0	0	0	6.15367	0	0	0	0	0		0	0	0	0	0	0	0	0	7.04055	0	0	0	0	0.977028	0	0	0	0	2.17964	0	0	1.83016	0	0	0	0	0	0	0	0
	0	0.680929	0	0	0	0	0	0	1.78408	0		0	0.90773	0	0	0	0	0	0	0	0	0	0	0	0	0	7.3028	0	0	0	0	0	4.33156	0	0	0	0	0	0	3.35309	0
	0	0	1.05676	0	0.979803	0	0.974695	0	0	0		1.29763	0.743985	0.6354	0	0	0	0	0	0	0	7.62484	0	0	0	0	0	0	0	0	0	0	2.5124	0	0	1.16291	0	0	0	7.93511	0
	0	0	3.76416	12.9247	0	0	0	0	0	0		1.40928	0	0	3.59284	0	0	1.49931	0	0	0	13.0254	0	0	0	0	0	0	0	0	0	0	1.17991	0	0	0	0	1.31022	0	0	0
	0	0	0	0.901556	0.823072	0	0	0	0	0.426905		0	0	0	0	0.503301	0	0	0	0.544724	0	0	0	0	0	0	0	0	0	0	0	0	0	0	0	0	0	1.46729	0.917173	0.785595	0
	0	0.660372	0	0	0	0	0	0	0	0		0	0	0	0	0	0	0	0	2.18627	0	0	0	0	0	0	0	0	0	0	0	0	0	0	0	0	0	0	3.58295	0	0
	0	0	0	0	0	0	0	0	0	24.6637		0	0	0	0	0	0	0.48699	0	0	0	0	0	0	0	0	0	0	0	0	0	0	0	0	0	0	0	0	0.557909	0	0
	0	0	0	0	0	0	0	0	0	23.5674		0	0	0	0	0	0	0	0.842525	0	0	0	0	0	0	0	0	0	0	1.17407	0	1.03628	0	0	0	1.08451	0	1.10814	0	0	0
	0	0	0	0	0	0.620764	0	0	0.617456	0		0	0	0	0	0	0	0.547769	0	0	0	0	0	0	1.45316	0	0	0	0	0	0	0	0	0	0	0	0	0	1.09408	0	0
	0.955982	0	0	0	0	1.03716	0.971725	0	0	0		0	0	0	0	0	0	1.16281	0	1.05175	0	0	0	0	1.28812	0.592105	0	0	0	0	0	0	0	6.46497	0	0	0	1.72192	0	0	0
	0.6485	0	0.663362	0	0	0	0	0	0.595479	0		0.961044	0.994429	0	0	1.00312	0	0	1.7583	0	1.22372	0	0	0	0.843346	0.749736	0	0.745212	0	0	0	0	0	0.906043	0.90515	0	0	0	0	0	0
	0	0	0	0	1.65949	0	0	0	0	0		2.62423	1.08921	2.388	0	0	0	0	0	0	0	0	0	0	0	0	0	0	0	0.934458	0	0	0	0	0	0	0	0	0	9.54526	0
	0	0	11.6203	0	0	0	0	0.939004	0	0		0	0	0	0	0	0	0.834894	0	1.72558	1.90845	0	0	0	1.00211	0	0	0	0	0	0	4.35788	1.46728	0	0	0	0	0	0	0	0
	0	2.92555	0	0.660202	0	0	0	0	0	0		0	0	0	0	1.8118	1.21262	0	0	0.697169	0	0	0	0	1.40216	0	1.38321	0	0	0	0	0	0	0.596574	0	0	0	2.45779	0	0	0
	1.00688	0	0	0	0	0	0	0	0	1.09991		0	0	0	0	0	0	7.16319	0.486386	0	0.50043	0	0	0.86597	0	0	0	0	0	0	0	0	0	0	0.740451	0.702534	0	0	0	0	0
	0	1.77165	0	4.05993	0	0	1.63869	0	0	1.4942		0	0.69084	0.771338	0	0	0	0	0	0	0	1.85479	0	0	0	0	0	0	0	0	0	0.471892	0	0	0	0	0	0	0	1.32472	0
	0	0	0	0.657164	0	0	0	0.702905	0.642994	0		0	1.04835	0	0	0	0	0	0	0	0	1.48911	0	0	0	0.697307	0	0	0	0	0	0	0	0.603097	0.611312	0	0	0	2.73119	0	0
	0	1.36838	4.71648	0	0	0	5.89746	0	0	0		0	2.18251	0.967012	0	0	0	0	0	0	0	0	0	0	1.67353	0	1.8028	0	0	0.897226	0	0	0	0	0	0	0	0	0	0	0
	0	0	0	0	0	0	0	0	0	0.647278		0	0	0	0	0	0	0.985791	0	0.958758	0	30.2833	0	0	0	0	0	0	0	0	0	1.14096	0	0	0	0	0	2.24254	0	0	0
	1.19504	0	0	0	0	0	0	0	0	0		0	0	0	0	0	0.82724	0	0.918973	0	0	0.325061	0	0	0	0	0.704429	0	0	0.34713	0	0	0	0	0	0	0	0	3.98729	0.903929	0
	0	0	0	1.44564	0	0	0	0	0	0		0	0	0	0	0	1.11525	0	0.869262	0	0	0	0	2.32801	0	0	0	1.12958	1.13227	2.59598	0	0	0	1.24217	0	0	0	0	2.19629	1.21928	0
	0	1.79562	0	0	0	0	0	1.66703	3.14244	0		1.30103	0	0	0	0	0	2.05765	0	1.43391	0	4.34146	0	0	0	1.12438	0	0	0	0	0	0.824439	0	0	0	0	0.763845	0.756129	0	0	0
	0	1.19591	1.91329	0	0	0	0	0	0	0		0	0	0	0	0	0	1.15313	2.53988	3.8851	0	29.7349	0	0	0	0	0	0	0	0	0	0	0	0	0	0	0	0	2.54466	0	0
	0	0.613662	0	0	0	0	0	0	0	0		0	0	0	1.01042	0	0	0	0	0	0	11.4211	0	0	0	0	0	0	0	0	0	0.816508	0.857965	0	0	0	0	0	0	0	0
	0	0	1.06704	0	0.757451	0	0	0	0	0		0	0	1.1561	1.26534	0	0	0	0	1.49276	1.30722	0	0	0	0	0	0	0	0	0	0	0	0	0	0	0	0	3.66847	0	0	0
	0.715857	0	0	0	0	0	0	0	0	0		0.950518	0	0	0	0	0.944159	0	0	0	0	0	0	0	0	0	0	0	0	0.789797	0	0	0	0	0	0	0	11.3867	0	27.5518	0
	0	0	0	0	0	0	5.83365	2.10285	0	0		0	0	0	0	0	0	0	1.25312	0	0	7.85714	0	0	0	0	0	0	0	0	0	0	0	0	0.643975	0	7.31688	1.45708	0	0	0
	0.9222	0	0	0	0	0	0	0	2.10368	0		0	0	0.790241	0	0	0	0	0	0	0	26.6372	0	0	0	0	0	0	0	0	2.17368	0	0	0	0	0	0.659165	0	0	0	0
	0	0	0	0	0	0	0	0	0	0		0	0	0	3.04796	0	0	0	0	0	1.37955	6.46438	0	0	0	0	0	0	0	0	0	0	0	0	3.39274	0	0	0.847848	0	3.08722	0
	0	0	0	0	0	0.905239	0	0	0	0		0	0	0	0	0	0	0	0	0	0	0	0	0	0	0	0	0	3.57455	0	0	0	0	0	0	0	0.831117	6.90552	0	0	0
	0	0	0	0	0	0	0	0	0	0		0	0.638839	0.592258	0	0	0	0	1.12121	0	0	0	0	0	0	3.3994	1.82964	0	0	3.75143	0	0	0	0	0	0	0	0	0	0	0
	0	0.980196	1.07978	1.81058	0	0	0	0	0	0		0	1.86404	0	0	0	0	0	0	1.92003	0	0	0	0	0	0	0	0	0	2.69146	0	0	0	0	0	0	6.68377	0	0	0	0
	1.13729	0	0	0	0	1.12139	0	0	1.24453	0		0	0	0	0	0	0	0	0	0	0	4.02218	0	0	0	0	0	0	0	0	0	0	3.23578	0	0	0	0	0	3.80515	0	0
	0	0	0	0	0	0	31.0934	0	0	0		0	0.979411	0	0	0	4.45753	0	0	0	0	0	0	0	0.993589	0	0	0	0	0	0	0	0	0	4.42631	0	0	0	0	0	0
	0	0	0.5905	1.17219	0	6.5343	0	0	0	0		0	0	0	0	0	3.1146	0	0	0	0	0	0	1.14284	0	0	0	1.19585	0	0	0	0	0	0	0	0	0	0	0	0	0.824112
	0	0	0	0	0	0	0	0.332747	0.369155	0		0	0	0	0	0	6.2233	0	0	0	0	51.0568	0	0	0	0	0	0	0	0	0
	0	0	0	0.898117	0	0	0	0	0.849532	0		6.07007	0	0	0	0	0	0	7.24094	0	10.817	24.9716	0	0	0	0	0	0	0	0	0
	0.932071	0	1.01882	0	0.956572	0	0	0	0	0		0	0	0	0	0	0	0	18.4521	0	0	7.76941	11.4492	0	0	0	0	0	0	0	0
	0	0	0	0	0	0	0	0	0	0		0	0	0	0	0	0	0	0	2.52438	9.00424
	0	0	0	0	2.51181	0	0	0	0	0		0	0	0	0	0	0	0	0	0	19.7647
	0	0	0	0	0	0	0	0	0	0		0	0	0	0	0	0.889538	0.885311	0	0	0
	0	0	0	0	0	0	0.781629	0	0	0		0.858872	0.888102	0	0	0	0	0	0	0.902372	0
	0	1.19562	0	0	0	0	0	0	1.26008	0		0	0	0	0	0	0	0	0	0	4.43078
	0	0	0	0	0	0	0	2.12728	0	0		0	0	0	0	0	0	0	0	0	27.0664
	0	1.0394	0	0	0	0	0	0	0	0		0	0	0	3.84556	2.94414	0	0	0	0	0
	0	0	0	0	0	0	0	0	0.882685	0		0	0	0	6.90364	2.80887	0	0	0	0	0
	0.660764	0	0	0	0	0	0	0	0	0.607314		0	0	0	2.43425	0.58089	0	0	0	0	0
	0	0.835522	0	0	0	0	0	0	0	0		0	0.762412	0	0	0	0	0	1.20615	0	0
	0	0	0	0	0	0	0	0.785195	0.711552	0		0	0	5.40229	0	1.09399	0	0	0	0	0
	0	2.14914	0	1.10442	0	0	0	0	0	0		1.04204	0	0	1.18314	0	0	1.17727	0	1.20675	0
	0	0	0	0	0	0.901558	0	0	1.01702	0		0	0	0	0	0	0	0	0	0	0
	0.964362	0	0	0	0	0	0	1.02936	0	0		0	0	0	0.799237	0	0.995625	0	0	0	0
	0	6.22736	0	0	0	1.00104	0	0	1.16651	0		0	0	0	0.513678	0	0	0	1.08505	0.511621	0
	0	0	0	0	0	0	0	0.899835	0	0		0	0	0	0	0	0.893175	0	0	0	0
	0	1.17022	0	0	0	0	0	1.03672	0	0		0	0	2.68225	0	0	0	0	0	0	1.95537
	0	0	0	0	0	0	0	0	0.395614	0		0	0	0	0	0	0	0	0	0	0
	2.03166	1.07791	0	0	0	0	0	0	1.13911	0		0	0	0	0	0	0	0	0	0	0
	0	0	0	1.53807	0	0	2.47393	0	0	0		0	0	0	0	0	0	0	0	3.05253	0
	0.281239	0	0	0	0	0	0	0	0	0		0	0	0	0	0	0	0	0.379005	0	0.69688
	0.956691	0	0	1.1742	0	0	0	0	0	0		0	0	0	0	10.1221	1.50644	0	0	0	0
	0	0	0	0	0	1.92307	0	0	0	0		0	0	0	0	0	3.29738	3.56868	4.89081	7.91901	0
	0	0	0	1.97447	0	0	0.828671	0	0	0		0.785974	0	0.788812	0	0	0	0.837128	0	0	0
	0	0	0	0	0	0	2.56373	2.16676	0	0		0.449944	0	0	0	0	0	0	0	0	0
	0	0	0	0	1.31194	2.60629	0	0	0	0		0.891757	0	0	0	0	0	0	0	0	0
	0	0	0	0	0.632789	0	0	0	0	0.537144		0	0	0	0	0	0	1.01827	0	0	0
	0	0	0	0	0	0	0	0	0	0.535636		0.410661	0	0	0	0	0	0	0	1.25438	0
	0	0	0	0	0	7.03987	0	0.910836	0.93933	0		0	0	0	0	1.05773	0	0.972841	0	0	0
	0	0	0	2.57211	0	0	0	0	0	0		1.33519	0	0	0	0	0	1.13423	0	0	0
	3.2299	0	0	0	0	0	0	0.972009	0	0		0.710797	0	0	0	0	0	0	0	0	0
	0	0.787867	0	0	0	0	0	0	0.689686	0.741188		0	0	0	0	0	0	5.3625	14.4919	0	0
	0	0	0	0	0	0	0	0	1.01825	0		0	0	0	0	0	0	1.89005	0	0	0
	0	0	0	0	0.993173	0	0	0	0	1.15997		0	0	0	0	0	0	0	0	0	0
	0	0	0	0	0	1.44194	0	0	1.61968	0		0	1.66016	0	0	1.40912	0	0	0	0	0
	0	0	0	0	0	0	0	0	0	0		0	1.30994	0	0	0	0	0	0.941257	0	0
	0	0	0	0	0	0	0.598806	0	0	0		0	0	0	0	0	0	0	0	0	0
	0	0	0	0	0	0	0	0.501489	1.61197	0		0	0	10.9865	0	0	0	0	0	0	0
	0	0	0	0	0	0	0	0	0	0.653007		0	0	0	0	0	0	0.340027	0	0	0
	0	0	0	0	0	0	3.988	0	0	0		0	0	0	0.670943	1.29981	0	0	0	0	0
	0	0	0	0	0	2.11146	0	2.06987	0.698781	0		0	0	0	0	0	0	0	0	0	0
	1.20626	4.10857	0	0	0	0	0	0	0	0		0	0	0	0	0	2.25028	0	3.52339	0	0
	1.26286	0	0	0	0	0	0	0	0	0		0.751304	0	0	0	0	0.645625	0	0	0	0
	0	0	0	0	0	0	0.878944	0	0	3.9924		0	0	0	0.491951	0	0	1.07946	0.488646	0	0
												0	0	0	0	0.983663	0	0.993921	0	0	0
												0	0.931369	0	0	0	0	0	0	0	0
												1.20979	0	0	0.877755	0	0	0	0	0	0
												0.352574	0	0	0	0	0	0	0	0.33512	0
												0	0	0	0.786313	0	1.39816	0	0.711296	0	0
												0	0	0	0	0	0	1.3528	9.03444	0	0
												0	0	0	0	0	0	0	0	0	9.3796
												4.46307	0	0	0	0	0	0	0	0	0
												0.953813	0	0	0	0	0	0	2.06557	2.25507	0
												0	0	0	0	2.12183	0	0	0	0.993023	0
												0	0	0	0	12.0889	0	0	1.17869	0	0
												0	0	1.32382	0	1.06252	1.17648	0	0	0	0
												0	0	0	0	2.4528	0	0	0	3.05083	0
												1.30581	0	0	0	0	0.682443	0	0	0	0
												0	0	0	0	0	0	0	0	0	0
												0	0	0	1.94884	0	0	0	1.95161	0	0
												7.76941	11.4492	0	0	0	0	0	0	0	0

## Sheet: Figure 3I-Process Area
	Process Area (% Change Baseline)
	Mouse 1	Mouse 2	Mouse 3	Mouse 4	Mouse 5
Baseline	0	0	0	0	0
0-10	8.71	16.24	6.98	2.87	4.8
10-20	12.59	21.33	9.23	6.32	9.45
20-30	15.87	21.62	11.64	7.8	11.74

## Sheet: Figure 3J-Motility and Calcium
	Stable	Ext./Outgr.	Retraction
	42.1061	66.2446	2.77114
	12.0783	89.4053	29.4376
	15.8698	11.8053	10.0955
	10.6679	1.61916	25.2117
	0.877528	299.827	4.4115
	6.19519	47.6603	6.96576
	1.04136	20.2255	2.27459
	0.669296	13.3301	42.1355
	0.643469	5.05499	4.53613
	0	0.936028	3.17831
	12.9212	3.41093	0.52917
	25.652	0	1.80493
	10.4526	5.3174	7.14587
	7.06238	95.0122	2.24254
	41.1523	98.5064	19.811
	19.43	69.2826	7.44157
	8.75031	101.304	1.1325
	14.1044	141.804	2.29353
	4.2704	36.7174	1.30398
	2.51951	18.5814	1.54735
	17.2922	25.199	8.45677
	9.53866	86.8934	13.5668
	7.63839	16.5623	2.5816
	8.8328	30.215	33.5494
	0.888164	30.1653	0
	2.19058	1.08482	7.03968
	7.28731	0	1.64512
	4.77445	14.477	2.41467
	48.7644	3.90926	5.29757
	0.530403	0.820443	2.71071
	1.83038	2.36929	2.89741
	1.17503	1.75299	21.136
	2.41337	50.3172	0.80665
	3.14987	38.3804	7.4808
	0	106.661	0
	23.7987	9.85899	8.43241
	1.41383	5.67534	4.06609
	1.7703	171.421	18.1631
	6.52423	13.2525	6.51329
	16.5924	4.29371	13.1236
	16.9714	0	6.50299
	5.28099	4.63957	0.548831
	17.1518	4.91888	5.04686
	0	19.2743	3.18257
	0.506453	42.1819	2.55278
	1.60464	4.05947	1.35755
	0	9.73479	5.07175
	1.92847	11.4084	2.46526
	1.28058	6.81897	0
	3.05564	65.8701	41.8323
	1.89773	123.322	0
	3.63058	0	1.18454
	1.86907	142.901	0.898341
	6.89192	7.72714	2.50077
	1.44956	0	1.26176
	0.598796	214.924	5.79399
	1.69821	0	1.22004
	2.41381	0	1.17811
	2.75543	22.4426	0
	2.23774	0	19.344
	1.67715	14.6718	1.42628
	2.79415	41.0118	2.5719
	3.41611	8.08137	1.50215
	2.54075	4.89263	4.42225
	2.89045	2.69013	7.91221
	2.35764	5.62175	26.9883
	1.37048	0	0.747622
	4.04875	25.515	1.84101
	9.59112	5.9637	6.92605
	3.75814		19.7897
	3.47736		0.949118
	5.25496
	4.7204
	0
	2.74604
	3.1881
	4.38722
	3.18765
	2.49314
	2.33506
	7.93013
	7.5702
	9.00346
	9.86312
	9.69688
	13.9347
	2.58572
	0
	14.2679
	16.9097
	18.1695
