# Supplementary material for: Microglial calcium signaling is attuned to neuronal activity in awake mice
Source: eLife. 2020 Jul 27;9:e56502. doi: 10.7554/eLife.56502 (PMC7402678; doi:10.7554/eLife.56502)
Supplement: Figure 4—source data 1. [file elife-56502-fig4-data1.xlsx]

## Sheet: Figure 4C-Neuronal Calcium
	Layer II/III neuronal somata calcium signal area
	Baseline	Kainate (15-30 min)	Kainate (after 1st Seizure)
	3.40796	2313.27	540.137
	0.78541	1159.66	240.482
	5.19354	775.103	270.625
	13.0495	321.68	92.9739
	6.49479	619.99	192.41
	2.18308	360.059	195.065
	0	565.894	231.543
	4.32447	244.425	144.857
	1.06003	444.227	153.798
	31.5139	311.408	86.5712
	4.36346	426.614	126.942
	0	549.682	218.089
	14.2295	595.74	188.658
	0	169.608	132.316
	3.00799	274.603	137.922
	3.67743	266.262	87.7873
	1.98279	669.172	190.075
	1.32901	466.908	193.807
	2.77628	509.276	157.617
	0.895386	667.032	116.05
	1.14328	677.359	159.573
	0	574.287	178.803
	3.36942	339.178	208.755
	9.37527	632.767	126.201
	4.03863	613.594	325.753
	2.78927	343.042	97.6707
	3.78109	738.152	232.751
	0	329.002	339.521
	2.31387	602.06	233.599
	2.90623	631.548	280.186
	3.92919	1216.94	583.158
	1.42778	686.726	233.85
	3.11747	974.567	470
	1.02539	1199.59	489.881
	0.786536	699.459	250.374
	0.858795	1169.79	292.646
	2.20589	1189.73	317.399
	10.4434	947.97	263.657
	1.14234	796.545	249.948
	0	1169.74	263.107
	0	909.211	259.052
	2.11439	1020.87	262.234
	7.57528	1277.65	462.629
	0	1378.04	394.337
	3.45007	1318.01	268.607
	1.17349	1207.68	381.885
	9.17368	1367.08	336.131
	4.55815	1313.28	298.609
	3.69792	1296.1	335.584
	1.68361	1031.74	218.488
	6.47885	1028.94	274.772
	3.40187	600.885	160.979
	7.83908	568.785	265.173
	12.4721	563.875	231.629
	3.90167	933.252	250.327
	1.41885	731.353	180.793
	4.16695	917.349	277.388
	3.98109	525.988	151.176
	14.8906	271.701	138.577
	2.93875	241.052	153.053
	6.74681	468.967	219.461
	1.25645	416.659	150.441
	1.83671	349.939	210.213
	1.26636	402.07	104.553
	1.05374	343.889	107.376
	1.84701	502.749	146.406
	1.89082	673.243	186.931
	2.62028	617.603	104.878
	3.83009	680.044	227.042
	2.78581	515.867	262.341
	7.29535	586.157	172.705
	15.7991	646.721	272.042
	6.03524	583.501	196.044
	2.34728	580.976	240.901
	1.21792	724.356	247.542
	0.66037	440.508	243.935
	1.83621	308.892	181.873
	6.83093	233.158	129.27
	2.1681	478.227	158.955
	7.5826	594.013	234.243
	1.57339	459.473	167.65
	0.795969	277.513	98.7408
	15.4454	821.842	294.009
	35.1188	507.851	820.059
	27.3144	677.143	682.061
	13.2978	681.59	746.095
	16.5674	679.348	809.986
	23.2386	523.87	818.255
	3.90572	722.77	997.347
	3.95983	379.287	903.259
	19.6237	414.925	948.132
	7.07716	439.912	1043.05
	3.39461	509.978	1097.71
	7.28968	472.343	1014.11
	3.90395	654.27	1001.16
	7.04631	388.241	904.433
	32.6069	800.264	908.476
	16.0342	644.606	816.514
	13.7042	537.21	863.498
	6.7466	431.402	984.592
	1.94792	439.444	1069.27
	4.47118	368.731	960.216
	35.5482	298.753	1054.74
	2.08876	326.255	920.727
	19.1167	630.342	909.649
	9.43975	369.632	640.494
	2.83063	673.367	710.61
	6.51671	640.098	759.924
	10.3621	1092.65	909.969
	3.86465	865.159	1112.97
	11.2111	433.183	1063.31
	13.2324	651.977	958.62
	14.389	445.705	1125.3
	20.3923	557.963	1244.95
	9.70238	388.891	850.901
	5.09819	94.6351	665.212
	21.8285	243.553	754.292
	9.54928	205.218	1025.11
	9.70091	323.949	1184.93
	7.26148	277.382	982.477
	7.78861	407.684	1173.65
	24.6255	530.231	827.794
	11.7737	172.516	643.191
	30.6658	158.5	826.543
	6.22384	298.247	867.602
	47.3674	405.791	778.311
	2.53934	494.64	733.024
	9.59978	230.33	857.267
	1.01424	175.196	739.713
	0	188.712	939.297
	4.48238	221.716	971.465
	19.2159	196.615	981.048
	2.95988	185.591	930.685
	6.76235	301.023	865.457
	22.0202	157.877	763.06
	2.88445	209.935	860.34
	1.76055	280.696	842.177
	4.73295	244.25	717.185
	26.0363	150.83	715.828
	15.59	168.356	736.977
	9.05691	296.025	646.016
	7.95423	143.661	600.281
	6.40893	187.62	777.151
	7.04222	215.04	736.64
	16.3578	262.032	780.441
	4.83889	94.6316	773.073
	4.45688	216.51	627.948
	14.3621	181.811	728.99
	3.72035	218.738	710.044
	12.6827	256.003	609.639
	33.8692	285.839	593.521
	3.16975	277.018	718.474
	10.8107	216.889	683.153
	12.1589	237.798	707.79
	9.3906	184.907	709.832
	6.62822	95.6985	609.231
	5.95391	121.944	645.323
	3.86429	118.36	679.974
	2.18539	148.973	720.411
	2.19866	126.674	653.299
	9.65183	94.1453	643.514
	2.3776	162.155	646.835
	25.6994	547.449	841.948
	6.13638	196.438	789.974
	1.93641	455.262	1120.3
	11.6122	636.968	968.803
	7.32829	559.769	872.79
	21.4546	511.126	807.581
	17.3348	642.143	972.66
	6.93557	443.91	701.896
	13.5562	371.599	1167.77
	17.6732	387.879	1133.56
	6.90293	1133.28	673.899
	48.107	22.158	18.8826
	4.54221	29.8598	71.7228
	7.43593	123.308	67.3244
	19.0332	38.0708	24.9683
	6.86039	61.2202	33.3634
	7.77954	77.7548	53.3815
	8.34627	72.0811	49.0939
	1.00688	64.6245	52.2463
	2.68221	71.5102	75.3144
	7.49501	78.9081	70.4774
	7.03972	71.4748	63.8149
	2.08063	63.7293	90.6219
	4.2555	49.1601	60.2869
	7.9207	58.2343	68.4577
	8.88206	67.13	46.422
	4.53721	48.3003	60.4431
	4.19532	63.5559	57.8506
	4.30299	39.4552	77.9957
	4.38434	55.6844	40.5449
	3.23748	43.1775	67.1938
	4.22306	56.1693	51.4198
	4.96893	72.7803	71.3483
	5.66696	61.6455	72.6535
	5.17648	26.6859	41.4497
	8.42221	50.0837	47.2066
	9.19126	88.2643	46.0734
	22.0925	56.6039	63.5428
	4.97716	100.799	69.3505
	3.05224	56.4195	69.4284
	8.40959	417.362	325.103
	6.07882	36.3788	71.625
	9.73773	60.1222	80.3569
	3.75609	59.7639	54.997
	9.53912	64.1628	46.2501
	5.22234	35.4372	67.9602
	8.41953	18.6472	46.8119
	11.3195	55.8995	70.7432
	3.39445	113.591	88.7817
	3.12813	47.1903	51.6603
	4.73029	25.2366	48.0249
	8.02525	58.2965	59.6205
	3.36827	71.8483	76.9464
	3.60989	53.8512	44.1346
	7.4047	72.491	64.2957
	5.3362	41.6255	41.4576
	5.57201	87.2479	85.3895
	10.7644	86.2841	91.3025
	8.67237	72.189	50.0134
	10.6495	72.2206	23.8327
	3.39066	63.8161	67.81

## Sheet: Figure 4F-Microglial Calcium
	Somata			Processes
	Baseline	Kainate		Baseline	Kainate
1	0	1.74837		0.941013	11.2447
2	0.411681	0		4.12965	12.2772
3	25.5457	15.1855		1.21553	6.90822
4	1.79203	3.66686		1.49033	15.6534
5	0.424174	6.34602		1.34283	4.45748
6	6.41491	1.68428		1.8792	2.2727
7	0.525501	4.76321		1.07831	19.84
8	22.5533	5.20728		1.47698	6.39675
9	2.61797	8.81911		0	1.42395
10	0	0		3.93015	8.21425
11	0	0		0.781472	13.8154
12	15.2982	4.38538		0.815261	9.35797
13	0	1.70219		1.41713	14.1865
14	0	9.19148		16.6149	9.02568
15	25.6638	25.4013		2.57604	5.02758
16	0	0		0	3.43725
17	1.45132	0		9.47024	1.50054
18	0.607424	0.767959		1.85202	9.9658
19	7.95991	0.441097		0	14.0192
20	0	0		4.35678	9.45552
21	15.5421	0		8.93597	9.68632
22	1.18002	0		7.34381	5.55368
23	0	0		1.46711	7.07472
24	1.11555	1.24911		11.7684	2.98806
25	0	0.361783		0.49778	35.3136
26	0	8.34998		0	10.9884
27	0.675187	6.97367		2.8276	7.99629
28	17.4088	0.849847		0	1.9849
29	0	0		3.82508	10.8034
30	1.64583	3.78764		3.02715	2.61007
31	0	0		0.986093	7.2718
32	2.31233	6.1956		0.973844	11.8416
33	5.18265	1.57808		2.45049	4.88238
34	10.146	1.73683		15.6737	7.45411
35	4.73877	0		20.2247	9.49434
36	0.95288	23.5149		2.11634	3.26058
37	0.590333	0.764227		2.10277	7.36736
38	3.27359	6.67045		2.06706	6.79566
39	3.16556	0.410141		3.32786	1.45867
40	1.02588	0		0	45.3804
41	0.400329	3.1352		0	1.80448
42	1.1018	0.591783		1.57342	25.2699
43	0	5.23582		2.34682	8.74967
44	1.87323	13.5699		2.71231	2.32179
45	7.61047	1.39668		3.24928	7.02442
46	1.39216	11.6774		0.681461	18.5077
47	1.47548	9.25353		3.73434	4.40536
48	0	7.41648		0.963825	4.02388
49	4.36696	1.90417		0.387564	24.1477
50	0.732232	2.52035		5.49979	3.4156
51	0.648416	6.77988		0	3.65446
52	4.64593	10.3298		6.31034	12.9695
53	2.45158	3.94838		3.41382	5.60802
54	12.908	1.00577		0	16.7868
55	13.017	14.4527		10.922	8.46239
56	0	19.4437		0	0.450273
57	2.95704	5.48099		1.01455	5.79934
58	10.1297	27.5816		0	10.1688
59	5.28111	7.13675		2.09521	4.57737
60	1.61176	0.96341		0	59.069
61	1.35711	7.59161		0	11.3119
62	2.33167	1.45617		1.82989	9.45265
63	0.699895	1.92552		8.29892	7.01554
64	0	20.4893		1.03975	17.6877
65	4.49848	2.57779		3.07209	8.46915
66	0.533747	4.0715		1.43118	8.94103
67	0.458476	3.13774		1.99424	3.28749
68	3.25177	1.20788		2.30381	4.67995
69	10.2678	6.55253		1.40943	22.5215
70	13.5976	4.19261		0	1.40649
71	1.7125	2.67975		0	4.60127
72	1.11458	5.87301		1.33711	0.615572
73	5.67209	22.9428		0.439295	1.70719
74	5.21022	6.03697		4.43425	16.2387
75	0.403691	3.42636		0	3.95683
76	0	4.10495		1.57317	0.43155
77	1.77278	2.05722		0.538221	22.4249
78	3.33344	8.21672		0	10.4989
79	0.525832	0.770933		0.736913	0
80	0	10.1725		0.450319	11.2798
81	8.65869	3.30342		3.53539	46.0265
82	0	14.7433		0.959965	4.26669
83	19.9432	6.02794		0	3.00185
84	0.469657	1.96072		0	6.12843
85	1.34195	1.45042		0.620505	5.10438
86	4.30606	0.47717		2.09587	5.91043
87	7.40549	21.5821		1.81338	51.2492
88	0	1.63317		1.86058	15.6242
89	0.385377	3.55283		3.61203	1.27373
90	0.554724	1.08132		12.3083	13.1682
91	5.01583	9.2219		2.57132	21.617
92	1.96903	7.98192		3.02925	6.60715
93	7.82048	14.9713		4.10473	2.10417
94	18.5058	6.76451		11.7003	137.476
95	1.24546	8.00897		3.06245	5.22464
96	0.662048	18.5271		1.14941	28.8797
97	1.10022	18.5188		15.294	4.94595
98	2.0066	2.09172		2.0779	24.2448
99	1.07779	1.10615		15.7543	9.49468
100	5.41627	8.97418		4.24824	32.4094
101	6.70294	17.367		5.41806	14.7588
102	12.562	11.275		8.30134	23.9367
103	2.22116	0		4.57694	7.69842
104	15.7658	29.0347		1.99789	9.18634
105	10.0081	4.13117		0.572438	10.0171
106	16.2795	25.9716		4.56295	9.51509
107	3.7533	2.83569		2.01619	19.1352
108	23.2607	6.67891		6.8186	23.5387
109	0.904602	80.2487		20.2252	14.9423
110	1.72875	0		3.33742	14.2938
111	3.8214	1.65136		4.7479	15.989
112	1.77531	5.62793		1.59281	26.0813
113	9.91976	8.13625		2.9542	3.11066
114		4.48169		6.76681	15.5589
115		15.3546		2.43872	32.6659
116				2.26981	13.3831
117				0	6.36641
118				11.1894	1.73471
119				0.876574	3.97613
120				0	5.8337
121				4.83136	27.6239
122				2.47668	2.77878
123				0.91115	24.7694
124				1.61743	8.58151
125				10.3913	68.8695
126				0.570514	5.96883
127				2.81006	21.546
128				6.16942	1.43148
129				8.54944	74.0309
130				0.647169	31.1402
131				3.32123	9.08918
132				3.81735	7.98078
133				14.6313	18.3546
134				0.549223	26.2943
135				8.29953	10.8146
136				9.09111	7.78662
137				7.6047	7.01202
138				2.21336	6.5113
139				4.38205	22.4508
140				0	12.7429
141				7.32868	5.34642
142				0.228774	6.96916
143				2.60762	1.36162
144				23.8881	8.51952
145				2.68234	0.399664
146				1.83717	2.76769
147				1.91725	2.87885
148				2.86501	13.8971
149				14.4584	10.5073
150				14.14	15.3697
151				1.94502	9.74154
152				0.8275	95.2415
153				1.91433	32.4798
154				10.6042	7.14675
155				11.0617	6.72932
156				1.05137	19.8869
157				9.03813	5.79566
158				9.70907	2.92976
159				15.815	2.80038
160				12.8737	26.7048
161				1.38729	86.2148
162				5.73007	12.5008
163				1.60912	7.86701
164				7.02825	5.194
165				0.654425	2.57853
166				9.77741	2.38124
167				4.35221	6.09574
168				3.95229	11.1353
169				1.88795	6.43504
170				5.76309	8.88433
171				1.09135	3.78831
172				0	35.9448
173				2.53938	9.46697
174				1.5725	28.8494
175				0	114.124
176				0.756882	13.5461
177				7.59457	10.8695
178				2.00741	18.8983
179				2.5867	0.523287
180				3.50253	2.51426
181				2.62301	11.3662
182				7.53824	28.0037
183				5.74356	3.47849
184				5.0968	4.58319
185				6.03821	3.23914
186				3.69728	0
187				1.43111	17.5496
188				3.94352	4.22226
189				2.66186	3.37137
190				2.30579	37.5931
191				1.10577	8.94899
192				0.68803	7.49961
193				2.3797	3.79678
194				6.261	18.9734
195				0.926728	7.225
196				7.9524	14.7135
197				0.480123	6.83523
198				2.83984	3.19911
199				3.54195	0.657272
200				1.86941	21.5377
201				0	3.16189
202				2.84383	0
203				0	8.14642
204				0.674261	1.95369
205				2.03728	3.779
206				2.90789	1.8514
207				1.68865	11.9391
208				1.44956	21.8489
209				5.535	10.1249
210				1.78066	2.74034
211				0	5.60644
212				0.459421	14.8676
213				1.68402	13.9788
214				0	1.95152
215				0.592665	7.52554
216				0	62.9293
217				0.314251	49.7741
218				2.20135	2.8763
219				1.27867	13.2215
220				1.71271	9.279
221				3.84072	13.8405
222				3.26807	8.09754
223				25.0977	87.6831
224				5.38687	11.0903
225				0.806446	9.62248
226				4.21307	4.93091
227				4.41737	10.008
228				4.0927	7.53237
229				0	10.6896
230				1.73225	11.0213
231				5.70517	7.84328
232				1.84675	1.4986
233				6.30943	17.5521
234				2.02776	3.27371
235				6.55334	4.53895
236				1.6828	10.9556
237				0.409401	17.2037
238				2.7394	19.699
239				15.4568	4.16598
240				1.67954	5.01711
241				1.12897	5.60825
242				4.19431	6.43978
243				1.35287	6.66291
244				1.52857	8.47803
245				9.83339	13.5894
246				5.73667	9.4721
247				3.65466	13.6107
248				4.41182	4.6827
249				0.628483	15.1385
250				5.89522	6.5143
251				3.49377	20.0802
252				2.28451	11.2864
253				11.1197	30.3259
254				0.763091	7.3319
255				2.6258	9.80872
256				16.5769	18.0195
257				1.09446	19.66
258				3.85107	25.0232
259				2.19212	26.0144
260				11.6269	9.51441
261				6.95297	16.6361
262				2.20311	68.6674
263				6.31944	16.6631
264				1.95824	27.6827
265				3.15655	15.0091
266				5.61129	11.0284
267				8.67915	10.8269
268				2.07115	19.4675
269				5.65132	21.2594
270				2.27221	34.2117
271				3.93501	12.7477
272				7.83807
273				6.12688
274				3.58386
275				0

## Sheet: Figure 4G-Process Area
	Process Area (microns^2)
	Mouse 1	Mouse 2	Mouse 3	Mouse 4
Baseline	23.892	11.984	10.35	17.246
Kainate	29.299	22.623	16.052	27.708
