# Supplementary material for: Microglial calcium signaling is attuned to neuronal activity in awake mice
Source: eLife. 2020 Jul 27;9:e56502. doi: 10.7554/eLife.56502 (PMC7402678; doi:10.7554/eLife.56502)
Supplement: Figure 5—source data 1. [file elife-56502-fig5-data1.xlsx]

## Sheet: Figure 5E-% Active
	Somata % Active										Processes % Active
	Area 1	Area 2	Area 3	Area 4	Area 5	Area 6	Area 7	Area 8	Area 9		Area 1	Area 2	Area 3	Area 4	Area 5	Area 6	Area 7	Area 8	Area 9
Baseline	23	25	31	47	26	19	25	10	29		55	27	45	46	48	40	19	28	21
Day 1	87	56	100	80	33	31	63	65	33		97	81	72	84	68	53	82	79	53
Day 2	47	81	50	60	44	50	75	73	94		72	69	65	71	60	62	81	77	77
Day 3	89	63	61	67	22	69	75	39	83		87	67	58	64	60	67	74	62	85
Day 7	67	55	94	47	94	31	75	21	72		58	52	85	53	85	46	61	31	59
Day 10	27	44	76	67	67	13	81	94	44		40	63	85	45	73	46	76	69	35
Day 14	29	25	76	67	72	19	44	21	11		53	56	76	69	66	36	36	22	34

## Sheet: Figure 5E-Signal Area
	Somata Signal Area										Process Signal Area
	Area 1	Area 2	Area 3	Area 4	Area 5	Area 6	Area 7	Area 8	Area 9		Area 1	Area 2	Area 3	Area 4	Area 5	Area 6	Area 7	Area 8	Area 9
Baseline	2.46937	6.14122	6.05178	3.25982	1.2782	13.7516	2.65125	3.64653	3.76322		9.70768	4.04488	6.46035	9.30812	10.4417	6.92126	2.49027	3.86387	3.32578
Day 1	29.8002	67.802	41.8849	15.1366	6.69918	92.4958	44	471.121	6.90866		434.823	142.277	41.0366	97.6054	23.0673	20.026	146.357	77.7802	69.1362
Day 2	35.976	24.3675	9.9929	9.74915	89.8115	59.7631	135.21	95.5766	48.8818		147.166	30.7464	74.574	115.126	41.7076	62.3995	58.8567	65.0366	37.6614
Day 3	70.5254	21.2795	73.3823	35.6308	281.506	42.7523	37.1967	202.579	427.53		129.073	27.033	24.4703	64.3128	40.5823	131.868	57.0314	41.4161	225.883
Day 7	27.5765	148.19	14.419	94.6401	7.92732	52.9047	9.68266	29.7651	87.3188		18.9779	21.2748	134.963	33.7113	57.8951	21.9008	22.7775	11.6451	21.5939
Day 10	14.1681	86.4851	80.0443	106.166	1.97341	71.759	55.2829	6.14222	4.52277		8.1775	43.1405	97.2264	54.8711	94.9232	9.17584	46.618	31.627	5.4035
Day 14	5.65206	90.2363	55.6877	48.07	2.89759	23.4793	3.42106	3.87919	2.3003		13.9475	18.8088	64.9162	51.1557	37.6046	5.63443	14.0187	3.73338	4.82767

## Sheet: Figure 5G-Motility and Calcium
	Stable	Ext./Outgr.	Retraction
	5.01084	41.1261	12.0916
	1.958	38.7758	14.9043
	3.85194	61.5048	10.0685
	35.9138	89.6185	4.86697
	45.318	84.4641	15.2366
	36.6773	118.165	15.8861
	16.8201	42.4636	4.31439
	0.72622	24.4836	4.41471
	4.87588	18.3106	20.6872
	6.3477	26.3544	19.0845
	10.2376	11.7741	7.56238
	2.15814	5.32082	11.3991
	4.16889	1.11789	8.29634
	9.10941	13.1178	9.15978
	5.84584	133.139	4.46293
	0	74.7769	154.168
	14.0247	54.3497	3.2128
	3.70342	17.7087	8.94114
	18.1814	3.30122	4.82307
	21.6185	17.0948	26.8365
	5.18527	57.1086	15.1071
	8.79255	66.756	3.5317
	1.0979	17.4713	1.93578
	63.8006	19.2956	5.02144
	6.24865	25.0567	8.41638
	19.8169	46.3561	6.31272
	28.2312	40.8326	6.50286
	3.26504	15.4263	8.66503
	4.77272	3.99254	13.8245
	11.2913	40.9608	15.4002
	2.06016	42.0412	6.8915
	19.8749	3.88853	11.9328
	15.4696	25.2844	8.95652
	0.89111	24.3163	1.40493
	2.38413	5.87169	2.85406
	6.51315	22.2749	1.67202
	6.08199	3.12324	7.93569
	13.1951	11.3635	22.6067
	3.93875	9.21491	6.79057
	12.7257	4.21689
	6.12267	21.1642
	0.8902	32.3991
	7.61911	16.573
	1.61246	14.5514
	8.97914	5.77331
	3.57347	19.4809
	6.13339	34.2157
	19.4373	6.91155
	1.23415	51.6161
	0.939734	30.4357
	0	37.6102
	9.3564	6.87812
	0	43.3962
	3.20931	30.1408
	16.2521	23.6387
	4.11494
	0.543088
	3.54035
	0.563164
	3.65434
	2.32474
	2.13484
	11.9579
	3.10323
	6.45561
	12.3905
	3.60026
	1.2904
	3.06541
	5.1563
	3.17285
	0.618582
	6.85896
	0.611011
	39.5843
