# Supplementary material for: Microglial calcium signaling is attuned to neuronal activity in awake mice
Source: eLife. 2020 Jul 27;9:e56502. doi: 10.7554/eLife.56502 (PMC7402678; doi:10.7554/eLife.56502)
Supplement: Figure 6—source data 1. [file elife-56502-fig6-data1.xlsx]

## Sheet: Figure 6D&E-Neuronal Calcium
AAV:	CaMKIIa-Gq DREADD				CaMKIIa-Gi DREADD					CaMKIIa-Gq DREADD										CaMKIIa-Gi DREADD															No DREADD Control
Drug/Dose:	Saline									Clozapine N-Oxide, 2.5 mg/kg					Clozapine N-Oxide, 5.0 mg/kg					Clozapine N-Oxide, 1.25 mg/kg					Clozapine N-Oxide, 2.5 mg/kg					Clozapine N-Oxide, 5.0 mg/kg					Clozapine N-Oxide, 5.0 mg/kg
	Mouse 1	Mouse 2	Mouse 3	Mouse 4	Mouse 5	Mouse 6	Mouse 7	Mouse 8		Mouse 1	Mouse 2	Mouse 3	Mouse 4		Mouse 1	Mouse 2	Mouse 3	Mouse 4		Mouse 5	Mouse 6	Mouse 7	Mouse 8		Mouse 5	Mouse 6	Mouse 7	Mouse 8		Mouse 5	Mouse 6	Mouse 7	Mouse 8		Mouse 9	Mouse 10	Mouse 11
Baseline	100	100	100	100	100	100	100	100		100	100	100	100		100	100	100	100		100	100	100	100		100	100	100	100		100	100	100	100
15-30	75	115	96	112	87	86	91	116		120	105	100	95		140	126	187	82		64	87	57	78		56	63	72	78		40	59	38	38
30-45	97	96	101	108	98	93	109	108		147	127	157	136		156	168	192	162		63	73	66	74		39	45	58	53		38	32	24	39		112	96	95
45-60	70	122	95	100	103	99	82	116		117	121	113	112		135	149	187	122		85	68	53	57		36	51	63	68		38	29	17	35
	Values from the 30-45 minute row were used in Figure 6E summary analysis, because they represent the timing of peak effect

## Sheet: Figure 6I-Microglial Process Ca
AAV:	Both		Groups			CaMKIIa-Gi DREADD					CaMKIIa-Gi DREADD					CaMKIIa-Gq DREADD					CaMKIIa-Gq DREADD
Drug/Dose:		Saline Injection					Clozapine N-Oxide, 1.25 mg/kg					Clozapine N-Oxide, 5.0 mg/kg					Clozapine N-Oxide, 2.5 mg/kg					Clozapine N-Oxide, 5.0 mg/kg
	Baseline	15-30 min	30-45 min	45-60 min		Baseline	15-30 min	30-45 min	45-60 min		Baseline	15-30 min	30-45 min	45-60 min		Baseline	15-30 min	30-45 min	45-60 min		Baseline	15-30 min	30-45 min	45-60 min
	0.242584	0.424555	17.6159	4.82071		6.03236	2.98231	15.6043	7.82551		3.24304	3.24557	13.9918	3.8899		0.560017	0.637897	2.52848	28.8714		4.88259	4.06274	23.7362	7.62887
	1.78126	1.61936	3.53838	7.64605		3.05138	4.7402	6.12554	3.53672		1.69007	10.4665	0.896716	5.98192		3.21005	2.57928	7.30875	10.6336		2.20368	5.19324	10.3109	2.02282
	3.26335	0	15.0675	4.29668		5.82048	4.72929	9.31954	5.29761		0.828344	12.3867	1.73941	11.7549		0.805714	2.88656	1.91204	10.4246		4.42347	4.09669	24.7911	3.20504
	1.86323	0.693425	9.19055	4.75989		13.3902	5.49901	3.97609	0.89341		5.29922	0	2.00344	3.03061		3.22266	2.94962	3.38644	7.92961		4.7408	12.9018	6.7683	4.42317
	3.34015	4.07286	6.96255	7.16046		6.80679	7.02572	4.71684	3.69268		0	3.55258	7.4768	31.9748		0.459348	5.29354	0.552199	15.2524		8.4445	15.5549	15.949	20.1819
	1.68448	2.6924	7.45333	1.76562		7.21064	12.374	13.0174	3.58883		21.8516	7.28392	10.0986	0.618761		4.39269	12.6546	3.36646	8.15278		5.34905	1.93403	18.8708	7.75081
	5.48893	8.64636	17.3432	15.5457		8.16163	0	11.061	7.38744		20.258	4.77533	4.74949	6.8562		1.0154	1.91062	3.85595	5.16658		4.62705	7.61416	4.14995	3.49486
	2.51002	14.9569	5.07758	2.74582		0.683293	6.34673	6.22653	6.56697		5.39952	0	0.612537	19.753		27.5904	3.98963	0	13.8152		0	4.55639	24.195	4.89302
	0.916865	0	0	6.44901		0.768901	7.25657	3.613	5.03424		9.76428	0.776246	4.87483	9.5286		3.63473	3.82195	4.82927	2.04178		19.5552	5.69966	23.8878	11.3914
	2.52786	3.6756	2.88779	4.28213		1.05169	3.61873	2.92728	7.77954		1.8834	4.63937	76.4756	2.27277		7.30871	4.69089	1.72247	4.5372		0.641816	3.66827	2.12825	3.45929
	3.56553	29.0555	3.17071	2.35937		0	0.589445	0.702083	3.06284		0	9.47466	21.3086	25.3103		1.95969	2.48368	4.39137	5.61827		0	4.89782	12.1172	4.68096
	3.39379	14.9283	3.06918	4.43483		1.54107	1.2715	5.62581	5.46298		2.91537	3.3114	3.67393	6.48672		12.3103	1.8085	9.43183	7.89242		23.3486	2.57344	5.45826	22.2678
	2.54875	0.962874	5.1659	6.9155		5.90842	9.92224	3.49276	6.1516		8.45677	4.17446	5.84523	23.628		1.17399	2.87068	1.8356	4.37444		0.636827	22.414	11.1073	80.9779
	3.45447	14.359	15.6591	3.01914		2.4716	6.1411	5.03308	6.07946		8.67037	2.93885	14.8673	22.4974		0.734845	1.86964	15.8842	11.7335		5.01121	5.17875	1.20803	22.4297
	1.39094	1.64325	1.57184	3.16081		0.814447	1.4508	11.596	14.9349		4.08728	21.1269	29.6702	1.32337		14.9707	3.24255	7.77863	10.0293		1.71725	2.30906	8.64739	6.32831
	36.3313	4.03436	1.11674	4.18005		0	14.5628	4.01632	10.198		0.981512	1.21691	30.3453	13.0464		0.89478	7.12057	2.75705	1.16841		1.14591	11.5984	21.8679	4.06825
	0.577388	12.7156	11.6088	3.3469		3.93512	7.7814	6.52844	3.82616		6.09826	34.0374	7.13737	58.817		3.13068	5.30432	13.6981	8.93439		2.40905	4.87302	7.18963	27.9615
	4.08418	9.84229	3.73711	6.92265		11.1324	1.33892	4.57709	6.34081		12.6708	1.21713	1.85699	5.06288		1.54489	4.61555	11.0632	7.28983		0	0.633006	4.86888	9.05893
	5.74684	1.47078	6.55413	5.7527		4.69473	0.767299	18.8445	5.2507		5.53309	3.70262	7.00475	26.1921		3.33761	2.24659	1.69053	3.49221		8.28201	7.43967	8.45828	3.8943
	13.4733	9.85523	2.85144	7.71334		5.20993	3.58661	27.2664	12.5348		5.31804	47.6168	14.548	83.7488		3.25649	0.593694	8.28899	14.9782		2.23041	11.435	14.2856	1.80409
	3.67794	0.880517	16.5038	6.30915		2.29463	1.86072	3.13906	2.98765		12.1328	5.98811	0.463339	14.5821		6.35654	6.70354	1.86427	2.51559		0	5.01757	20.9136	4.26406
	3.80807	10.9655	6.16263	1.84909		1.73386	3.21301	2.1823	6.78913		0.711942	3.87791	39.5698	3.1557		7.35361	2.63515	7.15707	0.543602		4.22035	4.25649	13.5969	6.06215
	2.63913	0	1.27456	1.3617		4.65235	6.41946	7.71426	16.2071		12.6041	6.03059	7.58806	14.713		2.53854	4.96225	0	3.56297		15.3845	3.62434	0.591101	1.86078
	0.727406	1.19988	3.54303	7.66881		3.21191	1.35392	14.0781	3.92038		16.5394	2.66352	1.67571	18.0013		6.70148	3.19775	7.4328	4.00988		0	3.25409	4.66427	5.12664
	4.09705	4.25067	11.9375	3.77687		3.11145	11.4647	7.30581	0.844711		17.0023	6.18544	39.6006	31.3187		3.90914	1.49121	4.06132	3.02575		20.7634	78.9419	16.0671	3.564
	5.52179	4.93246	0	1.95928		0.927042	9.47592	7.01979	3.61989		9.89641	1.0378	5.05214	0.596735		3.73094	0.809588	0.828455	2.20602		0.339877	8.47168	20.782	14.1879
	3.25904	1.79957	0.843572	0.681207		2.93046	5.25528	5.18597	4.75777		2.47535	1.1869	75.2783	2.75725		0	6.48014	0.682035	3.55005		3.21637	0.902168	4.4387	3.74079
	4.29078	3.98681	9.56316	0.731859		3.71554	2.26127	2.51397	4.23461		5.17203	3.12278	1.48057	28.1977		38.001	2.35656	2.3227	7.23198		4.25236	10.3154	8.38929	8.44795
	1.76017	0	0.731948	0.600026		22.8638	4.96742	1.74151	9.87549		16.6612	21.0104	28.7462	5.05706		0.683059	0.553844	4.33448	17.3045		2.6826	5.89955	4.11157	1.87472
	1.8909	0.416793	8.88769	6.61482		4.71972	5.73991	3.59868	9.6046		12.7713	7.98876	16.0288	42.9253		4.55847	21.3671	12.9943	1.44631		6.21307	87.2383	3.18005	3.84658
	3.43942	1.58343	13.6954	3.03796		9.61078	20.8213	6.98221	6.16999		4.81182	2.29761	3.90935	2.54366		6.93059	8.07003	4.76989	2.39528		2.14709	6.72384	16.5035	21.2873
	6.62581	1.68244	13.4209	1.69844		5.08726	5.10247	3.36492	15.2756		4.14408	7.53818	23.8385	19.7216		1.60275	4.67315	14.1001	6.73883		2.88001	2.62351	12.5719	0.382317
	1.72186	0	6.24037	4.22376		0.720981	0.915884	2.12768	9.01032		0	24.3006	20.5897	38.2161		4.57688	1.07886	3.57893	19.3792		20.0522	5.38402	29.0584	11.5091
	5.80947	15.7671	11.3222	5.87377		7.94637	2.26443	13.2047	15.3151		5.07467	33.8261	35.5145	1.34295		5.40558	7.16349	12.4533	5.09698		6.17047	1.31219	13.8715	4.26271
	0.637964	1.61862	2.1796	2.52219		0.812494	1.92373	4.53352	4.79696		4.6877	5.96493	56.3738	55.6783		6.0669	2.25502	7.85919	0.302986		19.3157	0.5176	5.2869	12.4324
	0.265943	0	7.63092	2.73177		2.15345	6.451	5.08363	3.05593		10.6069	1.66382	22.0396	2.91135		2.23141	11.4036	10.9161	3.57951		5.6931	7.31105	21.458	6.59641
	2.74306	0.485805	1.44617	0		6.77193	7.77332	2.63099	7.29195		1.35844	17.3807	1.17866	3.20044		0	1.17142	4.84739	2.65136		9.09028	3.90276	43.7045	14.791
	1.50298	0	3.34764	14.8651		4.36639	0.494129	8.06521	10.4431		0.766945	0	1.08976	14.1926		6.04291	2.11368	10.7476	2.44113		0	8.68974	5.87781	9.21537
	0.883431	4.78146	10.8627	3.18571		10.9829	9.59557	6.91205	5.93846		16.7702	27.3708	40.4377	5.81817		1.93628	12.021	2.41528	0.713211		2.51811	3.19369	35.6905	7.11589
	2.25152	5.44567	3.06388	5.01239		2.52916	27.1634	3.4285	9.70711		13.3445	3.50441	5.56235	1.99884		2.36743	4.5146	11.5	2.87263		1.09803	1.62873	2.67888	0
	6.10097	1.96018	7.36925	2.46978		15.4129	3.37195	7.57395	14.4516		3.141	4.86386	1.94002	3.46229		1.26924	0	14.2139	12.4565		7.74794	8.02183	13.1332	6.10517
	1.68185	3.62041	0.380877	3.48975		2.80983	4.15892	3.56546	0.911472		11.2224	10.8545	7.02969	11.1727		4.55349	4.55196	3.06013	6.75157		2.68809	2.00492	10.8327	65.7325
	2.51109	7.98552	0.944479	17.0804		4.53262	1.47108	1.63121	12.9195		24.8122	20.0502	3.39572	3.0628		4.91806	5.17072	0.869947	17.962		5.63206	0.822446	13.4304	5.42205
	1.76165	2.0356	17.024	3.76526		14.8095	12.6546	8.74975	18.5484		6.15493	51.761	6.08357	16.0246		2.28312	0.627554	5.90679	4.70864		34.3007	0.443337	12.8527	3.28333
	1.65875	4.18509	3.26219	1.13259		1.52711	6.74656	8.5084	26.1956		8.65848	108.577	6.90225	4.12456		3.875	2.56589	1.62138	10.7375		7.95455	7.45299	39.6218	9.20696
	8.89424	1.0321	2.26887	0		18.2627	4.7081	32.282	13.0769		1.86491	9.71929	20.759	2.43375		0.944126	7.63488	21.3941	10.9803		3.88053	7.44153	2.08301	38.2357
	9.16539	3.15822	0.541663	6.75324		10.9121	6.35713	11.74	9.01796		20.5011	0.734241	1.41831	61.5355		13.0158	6.82156	3.8016	0		0	0	8.10111	8.29943
	2.13125	3.65127	4.68302	5.61373		28.1212	3.20157	19.2758	12.0322		0.329077	10.4686	0	15.1681		0	0	9.77161	6.23836		1.95513	3.51653	19.2084	5.9391
	3.60232	5.55413	2.56498	3.15637		1.01975	1.11256	6.35093	10.7169		7.18343	0.480432	9.66393	5.4017		1.10455	0	8.70177	5.97439		16.8809	4.16714	12.1918	18.2396
	6.37267	0	29.5601	6.96396		0.844421	7.45093	16.6184	16.592		2.19729	0	2.38847	9.13739		11.8165	1.94451	3.35062	11.8471		1.54963	19.0736	60.2649	0.923173
	2.9899	0.302821	16.4886	2.58863		6.19788	1.36594	18.852	26.4286		15.1176	7.07685	45.9669	2.19775		18.7291	0.643467	2.36457	4.36027		0	16.3158	26.0992	11.0804
	2.22503	1.61057	1.93902	0.524702		15.0707	10.7865	8.10387	2.45151		5.48173	1.83423	22.9513	17.5459		8.08922	7.45553	6.79674	7.03696		0.607444	10.4872	24.6359	5.69663
	10.4825	13.685	9.06012	1.78957		6.63661	0.540982	11.0711	18.9126		23.7747	0	9.27817	5.69094		5.19214	3.1186	3.11359	3.11627		5.04935	0.732775	8.49535	2.05818
	0.681633	0	3.9549	4.58208		1.36918	4.78863	3.22751	10.0528		4.45006	3.06398	3.3899	35.6883		0.769619	1.90694	6.1906	4.2059		1.69426	16.9689	7.14389	22.6557
	2.24549	3.31942	1.98145	16.2112		2.19587	3.37264	7.36184	5.55021		0	0.876858	9.68554	37.6712		5.38033	1.10498	2.01032	5.44016		0	1.86645	14.4069	7.64325
	0.766953	6.24738	10.0703	2.64106		3.38905	7.91499	2.30079	8.70175		1.99558	7.21856	3.26828	10.9281		0.801986	2.83902	23.7164	1.62829		0	46.7758	49.0693	2.52948
	3.52878	2.70577	2.01126	4.47455		1.56435	2.77172	11.2455	12.2036		0.623958	15.8527	10.034	12.595		5.47606	1.99339	9.04132	2.97778		5.58513	1.38177	6.42893	10.0936
	1.74457	23.847	8.27954	0		0	2.20763	8.67729	15.2306		3.67157	6.50847	20.6574	27.5314		8.50106	3.55572	3.11341	9.43423		3.59375	4.77301	8.34057	45.177
	9.5305	0	10.1891	7.92025		3.32876	8.447	6.82952	19.9549		30.1116	1.43329	6.5899	27.0797		13.8323	2.34966	4.06846	4.4626		0	4.43955	2.98513	2.66042
	4.76589	0	3.42358	2.09261		3.11895	2.90551	1.79321	1.37409		15.6216	9.21202	9.88603	65.186		0.596622	1.01036	2.37458	4.75271		10.0565	37.4535	1.41196	6.8048
	3.66683	11.3908	0.993958	2.67688		1.35041	8.18247	14.2448	9.72535		2.47587	0.468405	24.8864	24.9137		2.27329	0.649182	0.78565	4.5554		1.65788	4.05776	1.68142	8.09583
	4.39091	6.57733	9.7114	0		6.86303	2.43468	11.2197	7.19455		9.71097	4.53996	12.4719	37.4899		20.261	0	3.51313	0		1.94129	44.3014	4.68506	1.16874
	3.47341	1.68984	0	4.13435		4.21702	1.03217	7.45207	16.5856		5.85599	13.4496	12.3171	37.3771		1.62514	2.09956	2.66714	3.98287		8.22368	2.30954	11.0096	19.8555
	2.74641	5.25647	2.43523	4.86777		0.841637	7.21351	4.21355	6.71735		9.3454	1.26866	8.44047	38.4305		4.5681	6.06483	11.0776	2.36821		8.04106	19.0915	2.80805	2.28492
	5.38605	2.29551	3.62355	4.34648		4.78461	0	2.70679	18.6049		38.6148	2.92704	28.3607	36.5216		3.99894	3.63321	7.31286	4.87587		2.09002	1.87523	5.35592	4.84349
	3.35036	0.360931	1.10012	1.02912		2.73678	6.42334	8.60208	1.64781		1.15415	2.90269	49.647	23.0507		4.6932	10.211	5.05938	0.830773		10.4344	7.37159	16.5411	31.4647
	20.1312	3.18897	2.41872	1.08677		4.09334	1.75837	3.37284	9.25966		8.83482	9.64055	153.523	11.7367		8.0454	4.92903	6.10181	17.7091		1.10983	10.7955	15.7105	9.70938
	73.0194	8.15198	4.44857	1.46721		2.82762	0.716437	3.48342	4.92782		8.94439	6.04444	21.2417	4.01856		3.32192	0.54725	9.84275	5.47898		15.3387	21.6387	2.75176	8.40482
	2.22264	6.21172	3.44907	11.1561		1.67984	0.714386	3.18667	2.27197		2.97262	7.911	20.0232	33.3969		2.32667	1.99097	14.1286	1.7167		0.928102	6.21851	29.7649	2.94972
	0	0.606877	0	6.48287		4.34415	0	7.2779	4.85241		8.01258	4.70759	40.0916	18.8045		7.83826	0.907944	5.6272	4.18719		0.602508	28.7729	48.3222	20.7854
	0.637137	10.2768	2.10138	4.31559		4.1095	8.95712	18.8537	6.01124		15.8697	6.24416	51.2424	10.3123		0	4.27749	14.8067	9.73903		27.5252	17.7401	1.55027	38.5569
	3.0248	0.529657	1.81529	9.87628		1.28652	2.04699	1.25272	6.85907		5.28137	26.4973	29.1779	3.34804		4.18158	1.74033	6.53839	12.7699		1.86777	20.8961	5.37721	4.71839
	0.615384	2.23262	2.28039	4.46144		2.55929	3.86354	9.0313	6.70414		16.8893	22.1736	13.0627	12.9804		8.6404	5.27744	4.45007	8.25493		3.91722	8.21602	5.10427	26.6527
	2.92002	0.623204	5.44229	6.31768		1.9615	2.00683	3.10384	12.9829		0	9.78904	6.449	41.937		2.37767	14.5756	3.17506	3.76869		5.97609	6.27737	3.82689	50.354
	2.82765	0	2.55301	8.35377		11.1069	3.5731	11.3014	1.62634		6.20415	5.03009	15.527	22.6963		4.02788	5.40283	4.24948	4.92961		6.86235	7.45472	15.2896	14.5517
	10.2181	0	0.378484	2.32525		2.26034	9.97148	5.49387	1.72132		1.05052	0	6.50186	3.53431		5.38385	2.23305	4.70177	5.70425		2.17033	3.17177	3.98705	15.8448
	3.19621	2.92417	1.6	9.30425		13.0323	2.19661	5.45923	3.68695		2.93067	5.16796	4.79327	2.71078		0	9.11746	7.11313	8.63269		8.33382	11.2414	3.53936	34.9963
	1.78917	0	15.9757	1.36169		3.7085	2.10408	2.07516	8.48426		1.43127	6.64847	68.6367	2.7053		5.1459	0.531628	6.38885	10.051		2.50236	7.9609	2.38565	12.3169
	5.96966	3.9542	2.99006	1.39862		1.86176	55.776	2.33479	0.735497		20.0881	13.5574	4.9725	8.23486		6.12227	4.40888	2.43584	6.62063		14.5603	3.5769	5.98933	1.55625
	24.3961	1.7101	23.1869	2.19218		1.45166	3.11431	3.6178	22.2338		7.11706	11.1076	62.0954	6.29792		4.98776	0.415178	9.54572	19.3751		5.52093	1.97256	4.33261	3.27079
	0.995285	9.18036	8.14164	5.39722		0	10.4405	7.26856	6.39888		4.37336	6.59704	20.1952	2.47355		6.63701	2.57712	5.69869	23.7089		10.8736	0.85912	4.48558	3.53431
	3.05258	3.28135	8.22249	2.65824		5.70377	4.01544	7.06128	7.75713		28.3437	11.3091	1.5621	2.43979		0	4.15795	2.97567	3.75825		0.714176	3.05919	4.34209	2.71078
	2.95467	2.31143	3.0386	2.58888		0.473372	5.94346	12.0315	11.1798		5.39097	3.19327	22.3573	7.18651		1.25943	11.2996	10.1433	13.2196		8.06365	7.86327	6.71665	2.7053
	2.04349	4.94067	1.0737	2.27162		3.35659	2.42836	7.25011	2.97071		0.812499	18.1246	0.817322	3.58787		2.34425	9.75264	0.600223	2.74121		4.03522	12.4904	2.00745	8.23486
	0	4.49164	4.58326	0		3.06923	3.86804	1.83265	1.64202		17.1313	6.24314	0.690937	1.50423		1.44578	4.31604	6.4921	9.32725		0.966554	11.3846	2.60755	6.29792
	2.04631	8.61685	3.83618	4.86705		1.17138	2.08266	16.062	18.2441		3.49867	1.88512	149.408	14.6505		2.82712	6.47734	4.18437	10.8511		0.637323	3.30483	6.45932	2.47355
	1.08647	3.4587	0	1.98317		1.95956	10.0231	2.52065	14.1138		3.94121	8.87528	17.3062	34.6885		6.78363	0.45023	3.32261	5.08769		4.78375	8.92335	30.0158	2.43979
	0.910255	3.51509	5.88549	0.565728		0.845561	3.6362	4.95456	3.14935		1.41641	7.31217	2.53437	7.43266		1.60771	4.37266	3.05188	3.09422		2.81048	5.24342	35.3892	7.18651
	8.66881	0	3.68078	2.42204		7.25187	7.98056	8.78378	5.72821		3.59752	2.01653	80.8718	13.3748		0.933657	0.828804	4.68971	7.21152		9.79552	3.50439	4.60656	3.58787
	18.6398	1.52309	0.7431	3.439		5.39765	3.17554	9.45609	2.1122		31.6405	8.31058	49.4661	0		2.28143	3.56897	14.328	11.7678		2.00022	3.62561	7.48046	1.50423
	3.06948	2.80544	1.03972	5.58905		3.87182	3.54663	4.47535	5.18888		3.51146	3.48529	4.82328	37.5716		2.48191	4.16081	6.41919	6.49964		3.21077	86.0051	7.45029	14.6505
	2.66008	4.93518	7.88142	3.88452		6.14734	5.60015	12.1322	3.57171		2.21193	1.21376	44.5266	7.09365		6.71727	4.32211	7.33852	3.05568		2.14057	0.965413	4.89372	34.6885
	1.36324	1.29509	4.31438	7.90051		1.07819	9.20603	9.72895	5.22845		7.29895	21.1748	10.3757	11.8035		7.30827	9.14319	1.53599	4.99616		2.11039	7.4937	3.90393	7.43266
	5.2845	24.6859	0.875953	3.64081		6.721	1.81529	5.29196	14.8825		0.529448	7.1759	9.4832	14.2019		18.1318	3.04751	3.99149	3.11518		3.20325	17.4961	2.58565	13.3748
	1.06906	3.48021	5.55777	7.92976		2.5622	7.41135	10.9576	12.6241		8.42375	1.78027	11.0755	28.2605		2.25619	4.70815	8.81944	5.34461		6.12622	23.1917	15.4304	0
	1.46882	7.72718	0.927195	2.7239		5.8788	1.3194	3.77847	10.0489		8.53175	14.1676	59.9108	1.04048		5.60898	3.91228	4.03931	8.37913		1.02061	4.18757	27.0654	37.5716
	2.28906	0.838608	3.82836	14.5058		3.26323	6.43393	4.21371	8.14357		1.74371	8.92626	103.29	13.7764		4.72536	12.7781	5.84348	17.059		4.31683	86.7417	22.6754	7.09365
	2.51279	3.6523	1.23945	7.11672		4.47635	4.84547	8.78046	10.5665		10.1008	5.55896	53.0198	23.8956		2.94193	9.2537	1.51138	1.28208		13.5095	16.1409	36.7182	11.8035
	4.89024	2.69993	1.3193	0.531938		1.11714	4.28196	3.68034	5.86815		6.17858	12.9879	2.88241	23.9674		4.44183	3.70122	1.19978	6.67279		10.4652	10.1258	7.23338	14.2019
	3.62899	2.9207	11.3294	7.98401		5.77696	2.27771	6.47599	7.79709		5.9354	1.8011	11.9482	42.6296		1.97751	4.18493	8.64463	0		6.93459	1.88341	7.0454	28.2605
	1.28437	3.51394	3.37912	3.9036		3.30957	17.8115	7.58505	4.47895		2.4377	5.91365	4.90944	64.9619		2.91558	2.97519	2.16656	4.74934		3.93243	11.169	5.37566	1.04048
	7.24691	1.23372	4.51065	1.80756		0.503424	6.24096	3.08289	2.42358		3.95882	11.2611	25.9965	40.0895		7.36167	8.21257	4.57756	2.01047		2.38639	5.79197	4.47581	13.7764
	3.44191	5.56381	45.3518	0		0.645571	12.1232	5.38568	0.407497		7.95555	2.70613	17.2672	47.5657		4.90709	1.50076	1.22428	0.578159		2.31998	10.0778	5.73715	23.8956
	8.65082	0.769529	1.53896	13.1447		35.806	1.02478	8.57728	2.13938		7.89285	4.52153	21.4629	32.8718		13.9981	5.24675	0.712645	6.16821		16.7205	7.08716	1.16559	23.9674
	1.39086	1.65327	6.14908	11.6552		25.6627	0.72079	10.8479	1.70335		0.621192	1.78557	17.6492	18.6121		7.92971	2.2806	6.8516	11.7334		1.86804	4.89157	2.66127	42.6296
	2.76115	1.97107	2.79555	6.63676		4.49686	3.3957	4.89162	7.59329		4.18152	12.5647	15.5068	64.575		3.75909	1.35942	2.89818	2.69407		5.71269	1.07517	6.78108	64.9619
	3.29512	5.47863	4.33439	1.21487		8.31914	3.54421	5.72668	6.26056		2.80868	5.78531	7.53491	4.75004		4.97542	5.48067	10.6756	12.0178		18.24	5.73964	11.4343	40.0895
	0.5544	0	0.429579	16.9459		11.0613	1.60334	8.15766	26.2088		5.91029	21.0913	16.8035	18.3282		3.30715	2.23325	11.2511	0.613547		0.305988	1.79873	4.70558	47.5657
	2.54704	10.3606	1.44448	5.32277		11.1809	5.62671	6.64014	7.44003		2.25517	2.33077	6.47598	13.5977		3.11169	1.99181	2.64057	21.4333		2.9272	1.33988	12.4744	32.8718
	6.97365	2.86112	3.75082	1.9388		0	2.75575	7.02673	5.16032		1.74402	16.799	25.4106	32.3412		7.13819	9.26777	6.49001	6.8604		0.719809	4.85563	0.708549	18.6121
	11.2024	5.94229	1.89153	43.9263		15.6607	12.5882	2.66	5.10697		2.6264	23.3895	7.72038	45.0192		3.45324	3.16512	5.34834	2.87678		5.27018	1.28388	1.16027	64.575
	5.53691	1.66627	6.57199	3.8895		19.294	11.0986	1.01096	5.53712		3.61216	11.9468	5.1083	4.61953		4.12077	4.45677	2.36508	2.45921		6.31418	12.2563	3.13344	4.75004
	2.43043	3.65913	1.02604	3.10358		8.97236	5.76269	1.84911	23.9255		3.42823	3.24681	7.7482	3.5542		0	3.82263	3.96763	15.822		5.30063	1.49123	12.5214	18.3282
	1.34411	1.48782	2.90647	2.37099		1.54097	5.47437	3.89491	9.29421		7.10805	10.0594	11.1183	44.4877		5.49281	2.73858	7.76852	2.24825		3.43343	3.90042	0	13.5977
	8.6176	8.78727	9.03607	2.42065		1.85812	0.66959	3.38037	4.20762		4.02458	7.85526	12.6942	30.4206		1.29719	2.94583	10.3216	1.82871		5.16138	3.53146	5.16185	32.3412
	4.62785	8.58745	7.40643	10.0426		5.8161	2.00566	6.44847	8.31494		10.9385	0.929627	12.5606	27.7128		8.47849	9.80608	3.98498	0.731241		6.42604	0.768519	6.46949	45.0192
	7.44742	5.39626	3.63956	1.49967		1.10395	6.88334	12.4929	7.08955		3.68205	5.09102	21.8335	11.0069		6.25096	3.17697	2.0686	5.28143		2.97994	26.1543	10.8588	4.61953
	3.83141	1.92639	4.62544	16.255		5.04156	0	4.60979	3.99505		7.29225	11.401	14.7913	5.93902		3.90322	1.79027	3.25904	1.25811		0.871119	5.64277	11.1068	3.5542
	0.463152	14.0478	0.772431	5.83488		1.13563	3.4823	9.54926	7.76225		1.23944	10.2433	10.7867	16.224		6.15378	3.54598	3.04599	6.975		10.6647	0	37.8383	44.4877
	3.10167	2.26702	0.458906	4.48358		0.95594	4.91587	5.27273	5.85912		2.48072	0	31.6948	13.136		7.41837	2.91998	5.14939	10.4218		3.37279	1.59313	4.45166	30.4206
	4.77522	11.2392	3.16795	0.242627		0	7.73744	12.5321	98.8987		1.31353	1.97097	27.563	15.6389		9.13006	3.06778	16.4248	23.3018		12.3513	6.57931	23.066	27.7128
	4.70038	4.39914	3.27996	4.98928		42.0964	0	6.42586	22.7424		8.19486	25.9372	6.97691	8.34599		6.76825	0.665784	13.9057	29.4856		6.91258	3.1991	20.4697	11.0069
	3.05273	4.6267	0	6.36524		5.70875	35.1944	3.29441	34.8593		11.8065	14.4619	2.10499	11.6418		2.87356	16.7793	5.47574	10.1675		8.48792	6.27892	39.2764	5.93902
	1.8783	8.96125	0.646177	7.46725		3.20257	10.4967	55.2057	32.2234		14.6412	116.834	8.31482	21.5846		1.80173	6.29975	6.0306	16.792		0	0.957061	17.7628	16.224
	1.22607	2.83658	4.15859	0.618719		24.5012	8.94052	60.1598	8.30718		2.54328	7.47621	20.8219	13.0041		14.816	13.1159	7.58395	7.54847		4.04411	7.10996	9.95286	13.136
	0.627688	0.426208	1.48786	4.93808		19.2191	0	49.9374	8.56982		9.62071	3.64532	3.60451	19.5201		4.00041	5.7629	3.9442	9.46626		4.62579	4.97569	10.8251	15.6389
	0.829915	2.5675	2.53624	7.23884		0	17.4936	0.810006	8.58389		5.8758	3.11671	21.6202	3.83415		1.858	0.849386	0.718276	4.18693		10.7048	5.87472	19.9244	8.34599
	6.47381	1.10379	2.99398	5.52284		0	13.6185	0.72392	5.60959		26.6831	5.70345	3.54445	12.0923		1.99311	0.469126	2.99396	1.94888		5.41232	5.53294	0.387929	11.6418
	0.874213	0	2.01039	7.93493		0	3.62169	4.04806	24.0076		0	1.40563	5.06971	20.8436		1.58729	2.47432	8.07846	8.79104		22.803	3.88979	8.8877	21.5846
	0.805275	16.5512	2.77241	3.75637		0	18.341	9.15877	4.90987		8.97757	6.28519	27.1169	39.4645		0	2.08763	12.0096	6.35303		4.71858	4.67269	19.602	13.0041
	3.88621	4.74907	4.18983	7.81442		3.93208	18.1686	0	8.85662		1.82035	8.31189	32.9927	38.9359		2.46782	1.80983	1.57993	7.94966		0.717715	2.38258	1.31448	19.5201
	1.71427	12.2177	5.82584	3.49326		21.5643	19.5775	4.80607	15.1879		1.28362	2.21905	9.53251	26.2603		3.0786	5.64449	3.92579	2.18169		2.27632	7.96885	7.1749	3.83415
	9.22133	2.81278	23.0363	0.522047		0	3.1293	7.29605	6.09208		3.40788	12.8555	30.8574	4.41065		3.20766	1.17696	6.65531	5.3289		8.3863	1.1603	7.80856	12.0923
	27.0537	0.868388	0	1.98431		0	10.3004	1.2446	12.8667		21.5791	13.0217	33.0146	16.0306		1.86374	1.83225	12.7847	6.80546		2.23489	21.8927	6.58353	20.8436
	4.45513	17.8763	9.62822	1.07716		3.22171	0	1.31128	9.20322		1.86597	8.06486	11.5863	37.1489		5.74754	1.54178	4.48849	6.60637		14.4981	1.66289	4.45363	39.4645
	1.6031	5.62405	2.58516	0.982734		1.97296	0	0.961664	0.693443		10.8354	5.84931	1.8607	17.6581		7.51025	2.4105	3.06847	0.872021		6.57675	2.22417	11.7021	38.9359
	4.34952	16.2288	6.86781	1.89769		2.03388	0	4.42229	0.72731		7.30626	5.65021	38.9972	17.9744		2.65842	13.6914	5.92095	4.57111		1.63826	0.261325	1.08607	26.2603
	1.65612	3.30651	2.25647	15.3698		2.31874	14.4602	14.3131	3.35294		12.2978	1.41018	20.0705	0.660326		1.07373	1.01062	5.61182	3.81669		8.51564	4.61474	6.76086	4.41065
	0.712694	2.11404	2.11922	4.64433		9.23344	18.0923	0.664303	4.69993		14.213	0.9588	3.28227	40.1404		1.31675	3.14982	5.17255	9.14033		1.37326	6.01259	6.31005	16.0306
	4.32941	1.0286	9.5738	4.05623		2.21344	11.2281	0	13.6021		4.52547	20.3307	2.08601	20.2013		4.99442	2.56806	1.5419	6.37768		0.513059	4.23368	6.23125	37.1489
	0.88883	3.55468	0.832174	7.84643		2.01721	0	9.32087	0.627414		8.76828	15.7344	9.74246	6.08891		13.0029	0.979262	0.478865	8.29716		9.47035	12.6856	6.07002	17.6581
	7.08962	0.493655	0.56139	3.77437		8.03396	3.63904	3.45207	12.1124		1.93404	4.16481	22.4055	3.09589		0.548982	1.16422	8.84862	13.5942		12.7291	10.9843	11.6171	17.9744
	1.14692	2.78521	2.01505	2.77214		0	1.27407	1.54899	8.24748		9.23888	6.74067	31.5297	11.6998		4.03867	2.9695	2.11702	4.00992		14.5679	2.49942	25.7905	0.660326
	10.3081	13.6889	11.3159	2.98255		7.11858	1.86327	5.01906	1.38384		12.747	24.2993	7.85061	20.1468		7.07836	2.68653	4.46115	2.31529		2.07899	6.17685	8.89153	40.1404
	6.18291	4.15061	4.9964	2.28401		0	1.99366	10.0563	1.07142		14.9542	1.54276	12.1803	13.3412		6.81518	2.99301	6.52204	4.8538		2.14672	0	26.9764	20.2013
	2.00775	1.27632	1.57705	0.507698		3.83811	7.79032	1.99453	9.16948		1.74457	25.3951	15.0191	87.1692		6.19903	5.16967	2.54105	0.598163		4.1972	1.51629	15.1075	6.08891
	8.65199	3.1202	1.64815	55.6622		14.6968	36.7612	44.6831	3.07792		2.08174	7.38878	22.3849	39.9853		3.02364	4.63907	14.9069	34.7861		0.819479	23.4356	14.6244	3.09589
	15.1343	2.41467	7.24093	1.84865		3.75347	10.5176	25.0901	27.4518		2.72485	4.66381	6.78437	28.498		5.27293	1.24006	2.91589	5.20135		1.4343	1.97145	1.32403	11.6998
	5.70411	1.21198	15.9108	13.7221		0.871087	0.738087	53.6477	4.01569		6.70573	3.01586	15.5442	36.8684		9.76945	8.447	8.35254	2.36822		2.5533	5.78756	4.38977	20.1468
	31.2709	6.22844	5.60658	2.05995		1.30348	7.26761	2.13612	23.4113		6.09201	2.01192	16.0775	15.8834		6.48422	2.90551	19.7298	5.23392		2.53312	10.5979	21.2146	13.3412
	5.93511	1.69444	6.18164	1.57544		0.639665	0	4.10838	9.6196		7.12139	6.55233	6.76803	17.921		4.40009	1.71009	5.7283	12.0481		5.23844	1.99482	5.7908	87.1692
	31.6782	1.76913	7.53479	2.73625		50.3472	7.4363	3.22506	1.25646		14.9375	22.1456	42.6008	20.2875		2.8865	2.68631	12.6037	8.2957		3.46462	11.1333	2.06657	39.9853
	2.25384	2.80156	2.2257	3.06454		4.77309	1.74845	3.7254	0.854116		6.17086	12.3797	11.4619	24.0925		8.64657	2.91397	3.62468	2.92025		2.98813	6.27791	3.93917	28.498
	0.344113	1.59889	3.30175	2.28369		1.71421	8.80981	14.6075	1.29727		6.67622	15.6722	8.53042	29.0055		9.03555	3.27152	7.06572	4.32252		5.61604	38.604	8.53114	36.8684
	0.443785	5.03491	9.79942	4.16173		11.5932	18.6004	9.78848	38.8274		3.63544	4.4546	14.7396	48.8201		1.54756	6.35132	0.570857	11.5822		2.40372	13.6524	2.03276	15.8834
	3.42622	1.52248	8.07446	0.906229		23.0304	2.07998	14.2589	21.9863		10.1084	8.97872	12.857	33.7423		5.5267	9.54508	2.82557	12.1878		1.50478	5.30281	6.91294	17.921
	6.19129	0.654185	1.86591	5.23693		5.98989	4.37573	4.99906	15.7579		2.64932	4.35072	14.9383	20.7939		3.01492	7.35622	1.93687	4.84275		2.23176	3.29058	5.93606	20.2875
	1.00567	2.5877	0.875276	14.9676		0	3.00888	10.2126	14.8677		5.26123	2.18321	9.12266	18.3629		4.59492	3.35714	2.54198	11.5821		4.9312	0	1.63234	24.0925
	2.33304	2.19289	7.13531	3.99152		15.6054	0	18.7701	14.8658		0.552928	9.82056	1.23605	55.6057		4.9298	3.19173	7.89471	3.11572		0.622774	0.857494	32.2787	29.0055
	2.27405	3.49275	0.423374	19.1723		0	0	20.3628	17.5218		2.01724	2.28212	2.9765	14.1979		15.97	2.58238	3.43221	0.962495		0.442813	2.24097	9.13064	48.8201
	8.74	4.94839	1.07157	3.74381		5.44449	0	36.9313	7.73392		0.907563	5.56123	1.75209	6.62613		6.14452	0.849341	5.44883	4.35058		2.32828	2.56474	18.7737	33.7423
	14.7478	0	11.2973	5.21256		1.84611	1.3574	7.86888	34.3517		2.98825	9.89525	2.97348	0		1.65453	5.33752	5.58863	0.936719		1.18667	0.936688	9.09306	20.7939
	3.72749	8.44418	1.56076	3.85582		9.96791	0	1.32057	61.4531		0	1.34203	1.26537	17.3808		4.36711	1.53499	2.59714	5.92766		16.3438	23.4997	39.5575	18.3629
	36.6259	2.16593	12.6056	1.42527							4.21213	4.45591	7.19352	3.85333		14.0414	11.4018	4.96111	9.05438		2.66505	6.87279	10.83	55.6057
	2.69297	1.53808	5.29976	2.57795							0.690895	0.455077	2.3663	10.5427		0.449521	2.6216	4.01305	3.96301		2.3684	0.744402	32.4567	14.1979
	10.4697	4.4176	0.736445	3.37421							15.8433	3.88907	3.46471	1.03037		6.04543	0.905963	9.07015	6.31842		1.6906	5.56661	4.98817	82.0112
	4.3549	2.57356	1.75479	2.86001							1.0295	8.82462	1.04916	11.3586		3.36965	2.2489	12.7919	1.42774		6.27535	2.22326	112.427	2.60471
	3.824	0.89903	1.4889	2.4736							3.40494	0.884698	0	3.40573		11.086	4.88054	1.84479	0		0	3.78821	0.731001	2.40538
	20.1287	6.04309	6.25239	3.34888							8.53291	5.2093	0.560849	7.82458		14.1114	1.78394	3.01323	7.99572		21.3353	2.5335	3.4486	3.30943
	6.21195	3.46772	6.84427	6.38701							1.68683	1.94331	1.57975	4.76069		1.44578	0.899488	7.69571	12.1299		26.1354	1.54567	1.87492	4.928
	10.4216	3.96802	8.96405	7.8865							17.8747	10.6948	4.65861	16.6593		8.21443	2.76813	2.10582	5.11918		2.87814	0.717887	5.16349	1.74384
	3.85459	32.0561	0.746531	6.29461							1.53202	1.30208	10.251	7.76849		3.17048	2.68345	7.28556	4.7928		0.679197	2.29627	0.771842	10.9122
	3.78067	6.41132	2.05892	0							0	2.74706	6.63434	16.4517		0.427952	4.10723	4.26225	5.35632		3.89706	1.06623	0.680558	7.5981
	5.35685	16.6761	1.20061	7.68152							7.48789	0.952745	1.51773	1.04794		3.68496	9.07073	1.77645	10.2846		0	4.22444	1.14712	10.2779
	9.96462	21.3467	8.61313	2.90191							1.32588	1.67476	1.07225	8.82136		2.95682	2.68841	2.11709	1.35723		0.808089	7.02495	3.82592	18.3697
	4.89575	25.3074	51.1626	3.96089							0	1.12596	2.26766	0		8.33474	2.23189	3.87618	1.68246		0	1.88582	4.92401	2.56007
	10.9708	4.36637	11.5341	3.84153							11.7398	0	0.974515	0.483863		1.50309	5.62861	7.61438	6.76972		14.5111	0.499677	7.09907	2.69993
	3.35188	8.20329	0	1.47423							4.95175	5.37464	1.65663	6.55463		3.19627	5.75094	9.4354	8.31766		22.1465	3.1437	1.65176	7.06699
	2.9227	2.07801	0	1.76277							7.59957	2.43331	7.16222	7.7601		4.0567	7.53817	2.69199	11.268		0	1.18055	1.90522	2.36996
	0.791793	2.42691	0.681521	3.35236							11.4522	9.07491	5.82297	0		3.09539	5.32329	3.30484	3.26001		13.6137	1.93374	1.83901	4.49407
	6.12925	6.09666	5.11801	3.63179							0	1.11888	51.2059	13.2908		3.48426	5.69824	0.478968	2.74045		2.64768	1.29394	3.22505	0.595026
	4.55673	4.75441	6.66263	3.87122							0.865156	7.25915	1.94751	13.3002		4.18818	1.89868	1.50006	2.3066		1.98832	5.03286	1.37379	6.76511
	8.83342	5.31191	4.90153	11.5828							0.831972	1.79991	4.46825	5.26016		1.99367	8.94529	2.71147	6.1115		1.20062	2.43481	1.95921	0
	0	2.4146	0.745639	1.26555							4.08697	15.8938	3.38243	1.82917		1.49741	5.38628	6.56073	2.84465		12.5603	5.87144	9.10245	5.62926
	2.97694	7.66467	3.29069	6.3975							10.397	3.27245	6.19173	2.28697		4.86444	2.84049	8.7285	6.57648		11.0298	1.6725	1.1744	54.9429
	0	0	8.57543	0.869384							2.55654	0.683199	5.77675	7.06032		3.44514	1.42707	0.354205	3.48692		5.12923	1.24552	1.88791	1.99005
	5.88989	13.6845	3.03392	2.30654							4.44313	2.9552	9.59248	55.7306		1.547	17.6833	0.861298	2.38239		0.864704	21.3335	7.61473	0
	1.47864	4.59889	4.23997	41.4589							0.248016	0	10.7292	0.661581		1.61746	1.39973	4.77588	5.57488		1.38421	3.08733	2.96244	18.3298
	0.629592	3.27672	2.97463	3.49519							2.14343	0.786716	4.02177	0		3.50217	1.80562	1.05263	0.595987		8.71003	2.59455	3.43576	33.3096
	23.8273	5.7305	1.94254	3.83225							3.09177	5.32758	0	2.69819		3.16962	2.55472	2.73423	1.37256		2.39326	3.23187	0.510337	1.13068
	21.7581	2.41932	3.95029	4.32654							6.74889	2.65879	6.15373	2.65036		0.773228	1.15559	0.352521	1.87029		2.68049	6.22634	15.593	2.68685
	0.36262	2.83549	6.37684	16.3186							1.91681	9.79786	5.08975	17.2277		2.03005	17.057	0	2.01674		7.87213	0.412812	0	2.95296
	6.94272	10.3564	2.81825	0							25.5086	14.1928	2.92947	17.1717		1.75528	8.17937	9.30446	13.9256		3.07291	0.450908	46.3388	4.21103
	1.95138	0.597771	2.77501	3.98563							29.003	3.55114	5.07362	21.4895		6.8495	14.8535	3.05181	1.29478		5.83898	5.84468	0.704757	4.75852
	4.56005	7.04384	0.805443	1.10374							3.42558	10.2097	0.813719	1.64239		0	1.15121	3.55371	0		15.0066	16.7078	13.9498	0.553816
	4.97874	4.90743	6.32479	14.859							3.14483	16.5963	0.655341	11.8687		3.44027	0.692351	2.40989	5.80907		3.45484	52.4401	2.68332	2.79206
	0	2.29873	2.96468	7.23995							0.823586	5.99705	7.54919	20.4255		0.433881	0	9.71745	3.54024		0.702435	31.4858	0	0.928732
	3.59559	4.61344	0	9.8841							1.12229	16.536	13.1095	14.0369		4.048	0.441267	4.01469	0		5.34887	20.8221	0.664996	1.34829
	3.03247	1.88466	5.75928	1.3136							13.5604	26.6205	30.0508	2.50203		1.09397	8.24984	34.3702	9.38998		0	36.921	3.5239	4.65524
	1.27971	0	3.05326	1.90516							1.86973	1.69471	7.23197	2.72086		2.694	9.00126	23.1755	0.745039		0.704882	49.6412	45.2398	0.713869
	1.11758	3.47307	9.30681	2.29611							0	27.3637	5.13028	0.32448		5.97538	2.27577	0.370687	4.35405		11.4433	15.221	93.9208	93.2536
	5.62957	5.62645	3.49855	1.26718							0.936804	2.97775	6.97104	4.66098		5.49298	11.4459	29.206	2.88676		15.6872	8.77103	77.8302	45.7301
	10.876	0	4.14328	28.8245							1.50565	2.4554	6.07174	12.4661		3.03844	18.8012	2.73877	6.0435		9.59949	1.00437	42.5036	22.7755
	4.28896	1.22521	3.45148	0.742375							3.21074	2.98573	0.91353	1.19255		0	8.49519	7.86691	78.0303		64.8998	20.9318	96.9778	0.499173
	15.8764	6.92387	1.90856	2.74911							2.70068	0.763498	0.622819	2.66286		2.43266	8.32475	17.7406	76.9827		3.16653	24.6422	68.1199	0.403334
	2.86452	4.4918	28.9721	5.70465							10.6967	4.58007	15.0616	10.1285		4.56817	1.91782	1.85831	1.99841		4.46576	7.43207	77.4178	4.1006
	2.18403	5.37197		7.73092							9.91896	6.06563	8.994	5.90151		3.88225	2.88732	14.6606	2.1384		17.2917	2.7424	30.4667	115.794
	2.4096	9.18935	10.3017	8.43764							0.665469	9.25292	3.31989	43.4089		9.94313	4.26089	3.72808	0.222225		2.51279	4.21578	22.4135	59.768
	1.77296	17.1904	0.6943	1.08472							6.20631	3.29939	14.6332	0.875141		0.578726	18.6742	15.5519	0		4.02818	16.0582	22.2595	43.8934
	15.4803	27.2575	6.11698	5.73555							2.90881	2.88089	9.967	5.89462		1.64535	2.97958	0.589467	48.259		6.60824	5.37216	44.4006	25.9367
	8.89197	2.93392	3.34666	3.33451							3.59741	5.31804	8.96345	9.10685		3.56185	2.27072	0.680262	21.8195		13.278	3.99929	22.7762	38.1493
	3.69646	7.48536	2.9445	7.67379							3.72363	4.04856	24.5516	5.75191		3.97843	5.24882	0.845545	0		16.6361	0.525942	48.8327	42.9126
	8.51024	3.41243	8.2778	19.1522							3.88453	13.0489	33.0679	0.475061		6.24741	15.9598	1.54103	43.9312		16.0964	6.36036	49.7558	35.3359
	8.87725	0	1.01748	4.99994							0.598674	1.37696	18.3142	30.9038		1.62741	3.84925	1.29011	0.486992		8.83691	29.8342	80.1176	13.4728
	8.66631	0.725094	3.9563	0							4.64701	5.53257	30.0844	10.932		2.1433	21.4141	32.5714	4.11325		1.04427	35.8899	47.8743	42.331
	1.85125	2.78523	0	4.70241							13.4253	7.47194	8.46586	5.21575		0.268079	25.0714	3.24196	1.55551
	0.388901	4.35989	4.34548	1.1606							1.88247	0.677813	5.17121	3.37193		3.50054	24.9945	2.49985	5.28425
	2.35025	2.07907	6.24682	6.30643							1.68215	2.26317	0.780329	7.99528		2.95855	5.08604	39.5025	1.43192
	5.46024	2.02503	5.72891	2.45016							12.0762	3.70195	0.440014	1.61375		19.0665	12.8087	36.2123	0.45058
	7.87248	37.0842	5.16757	5.96086							0.489284	0.467555	0.749014	0.534924		2.34169	3.04802	4.30029	2.85922
	2.84508	9.11704	1.71733	5.84642							11.5518	1.76547	3.82271	0.79457		0.498075	7.80878	44.2588	4.20604
	1.08527	0.649555	3.08616	3.82203							1.45776	4.94839	4.99328	1.8322		3.58268	4.81795	29.2281	0
	0	3.13747	27.7077	6.17836							3.1458	0.510366	0	4.64628		2.6909	30.0424	24.3337	3.53737
	9.53466	0	23.5796	5.99743							5.67612	1.3774	9.68866	1.37364		18.8587	19.3795	26.1311	21.5397
	4.90648	6.28533	22.191	26.9358							11.7696	5.53937	2.52131	2.12547		0.274772	23.2824	1.18688	4.53157
	11.2324	9.93217	3.02842	0							0.240509	15.3829	8.50492	2.29931		4.34373	44.3068	1.42234	46.7363
	2.5801	0	0	0.959202							1.59659	4.64808	15.3273	25.8255		2.73448	15.9159	2.91641	36.1612
	62.4894	4.08005	0.929856	1.43075							1.6477	8.94479	4.05633	0		2.12847	0	1.04633	30.5182
	6.41235	10.0684	1.14549	4.62179							0.91494	0.556645	8.16476	30.8808		74.1278	5.41028	5.86674	33.2785
	1.30689	0.666173	4.49958	3.84203							0.537785	6.43533	2.098	12.1669		7.29308	0.618981	2.55825	42.3208
	5.21269	0	3.77043	3.94355							3.06228	14.5044	2.29552	12.0204		5.00764	3.54243	1.56643	33.2068
	9.3043	0.61535	7.58548	1.88183							5.25766	0.661534	7.97683	2.60508		19.3036	0.443924	1.50015	34.1014
	2.71561	3.72554	7.21016	5.05835							0.604718	1.10947	7.57971	4.53256		1.11878	0.577193	5.31882	7.7257
	5.50215	5.25284	2.50432	3.22295							4.66897	6.50137	1.8208	47.5126		1.31227	2.58033	14.515	65.465
	1.07714	3.02642	6.27939	3.27885												0.754019	2.29064	2.94869	8.39494
	4.1237	10.4216	0	0.943041												5.34338	1.50805	1.87797	59.5859
	1.88467	7.47593	30.1027	0												2.90111	53.8473	1.31471	21.9634
	4.0183	2.29966	3.77368	1.45482												9.15246	29.7714	0.486262	85.2203
	6.27643	5.62501	34.8347	6.3273
	12.5955	10.081	17.5667	1.94988
	3.43732	0.527997	3.40684	12.2197
	19.0815	1.77725	0	38.6003
	0	13.5518	5.979	12.116
	4.32647	0	7.37943	8.80354
	3.85647	3.15405	2.94113	7.35998
	8.03396	1.38689	21.9218	13.8604
	3.42611	5.15752	10.1452	11.9769
	2.287	9.22242	5.8474	25.6552
	2.40421	3.46893	4.23753	16.4941
	0	7.18163	0.543536	8.34833
	0.414185	3.32051	3.52519	13.158
	1.25994	10.9703	7.03095	0.634121
	6.62827	9.23788	5.16582	9.30313
	11.8865	6.62915	3.99204	6.27099
	6.29908	14.1856	4.25434	19.7008
	9.09633	4.02024	6.79642	15.6184

## Sheet: Figure 6J-Summary MG Changes
AAV:	CaMKIIa-Gi DREADD				No DREADD Control		CaMKIIa-Gq DREADD
Drug/Dose:	CNO, 5.0 mg/kg	CNO, 1.25 mg/kg	Saline		CNO, 5.0 mg/kg		Saline	CNO, 2.5 mg/kg	CNO, 5.0 mg/kg
Mouse 1	285	160	112		107		93	139.29	211.72
Mouse 2	205	147	90		96		102.52	134.88	254.3
Mouse 3	209	185	97.25		91		111.62	229.25	217.36

## Sheet: Figure 6K-Gi Motility and Calci
	Stable	Ext./Outgr.	Retraction
	41.3611	11.9832	47.9548
	15.3331	12.7763	0
	20.4189	39.6969	50.7151
	2.55031	92.8855	18.6557
	14.2647	1.79814	22.0408
	51.3834	52.2405	8.89113
	4.35786	10.9815	16.2842
	7.61037	4.96004	54.8867
	89.6063	40.502	38.5519
	32.7148	53.1333	11.9711
	2.96822	9.53356	5.14741
	34.8948	8.63899	20.5411
	2.99248	16.6007	14.2439
	19.8098	18.762	21.0053
	68.264	24.5183	0
	39.1953	36.9836	11.1602
	14.6771	34.2235	22.941
	7.90365	26.2679	0
	26.8604	3.81538	1.10018
	35.2084	58.8734	0.466124
	0	65.2505	25.3703
	16.956	195.818	5.85841
	5.79194	105.637	6.41702
	44.6073	55.4895	0.764832
	3.1173	36.1651	9.79822
	3.25925	2.57883	13.3915
	26.0733	5.3074	5.57007
	7.28052	24.3688	2.23525
	12.9145	12.5911	2.04647
	6.14541	17.0403	4.31658
	2.07826	6.55256	15.9068
	3.27935	41.5122	7.27442
	6.01919	27.5031	8.72633
	6.34756	14.9598	7.49457
	3.4688	18.5454	1.67704
	2.35538	4.90607	5.72396
	3.50695	10.9059	2.79953
	2.22043	18.2808	11.2256
	4.16883	17.4598	7.50899
	3.38005	4.38887	1.38915
	14.5922	8.8973	5.56954
	4.28554	19.0944	9.58466
	4.6672	3.48487	13.4404
	5.0467	2.24072	3.62094
	1.51406	36.776	7.60274
	6.23643	2.67785	9.39364
	21.1405	42.5876	5.3943
	54.0411	17.5463	7.49281
	3.44508	9.28108	6.42083
	11.7022	26.1256	2.38821
	14.402	2.96306	7.9755
	14.7795	9.22971	10.3371
	5.42229	53.987	2.66697
	5.26503	11.9948	11.7292
	5.80243	26.0638	10.6827
	2.83886	2.67126	2.36378
	0	3.82383	8.471
	0.674648	1.79737	5.92222
	1.79235	2.44973	2.52672
	5.32966	9.69698	4.53433
	5.77519	6.21731	6.22492
	3.11509	3.99992	7.5038
	0.936292	0	4.63192
	3.0727	7.4187
	35.6103	2.96211
	4.63461	114.222
	3.30814	70.4166
	13.2614	48.9669
	0.685419	74.6156
	3.3187	38.2799
	3.58191
	3.63236
	22.026
	3.30784
	8.96872
	5.31858
	4.84573
	2.7021
	3.44062
	3.67675
	3.42798
	2.50898

## Sheet: Figure 6L-Gq Motility and Calci
	Stable	Ext./Outgr.	Retraction
	8.96564	29.5493	2.02338
	22.7237	25.0671	16.6285
	8.12164	35.4396	11.7047
	9.14707	63.8558	11.4406
	8.5798	7.58184	12.2637
	17.6041	31.709	6.50926
	3.56385	21.4883	1.27149
	2.66178	28.2569	3.6562
	0.496411	44.0953	6.1695
	29.3812	71.8294	22.6136
	4.54893	6.86986	4.82506
	18.8454	2.31373	5.48561
	13.9095	10.6057	1.49399
	0.539504	3.1229	3.99203
	13.8575	3.16951	11.7211
	2.08851	10.8376	9.25331
	6.70102	6.44899	19.6876
	3.06471	4.61588	11.3531
	7.88371	8.11105	3.43474
	5.09556	17.8594	6.77699
	29.0517	7.16404	8.79137
	2.20375	0.576131	12.0432
	31.4273	4.12015	14.184
	6.8876	3.17589	34.9222
	5.02904	8.67727	25.912
	3.57205	7.06658	22.1824
	6.41571	51.8106	7.79836
	41.7278	13.4321	4.96551
	13.7778	12.0647	2.48238
	21.9233	3.06511	1.70427
	1.26078	12.3359	8.89998
	1.0599	2.84153	0.621862
	3.17246	14.0473	4.98695
	6.0763	27.7626	4.75345
	29.8333	18.6695	2.45554
	7.61632	24.8163	8.89628
	21.218	8.72556	3.33781
	5.09019	13.5567	7.07846
	5.25264	23.846	2.29506
	0.440745	29.799	0.670685
	4.73516	30.7078	0
	5.08071	15.5643	1.20022
	0	8.02621	2.7248
	6.27592	7.66809	4.10855
	22.6796	10.4586	6.40288
	13.8473	15.641	3.63364
	2.96819	24.6512	5.76277
	0.8249	5.48367	3.09193
	1.17039	43.9124	6.89994
	0.943978	17.3316
	0.293538	7.19788
	3.15823	22.8952
	0	9.56458
	1.71069	14.3476
	2.49044	5.46065
	2.83179	25.834
	0	11.5282
	2.02425	8.61744
	17.5901	6.40078
	2.47203	5.06052
	19.9608	10.4786
	0.330364	6.24761
	1.30418	9.61383
	0	10.5657
	0.737787	11.631
	0.627375	10.1381
	0.817097	12.9285
	0.686218	49.2264
	1.72318	13.0222
	0.420056	9.44615
	0	15.2719
	65.9316	9.96026
	1.45124	5.01338
		6.85683
		24.8797
		4.08229
		27.9549
		13.1063
		10.8031
		4.20893
		10.9419
